# Supplementary material for: Regioselective vicinal functionalization of unactivated alkenes with sulfonium iodate(i) reagents under metal-free conditions
Source: Royal Society of Chemistry journal article supplement (doi:10.1039/c6ob01179a), 2016-01-01

## **Supporting Information**

### **Regioselective vicinal functionalization of unactivated alkenes with sulfonium iodate(I) reagents under metal-free condition**

Dodla Sivanageswara Rao,<sup>a</sup> Thurpu Raghavender Reddy,<sup>a</sup> Kalvacherla

Babachary<sup>a</sup> and Sudhir Kashyap<sup>\*a,b</sup>

*<sup>a</sup>Department of Chemistry, Malaviya National Institute of Technology (MNIT),*

*Jaipur-302 017, INDIA.*

*<sup>b</sup>INSPIRE Faculty, Department of Science and Technology (DST) and Assistant*

*Professor, Academy of Scientific and Innovative Research (AcSIR), INDIA.*

*\* Corresponding author. Tel.: +91-9549657150;*

*Email: [skashyap.chy@mnit.ac.in](mailto:skashyap.chy@mnit.ac.in), [skr.kashyap@gmail.com](mailto:skr.kashyap@gmail.com)*

## **Content**

NMR Spectral Charts

S2-S75

<sup>1</sup>H NMR Spectrum of compound **2a** in CDCl<sub>3</sub>

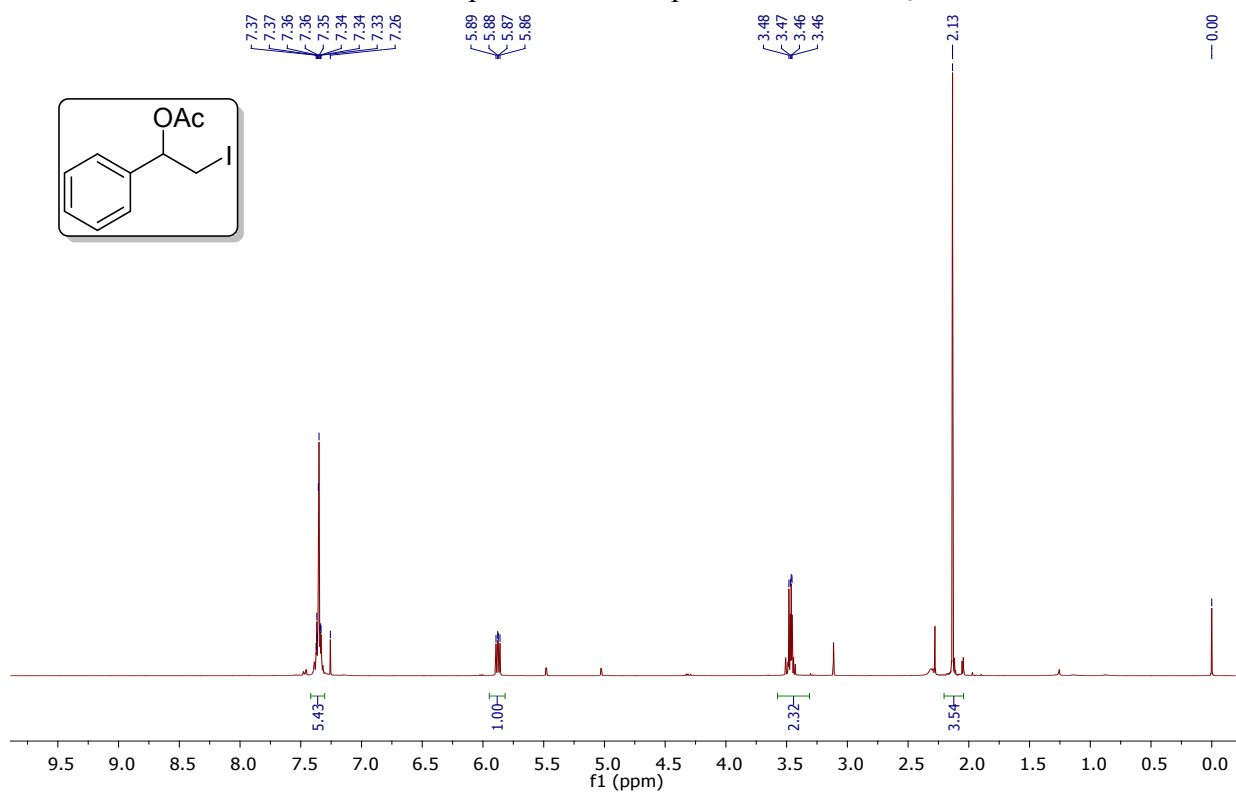

<sup>13</sup>C NMR Spectrum of compound **2a** in CDCl<sub>3</sub>

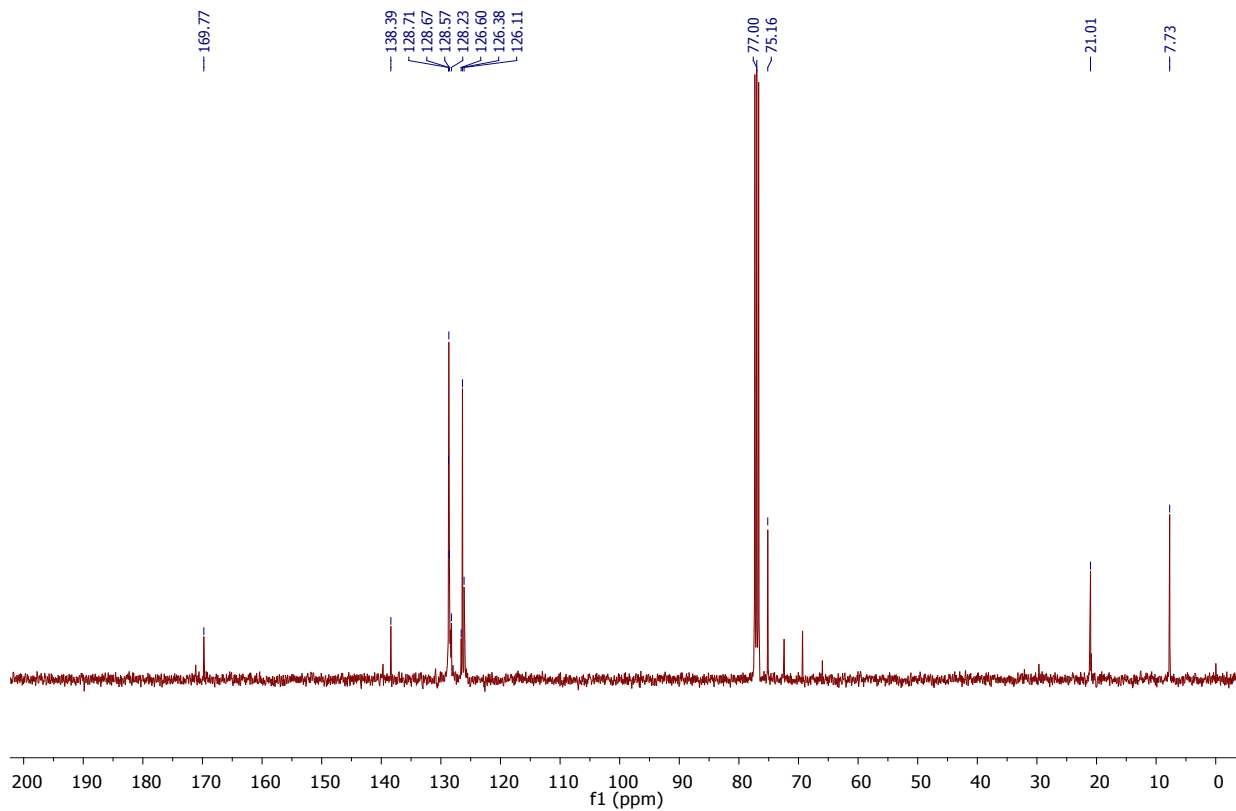

<sup>1</sup>H NMR Spectrum of compound **2b** in CDCl<sub>3</sub>

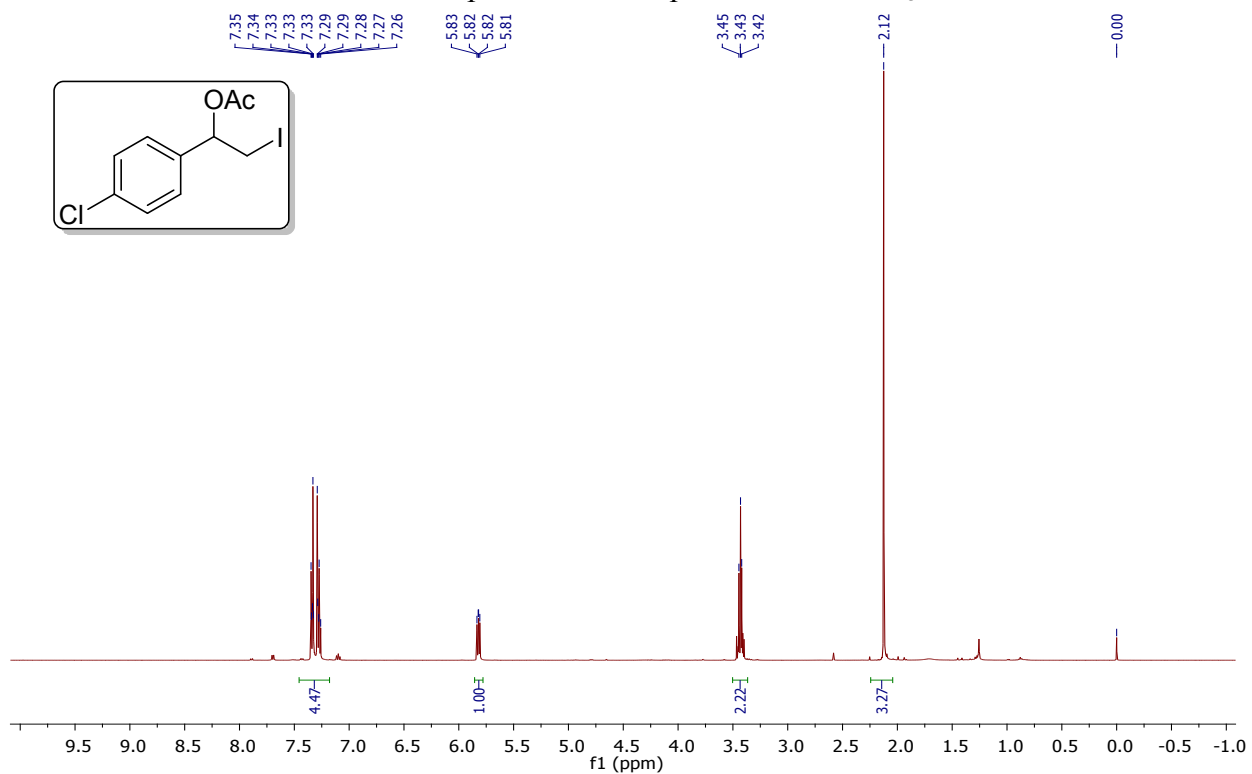

<sup>13</sup>C NMR Spectrum of compound **2b** in CDCl<sub>3</sub>

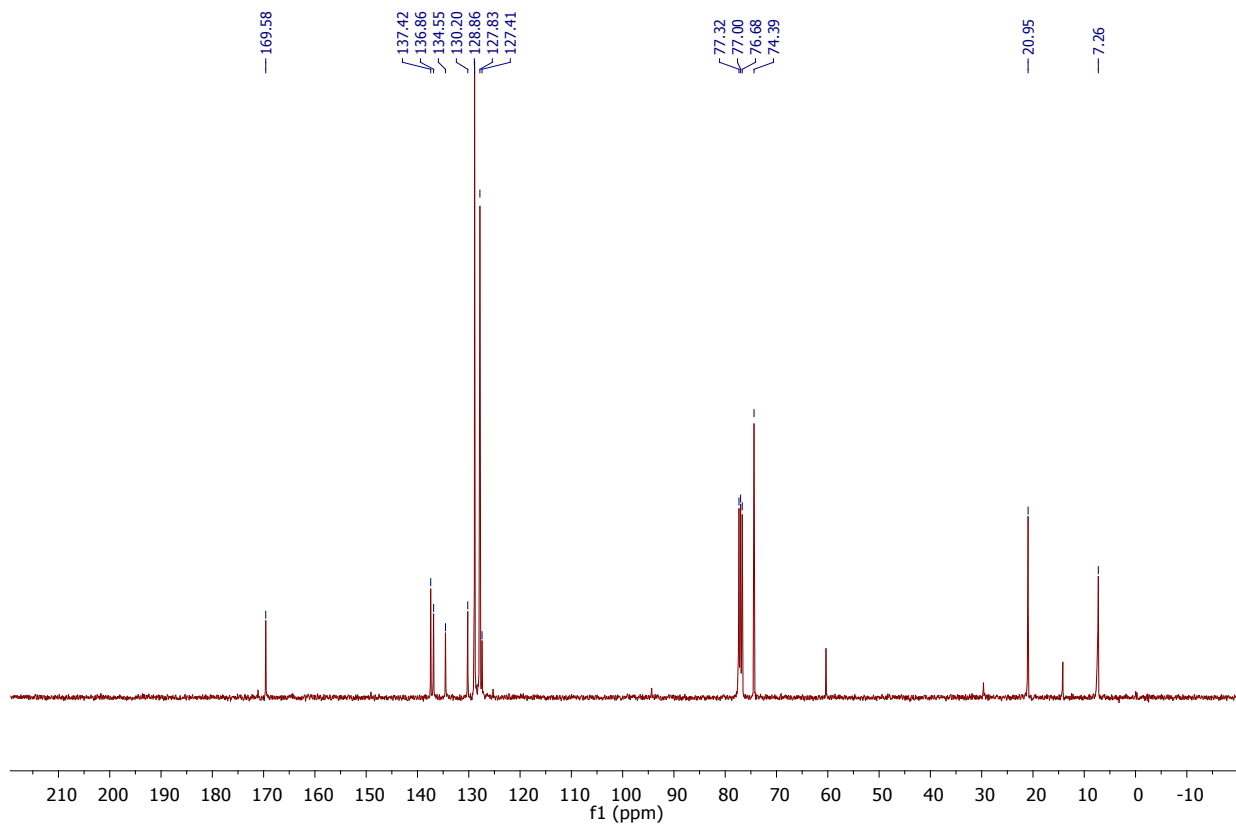

<sup>1</sup>H NMR Spectrum of compound **2c** in CDCl<sub>3</sub>

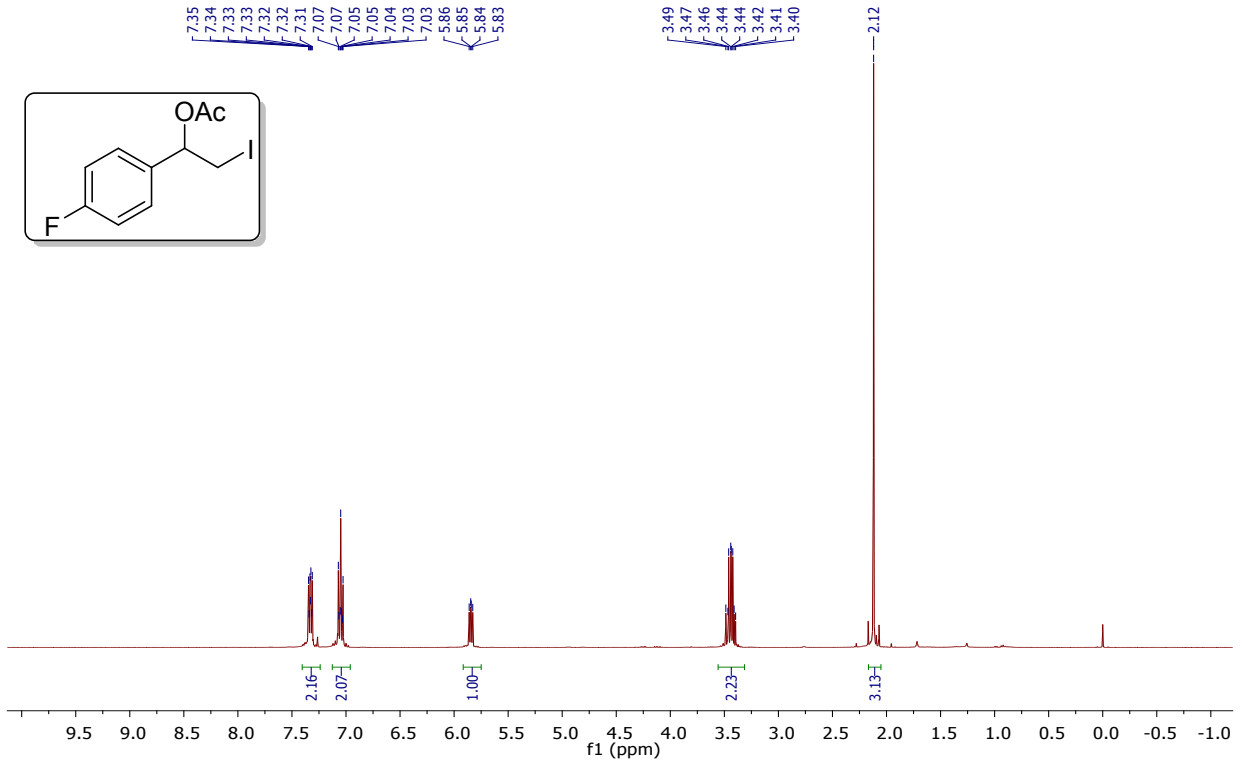

<sup>13</sup>C NMR Spectrum of compound **2c** in CDCl<sub>3</sub>

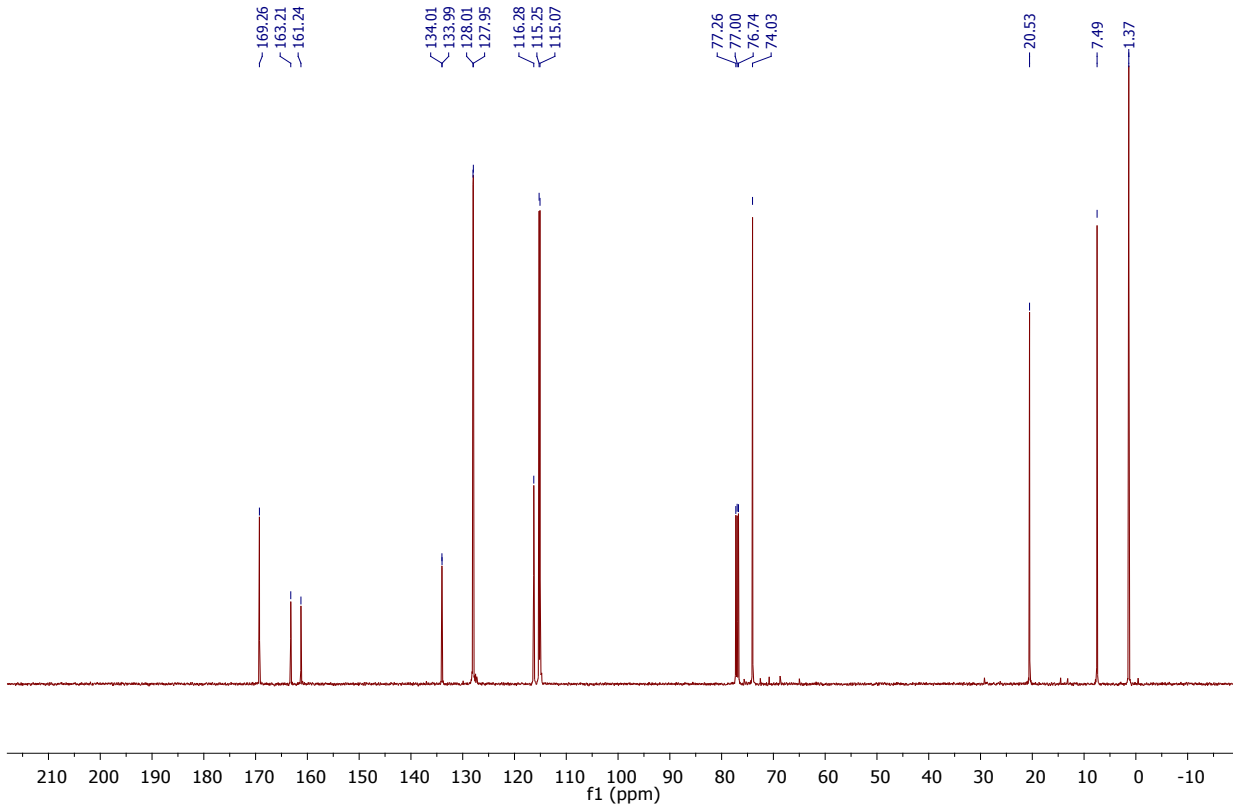

<sup>1</sup>H NMR Spectrum of compound **2d** in CDCl<sub>3</sub>

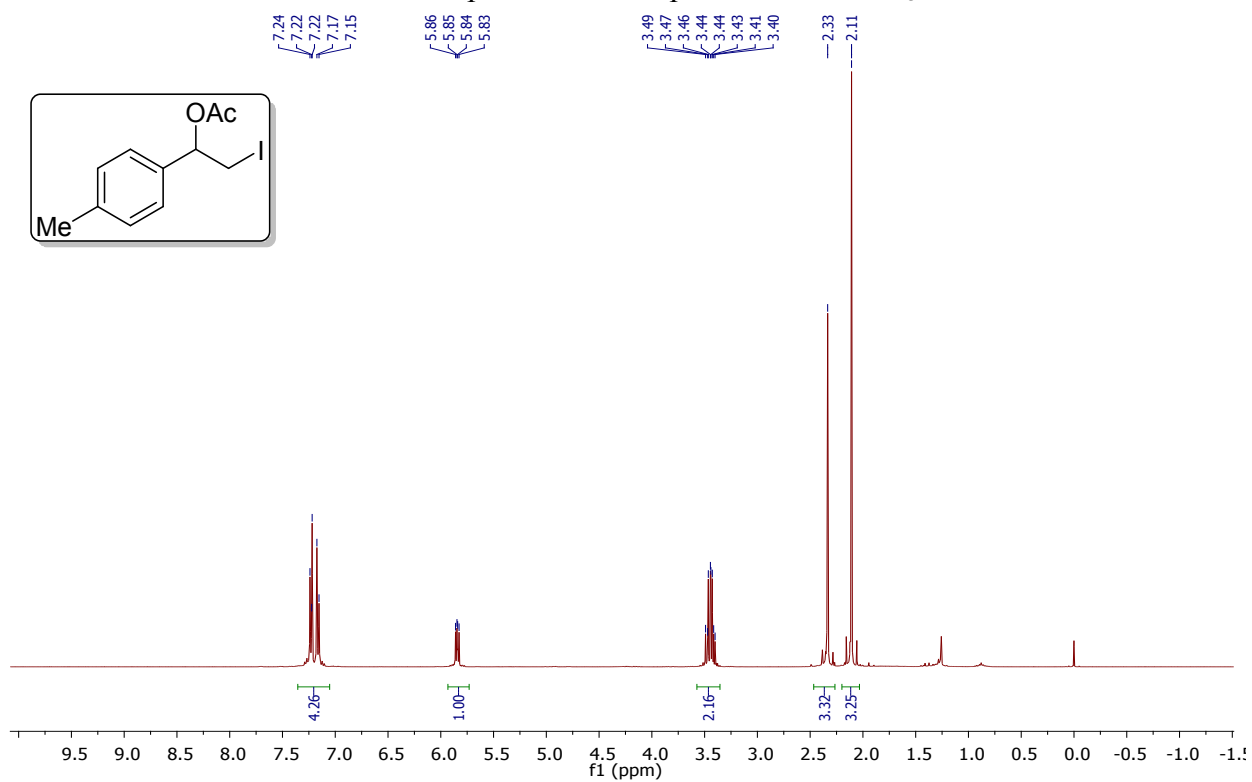

<sup>13</sup>C NMR Spectrum of compound **2d** in CDCl<sub>3</sub>

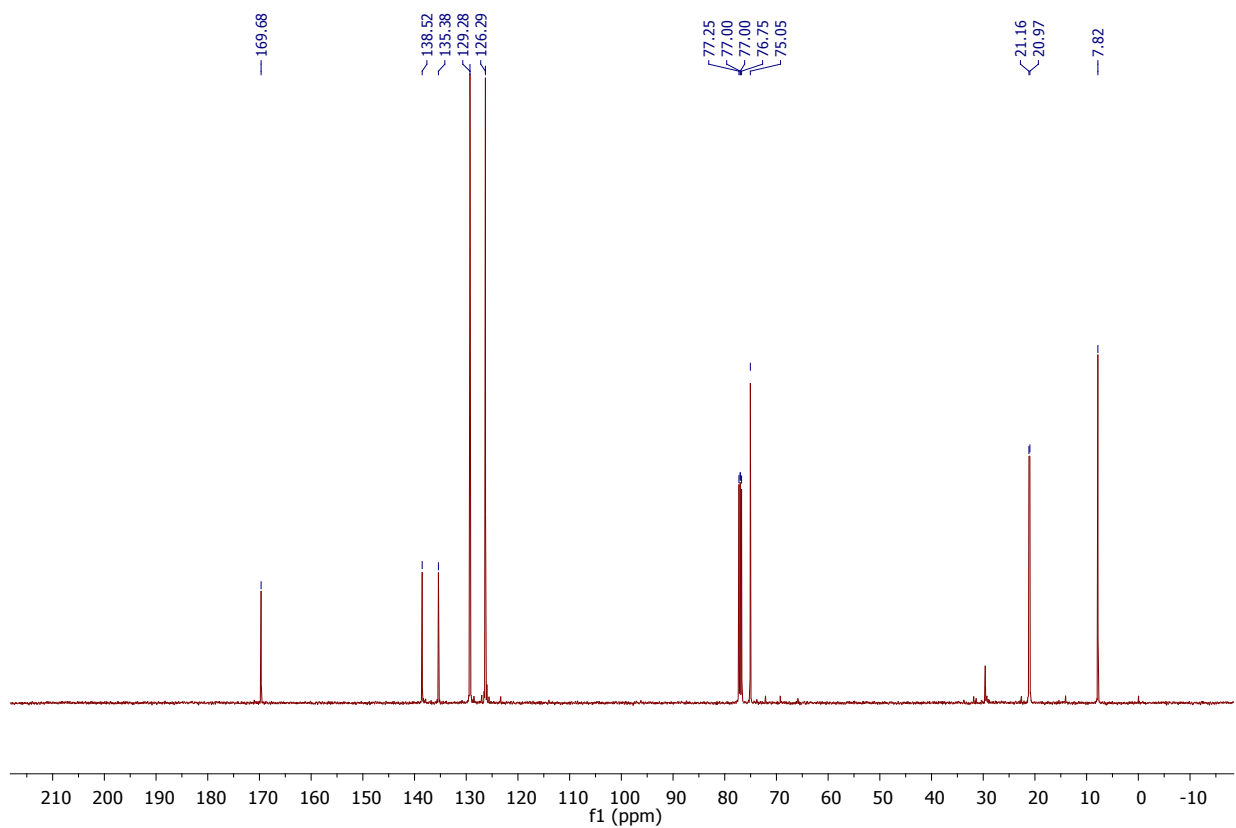

<sup>1</sup>H NMR Spectrum of compound **2e** in CDCl<sub>3</sub>

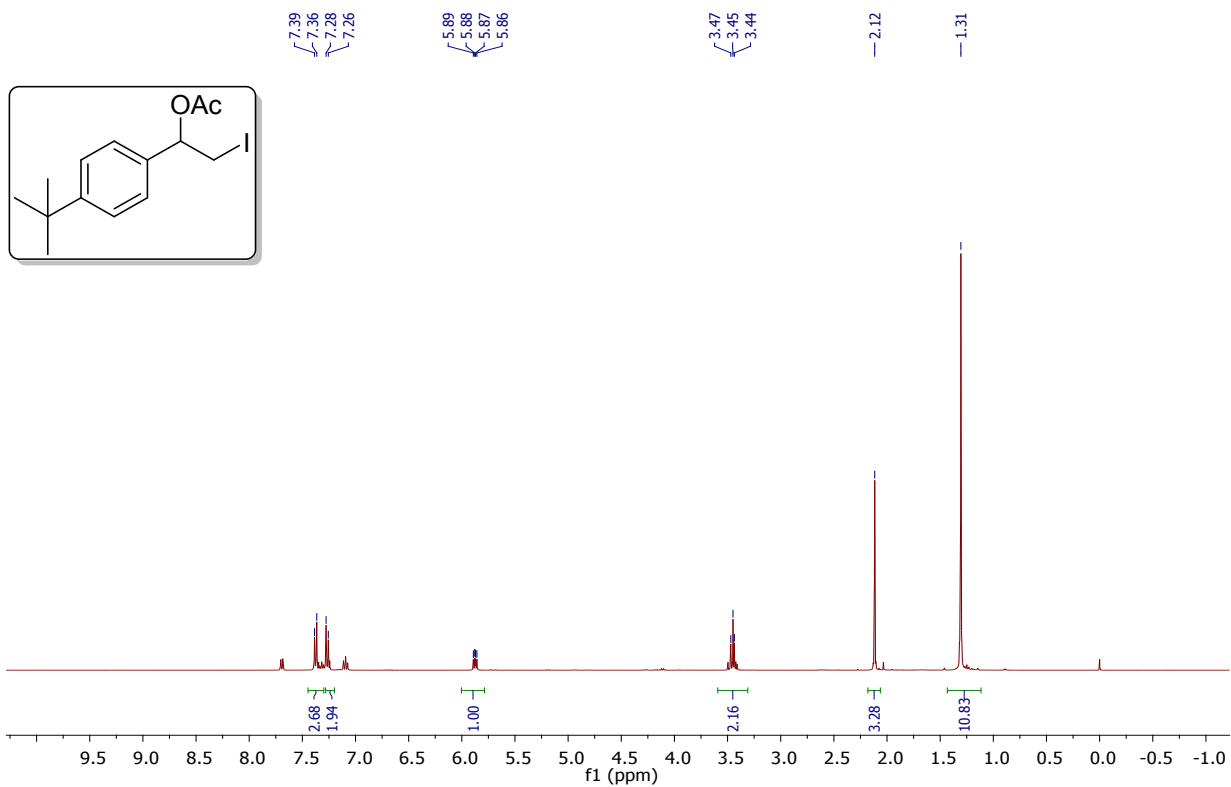

<sup>13</sup>C NMR Spectrum of compound **2e** in CDCl<sub>3</sub>

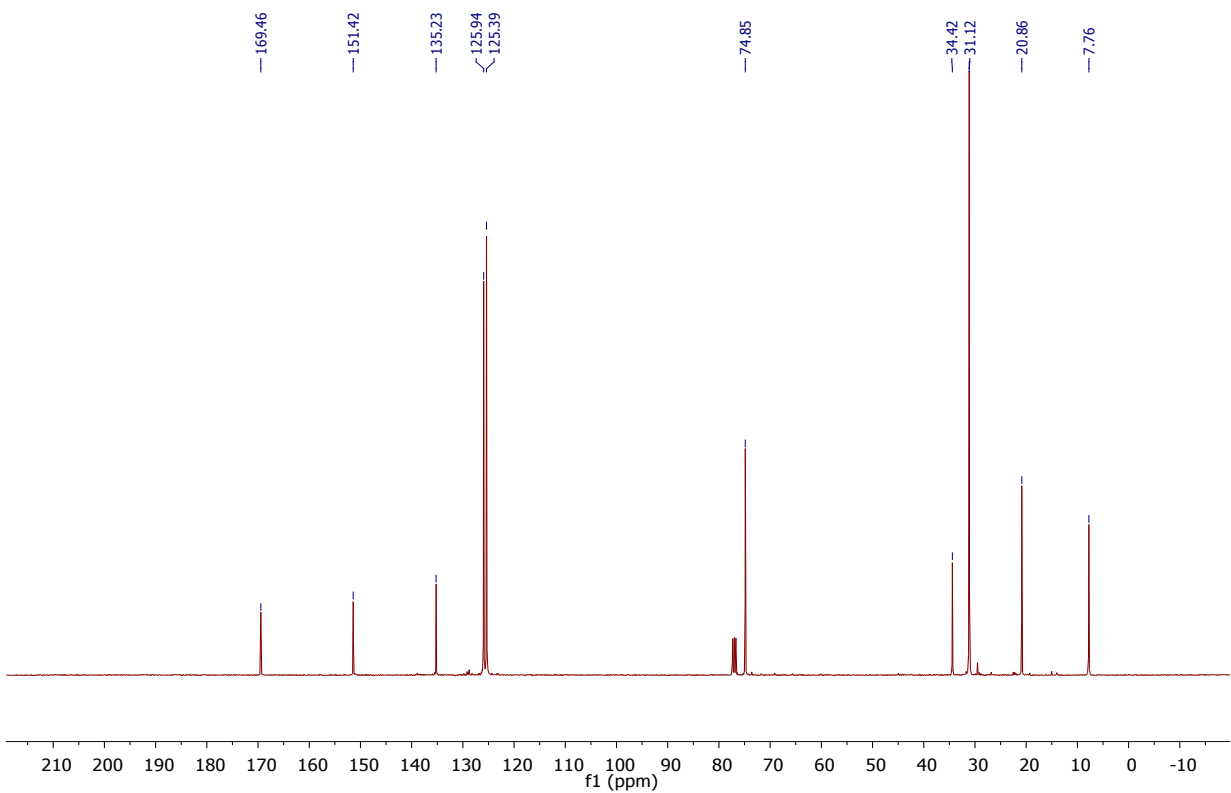

<sup>1</sup>H NMR Spectrum of compound **2f** in CDCl<sub>3</sub>

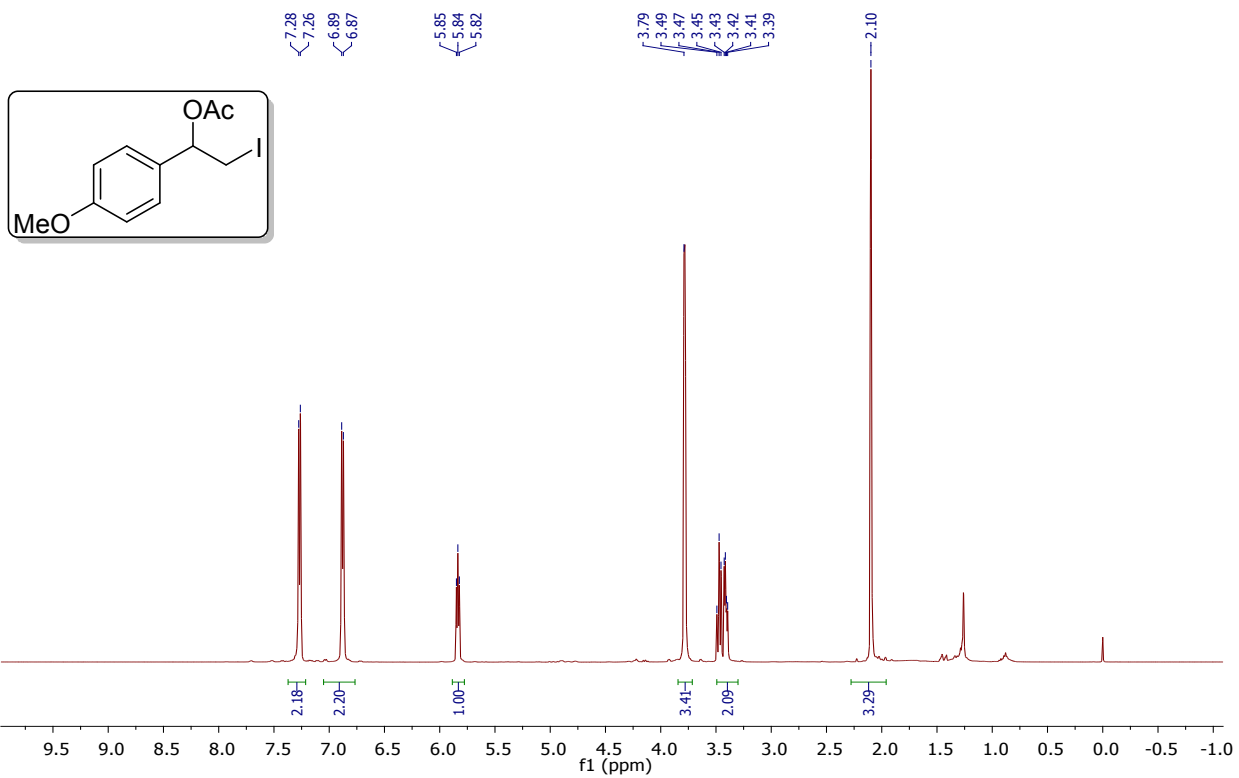

<sup>13</sup>C NMR Spectrum of compound **2f** in CDCl<sub>3</sub>

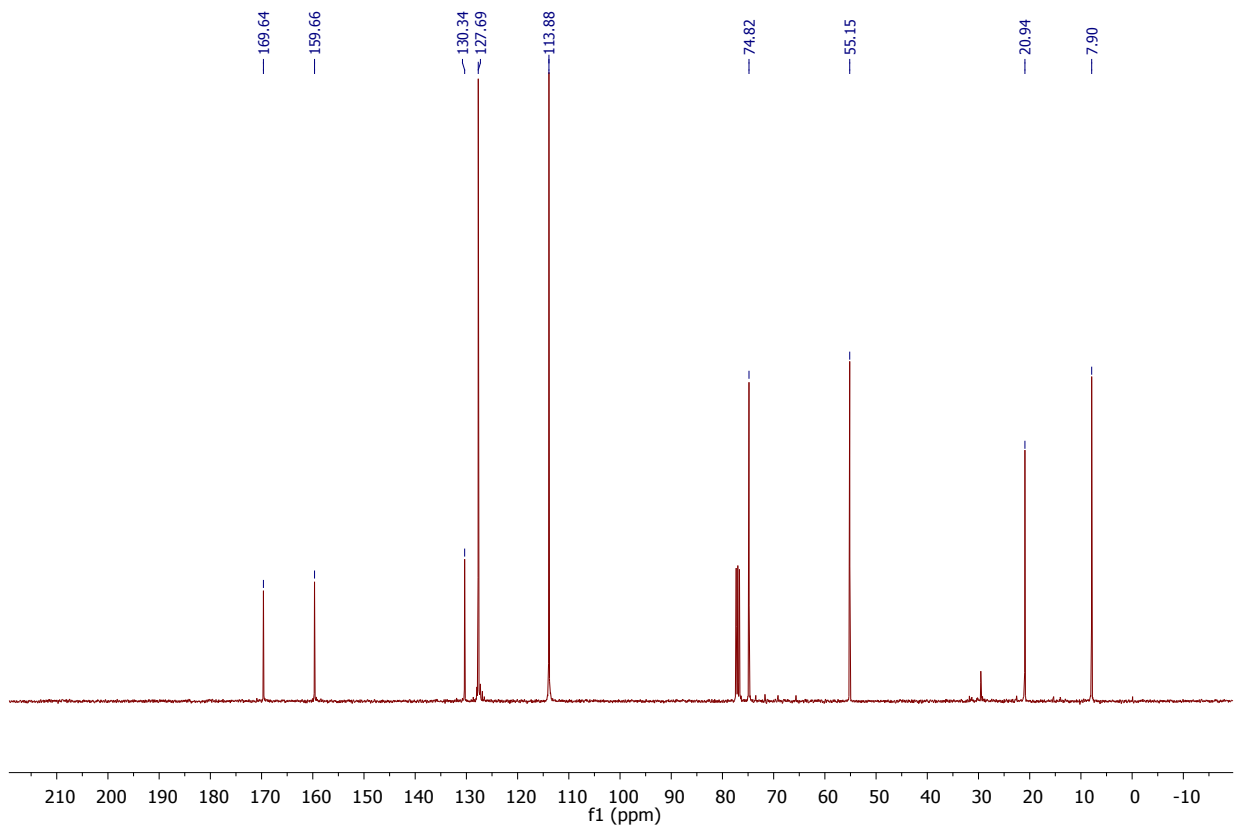

<sup>1</sup>H NMR Spectrum of compound **2g** in CDCl<sub>3</sub>

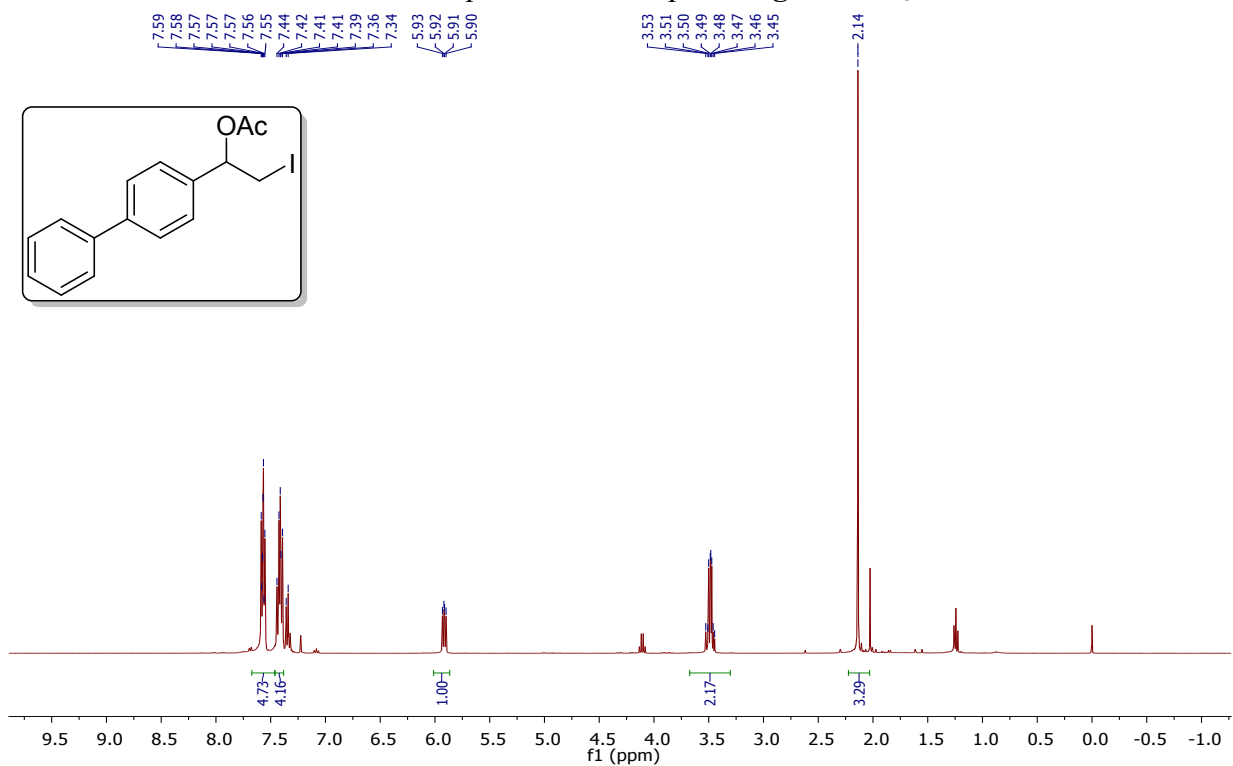

<sup>13</sup>C NMR Spectrum of compound **2g** in CDCl<sub>3</sub>

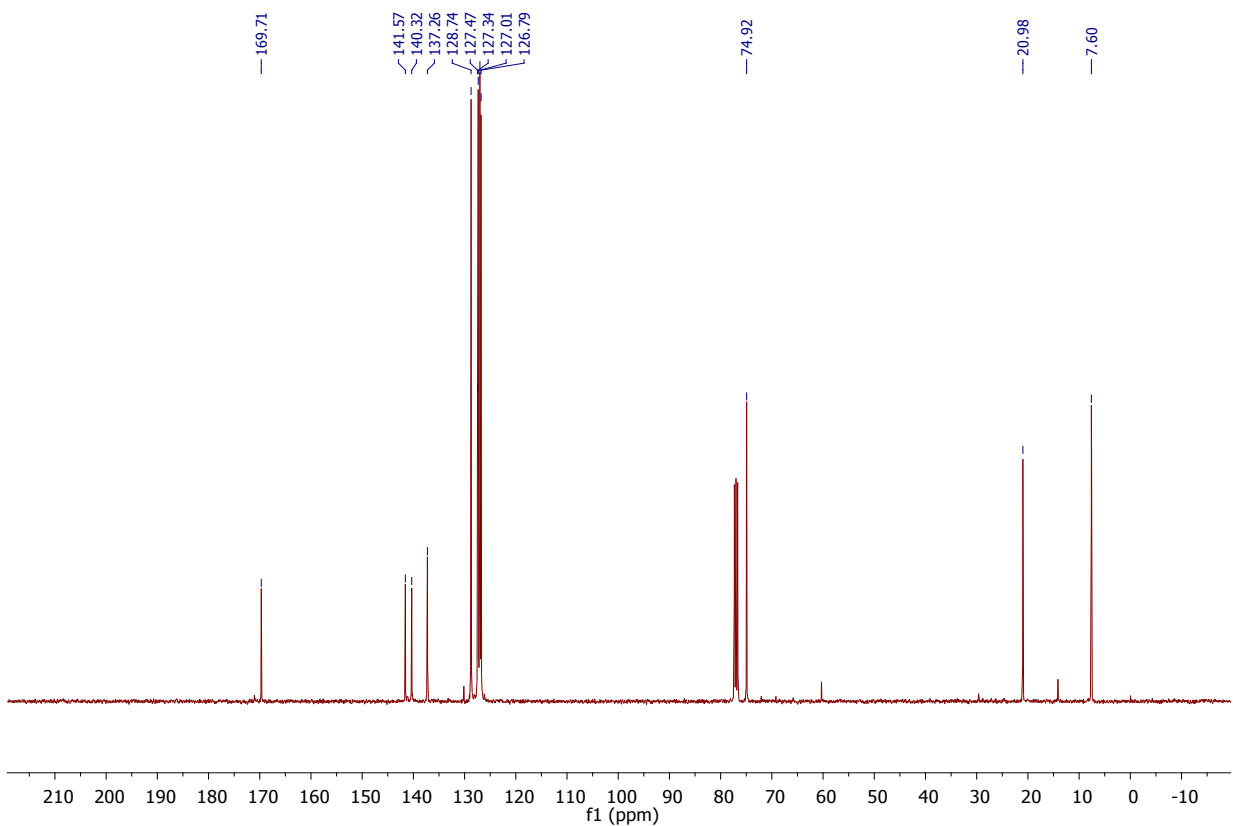



<sup>1</sup>H NMR Spectrum of compound **2h** in CDCl<sub>3</sub>

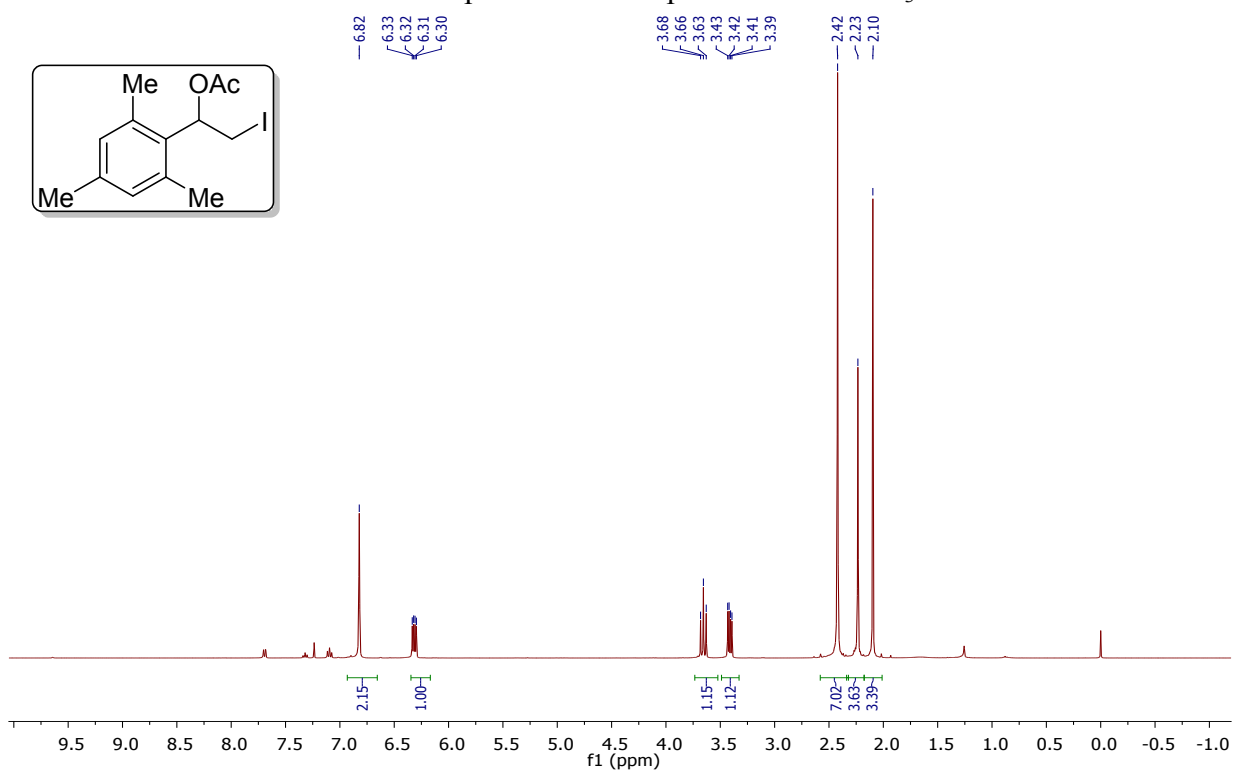

<sup>13</sup>C NMR Spectrum of compound **2h** in CDCl<sub>3</sub>

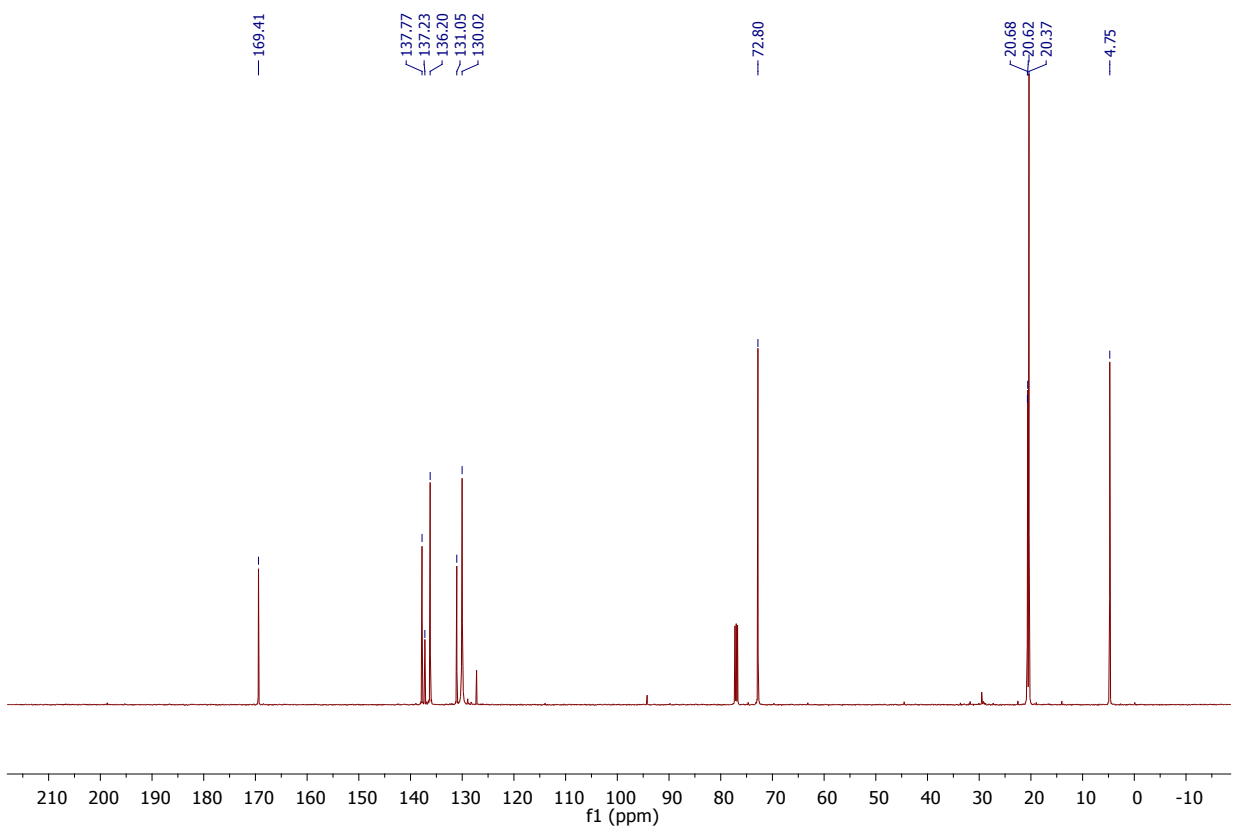

<sup>1</sup>H NMR Spectrum of compound **2i** in CDCl<sub>3</sub>

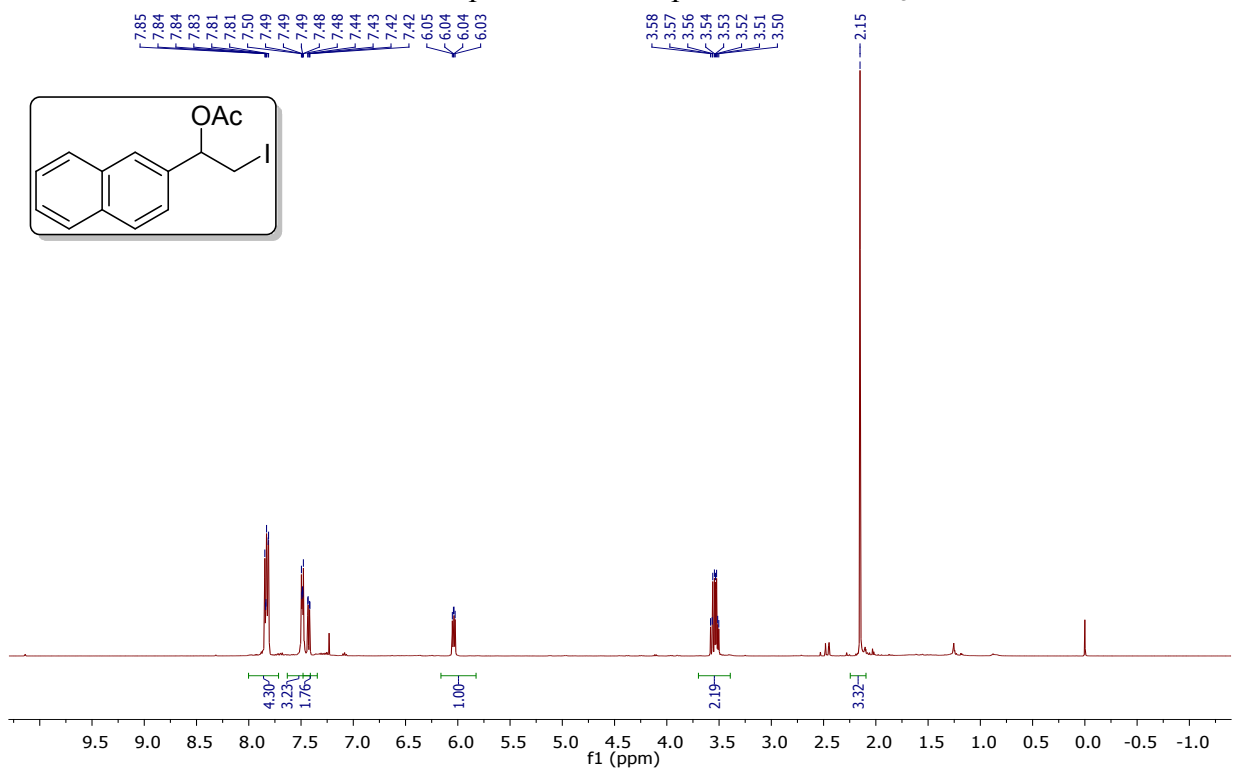

<sup>13</sup>C NMR Spectrum of compound **2i** in CDCl<sub>3</sub>

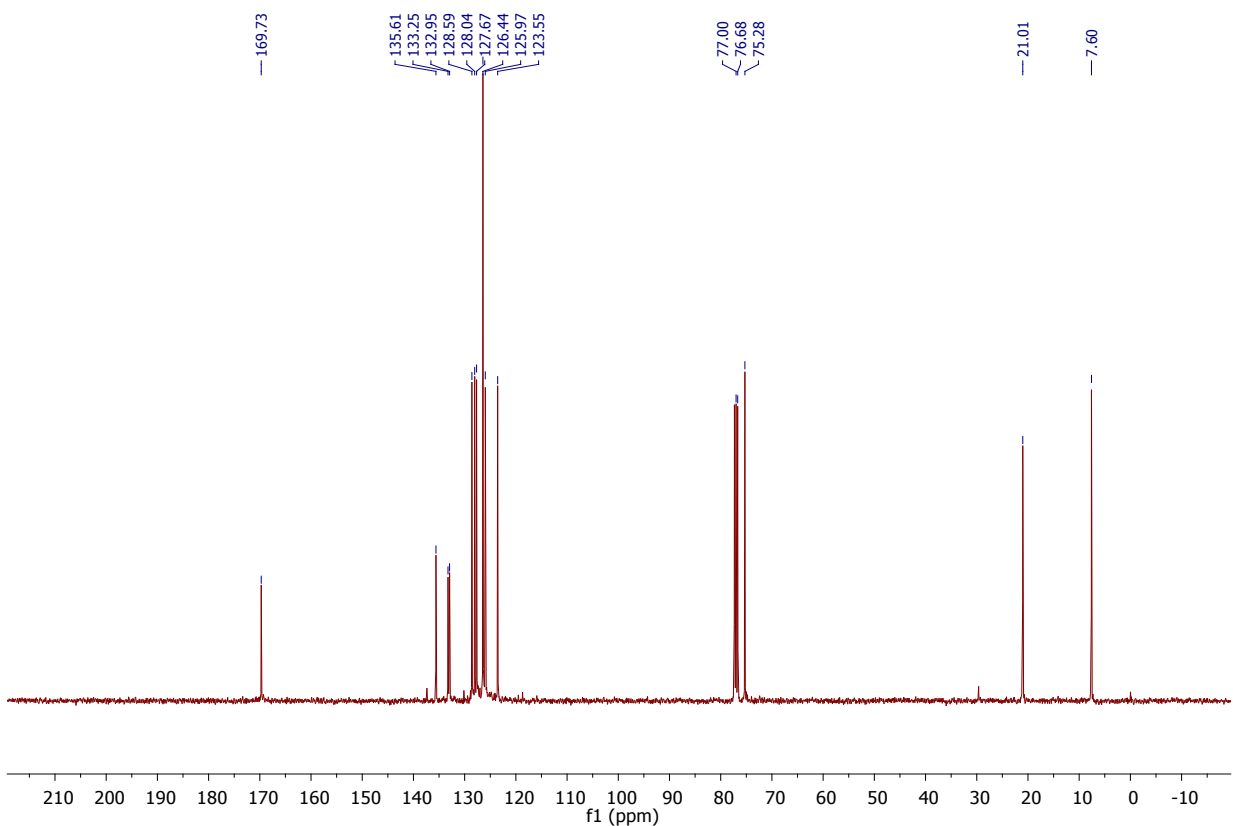



<sup>1</sup>H NMR Spectrum of compound **21** in CDCl<sub>3</sub>

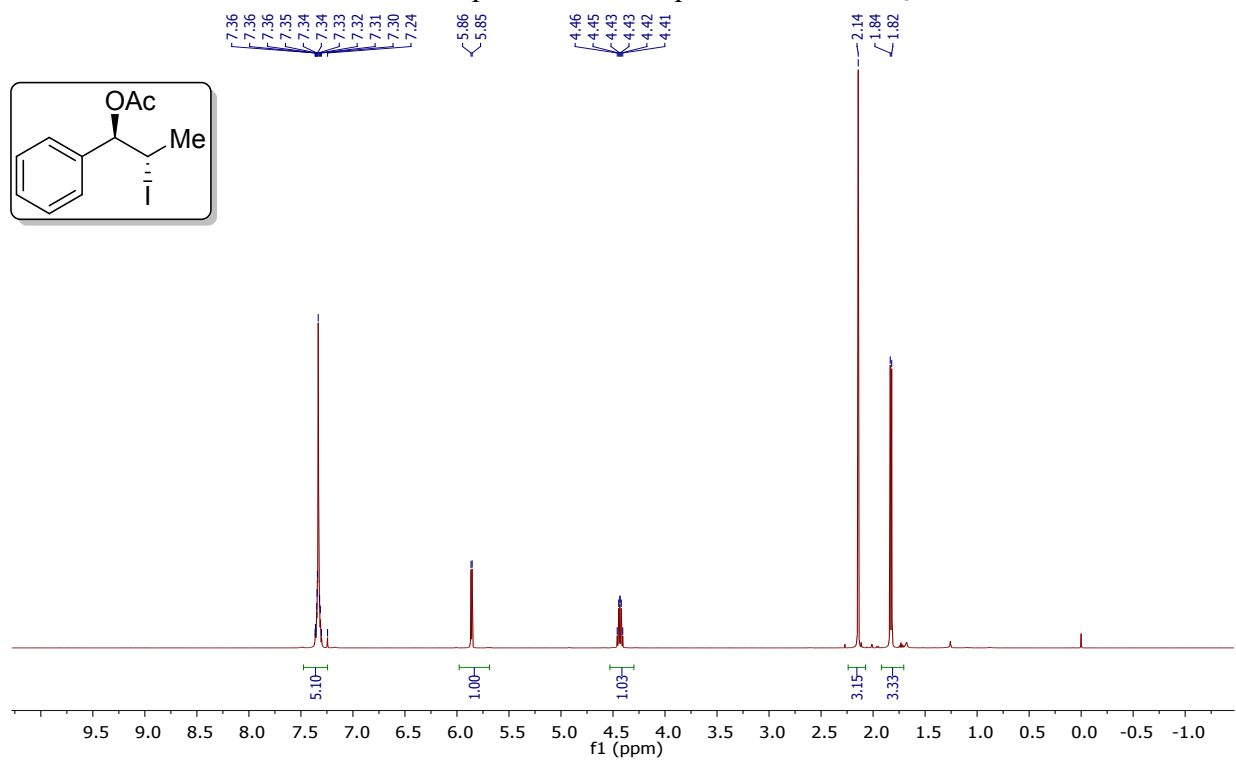

<sup>13</sup>C NMR Spectrum of compound **21** in CDCl<sub>3</sub>

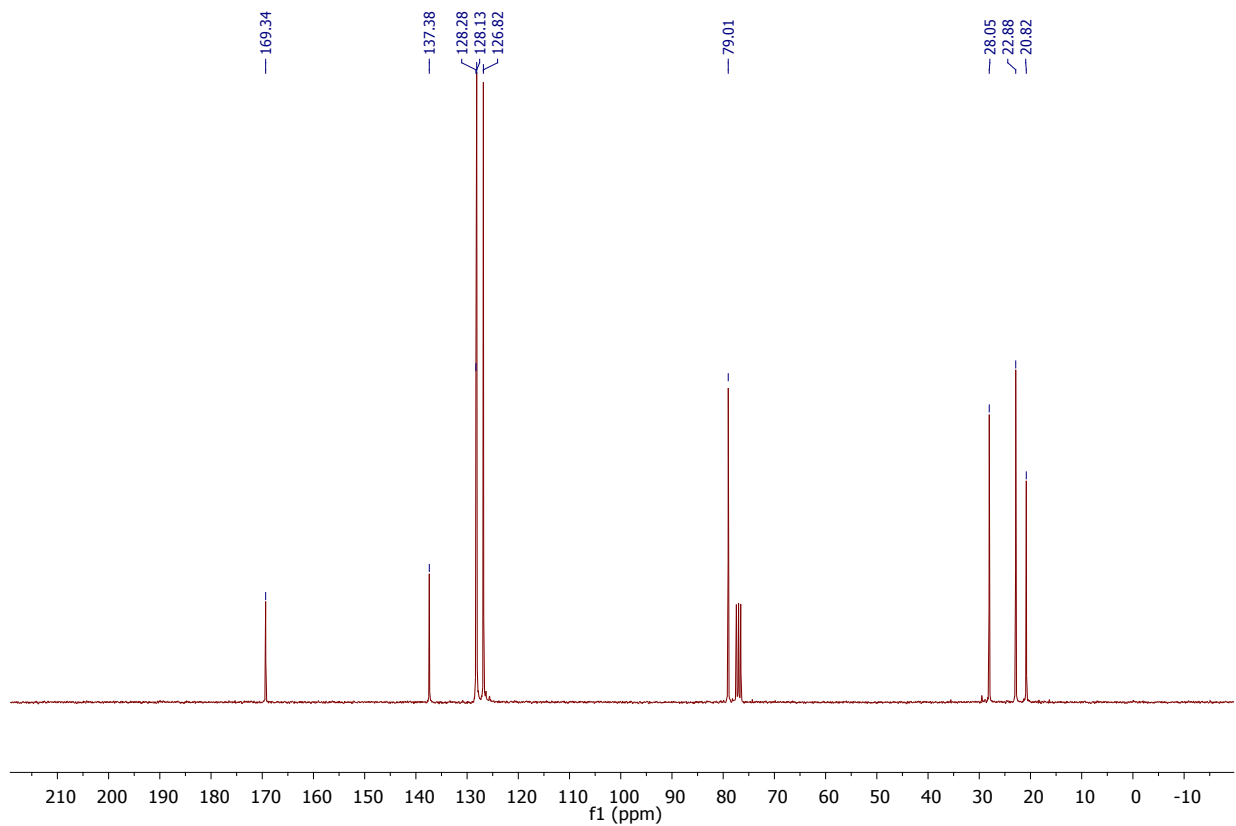

<sup>1</sup>H NMR Spectrum of compound **2m** in CDCl<sub>3</sub>

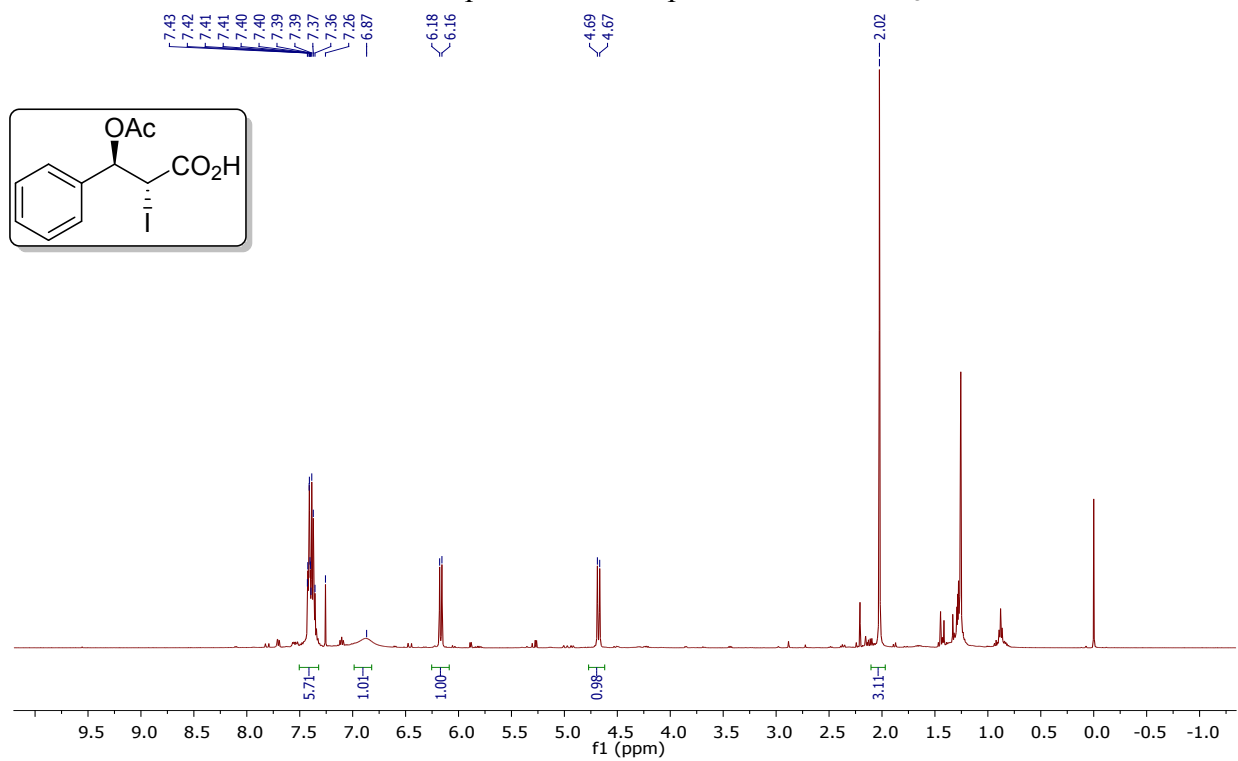

<sup>13</sup>C NMR Spectrum of compound **2m** in CDCl<sub>3</sub>

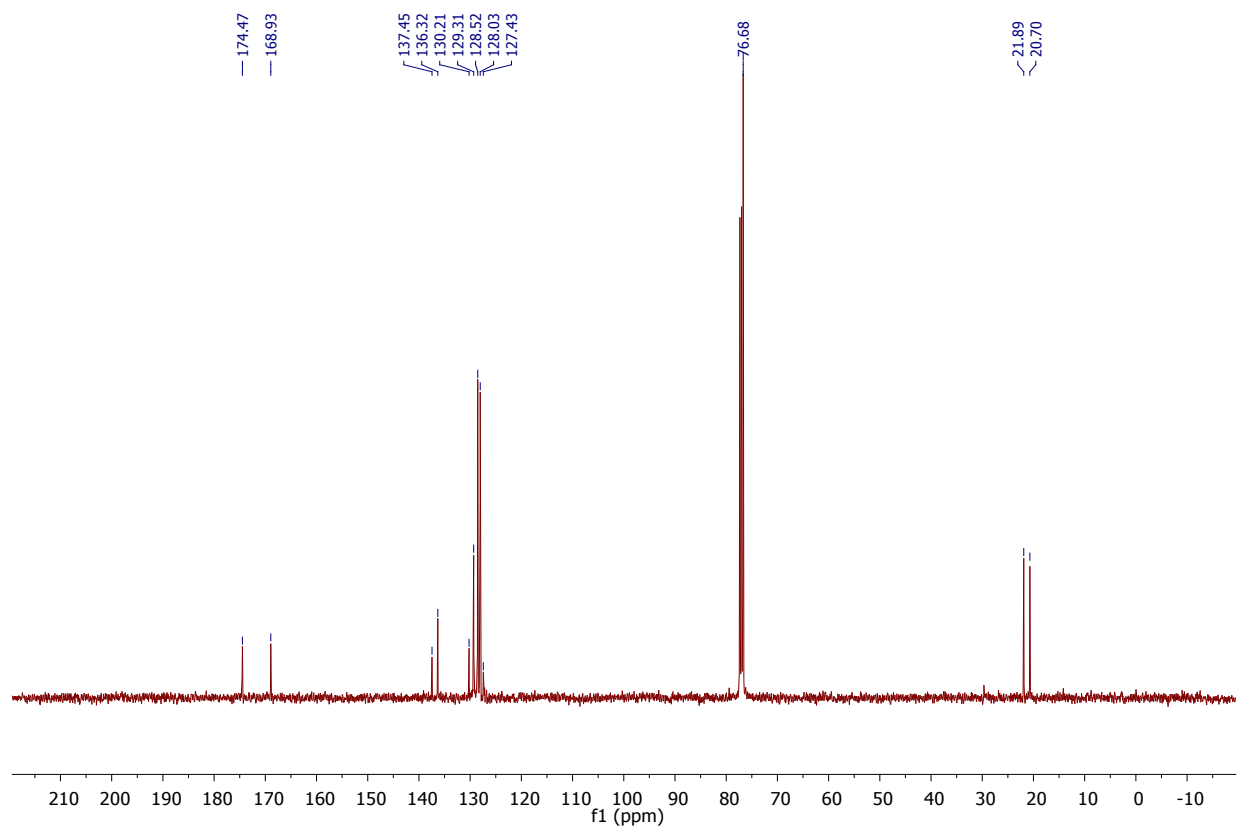

<sup>1</sup>H NMR Spectrum of compound **2n** in CDCl<sub>3</sub>

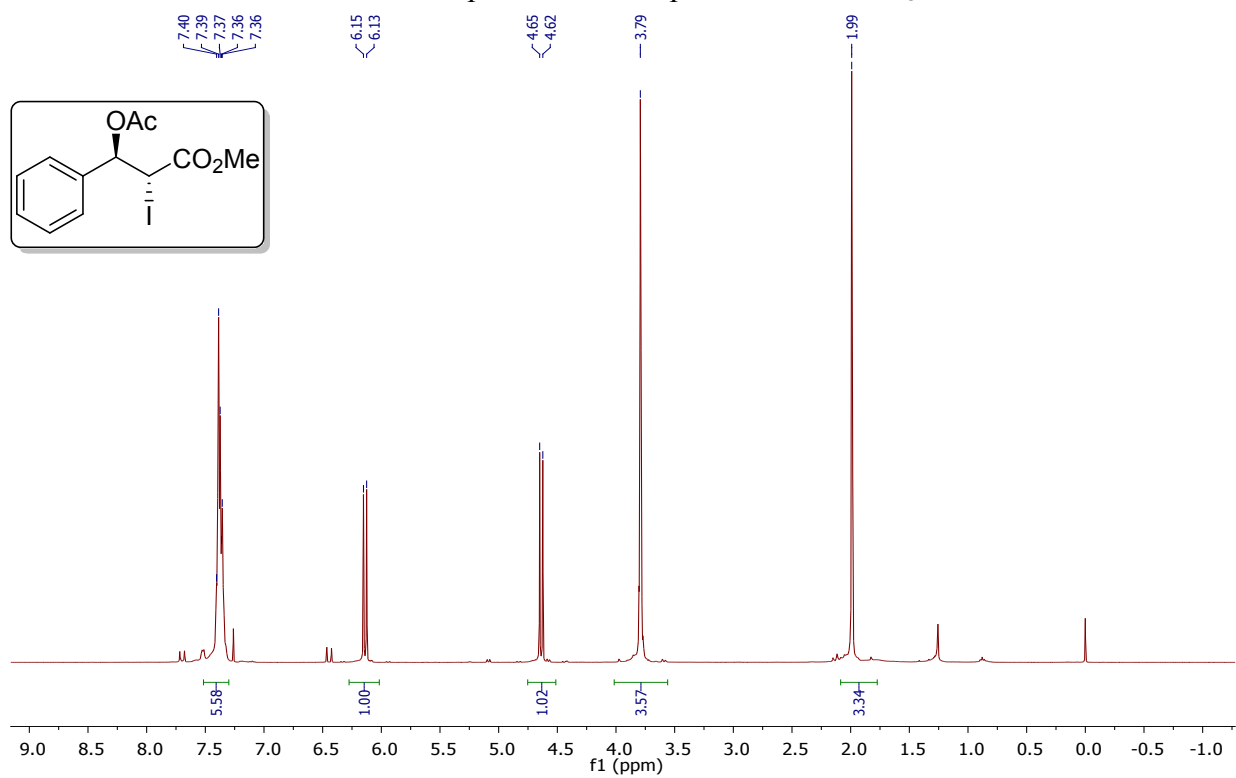

<sup>13</sup>C NMR Spectrum of compound **2n** in CDCl<sub>3</sub>

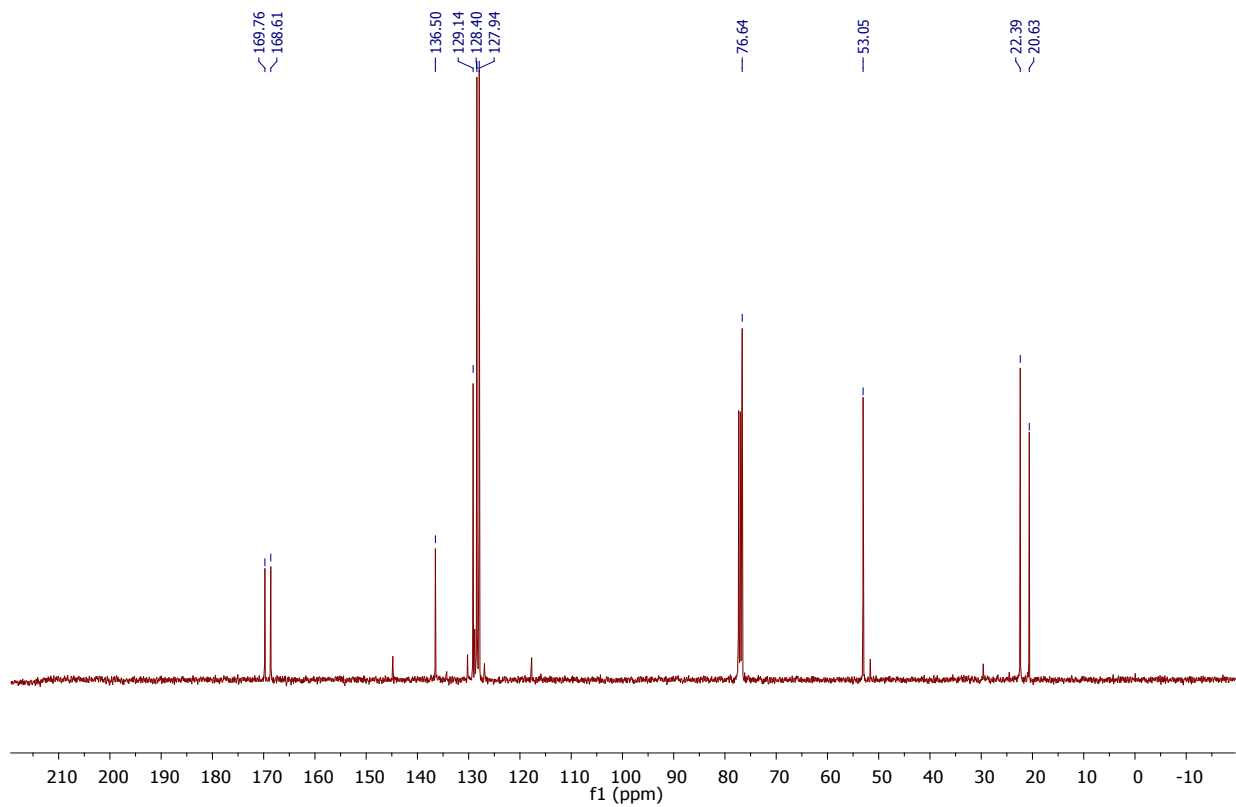

<sup>1</sup>H NMR Spectrum of compound **2o** in CDCl<sub>3</sub>

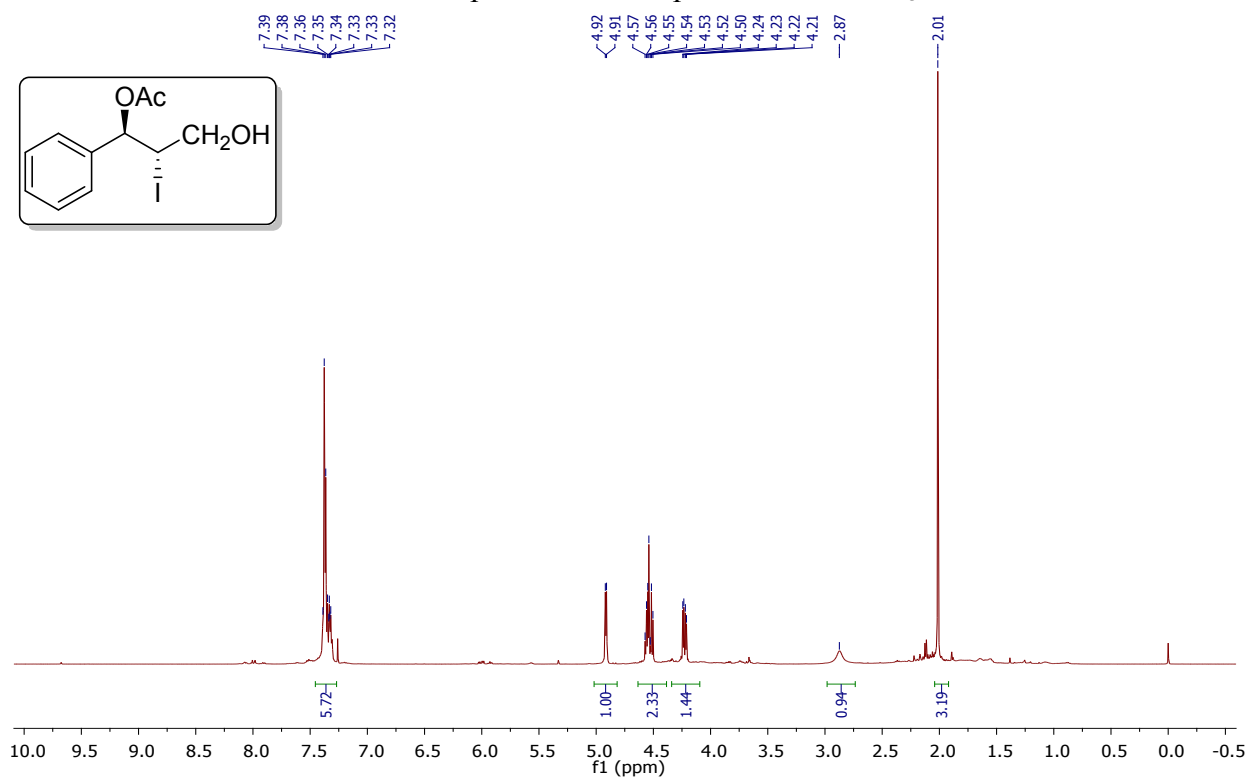

<sup>13</sup>C NMR Spectrum of compound **2o** in CDCl<sub>3</sub>

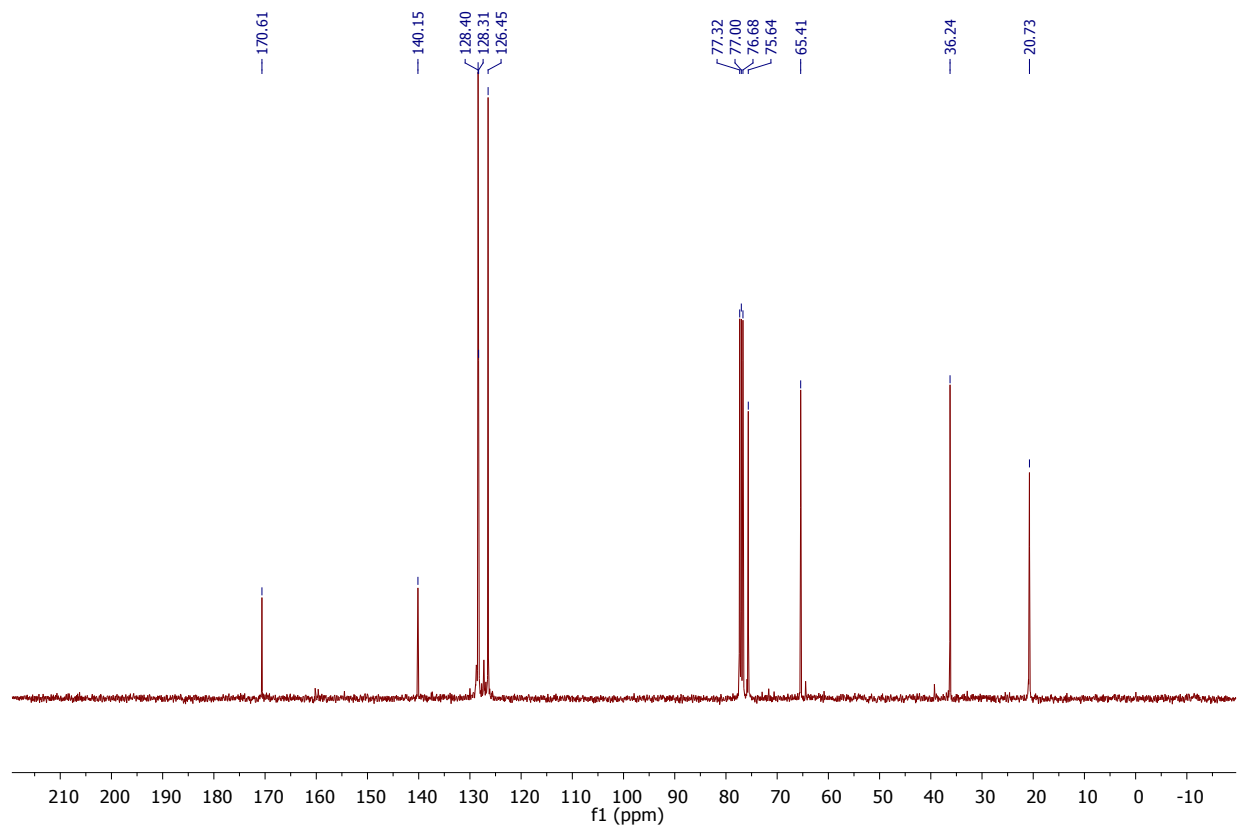

<sup>1</sup>H NMR Spectrum of compound **2p** in CDCl<sub>3</sub>

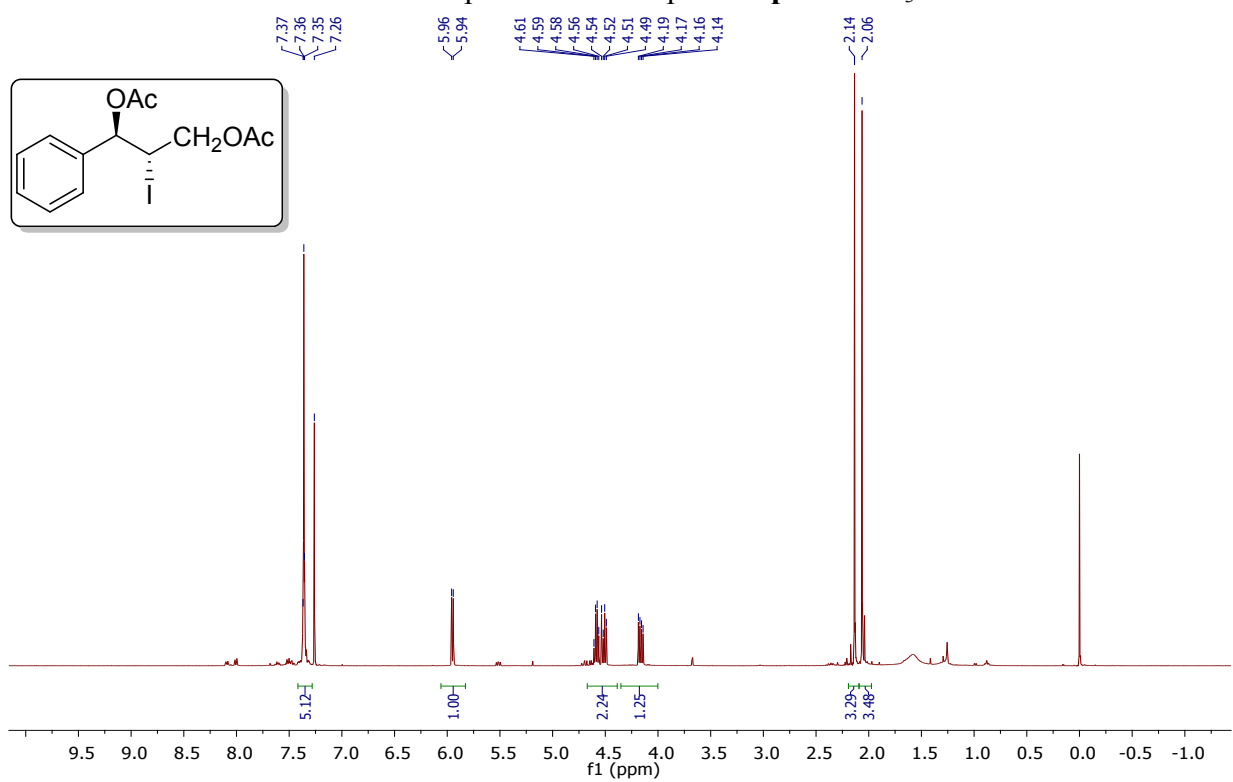

<sup>13</sup>C NMR Spectrum of compound **2p** in CDCl<sub>3</sub>

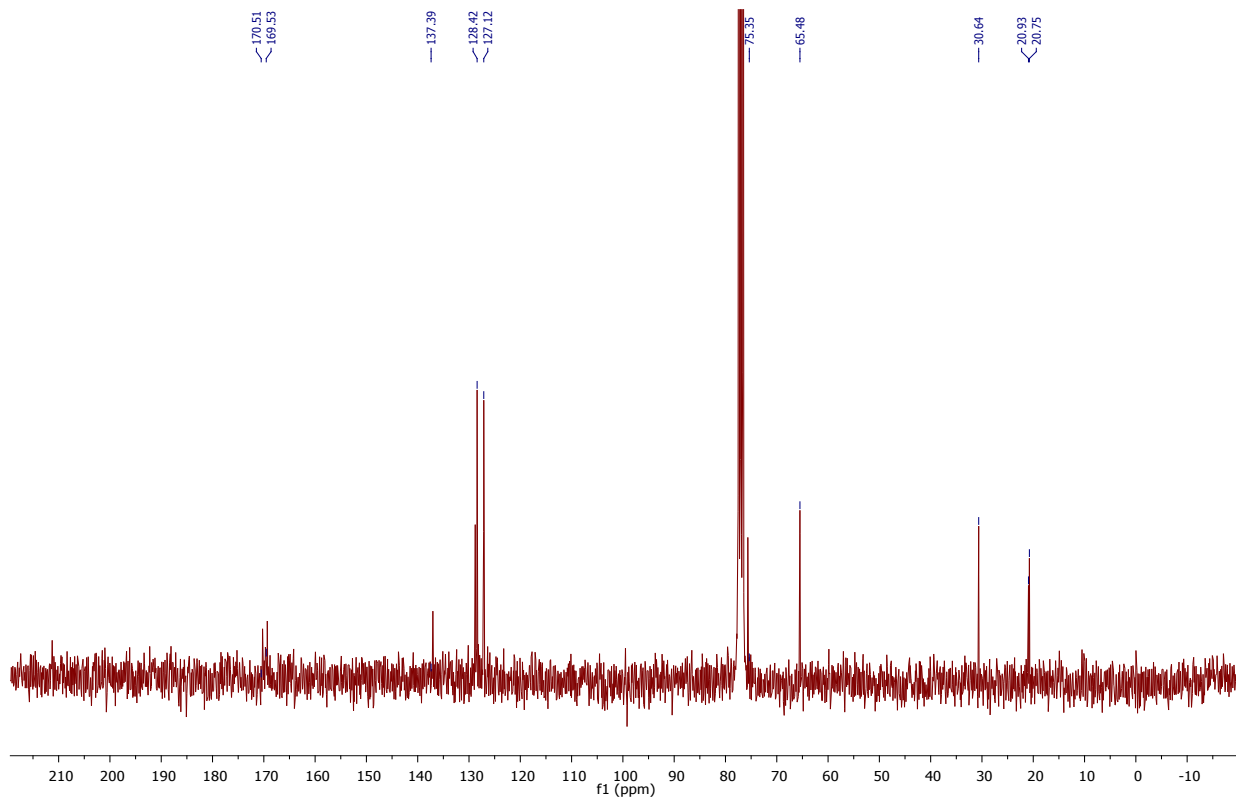



<sup>1</sup>H NMR Spectrum of compound **2s** in CDCl<sub>3</sub>

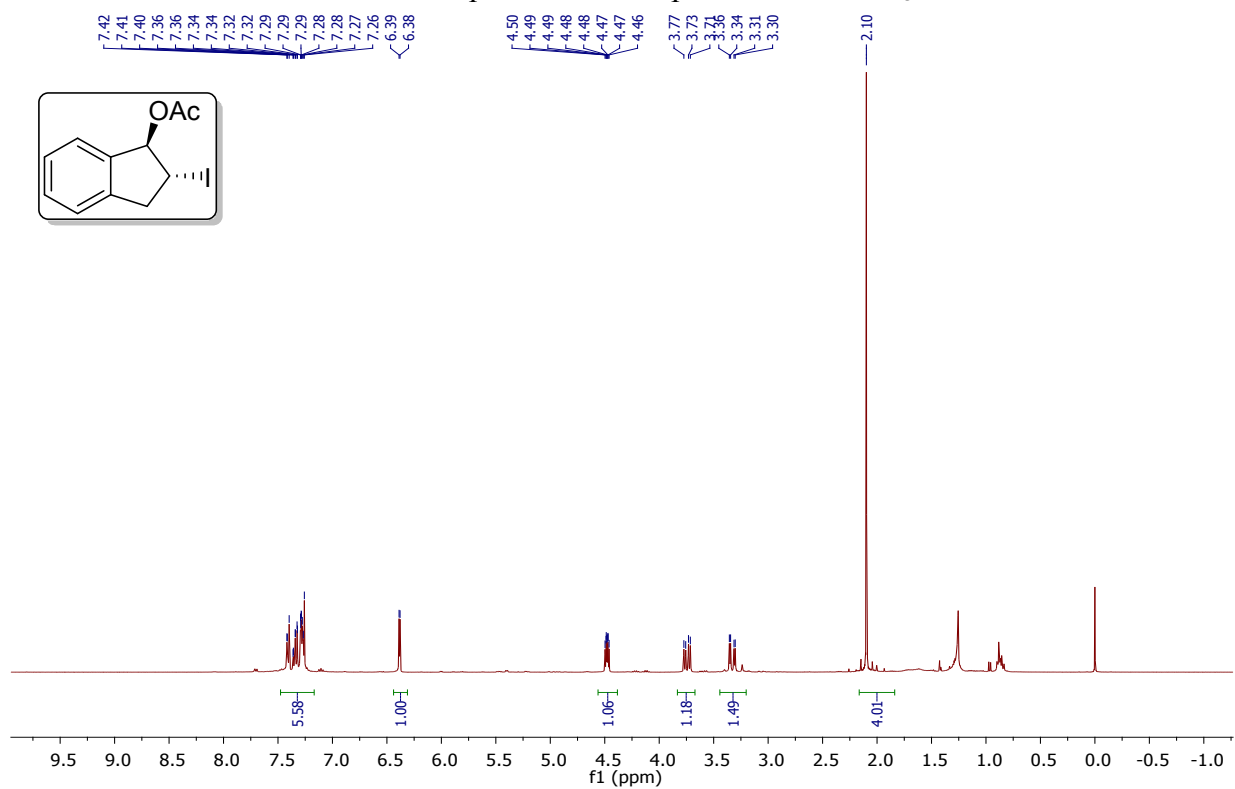

<sup>13</sup>C NMR Spectrum of compound **2s** in CDCl<sub>3</sub>

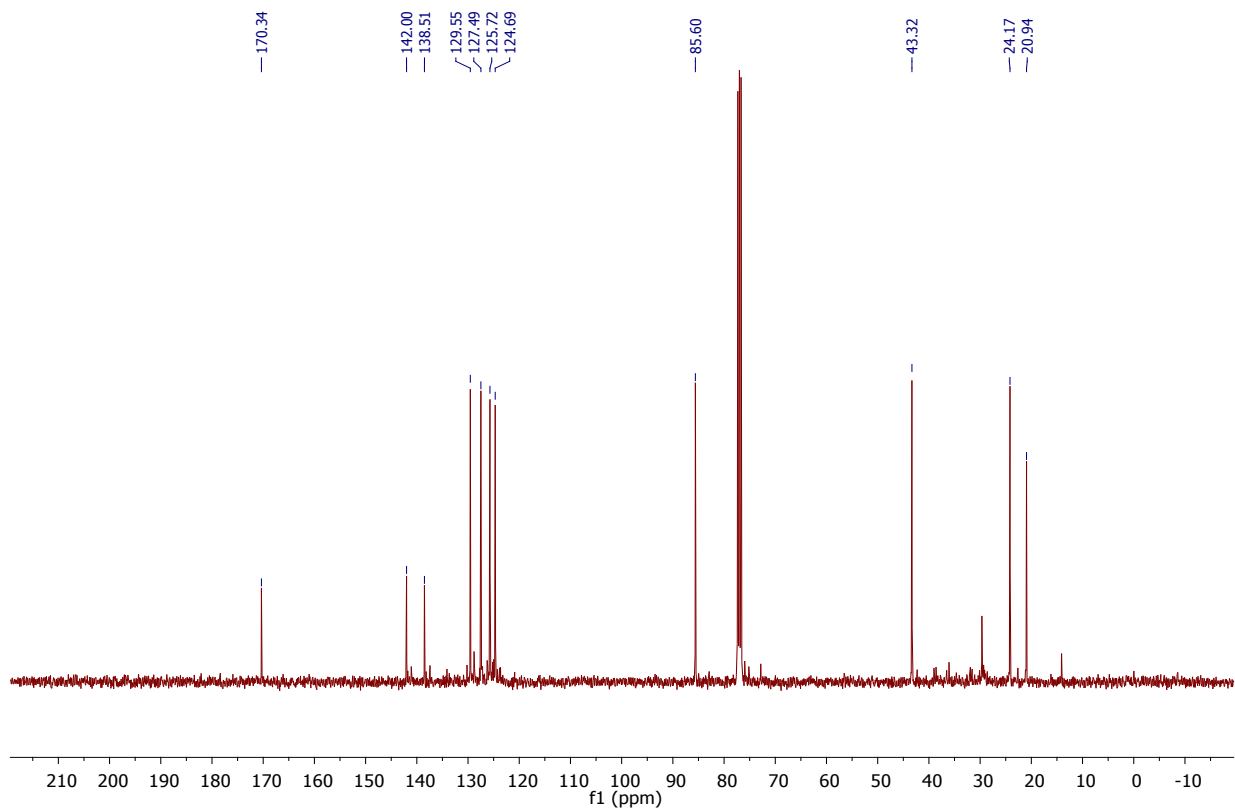

<sup>1</sup>H NMR Spectrum of compound **2t** in CDCl<sub>3</sub>

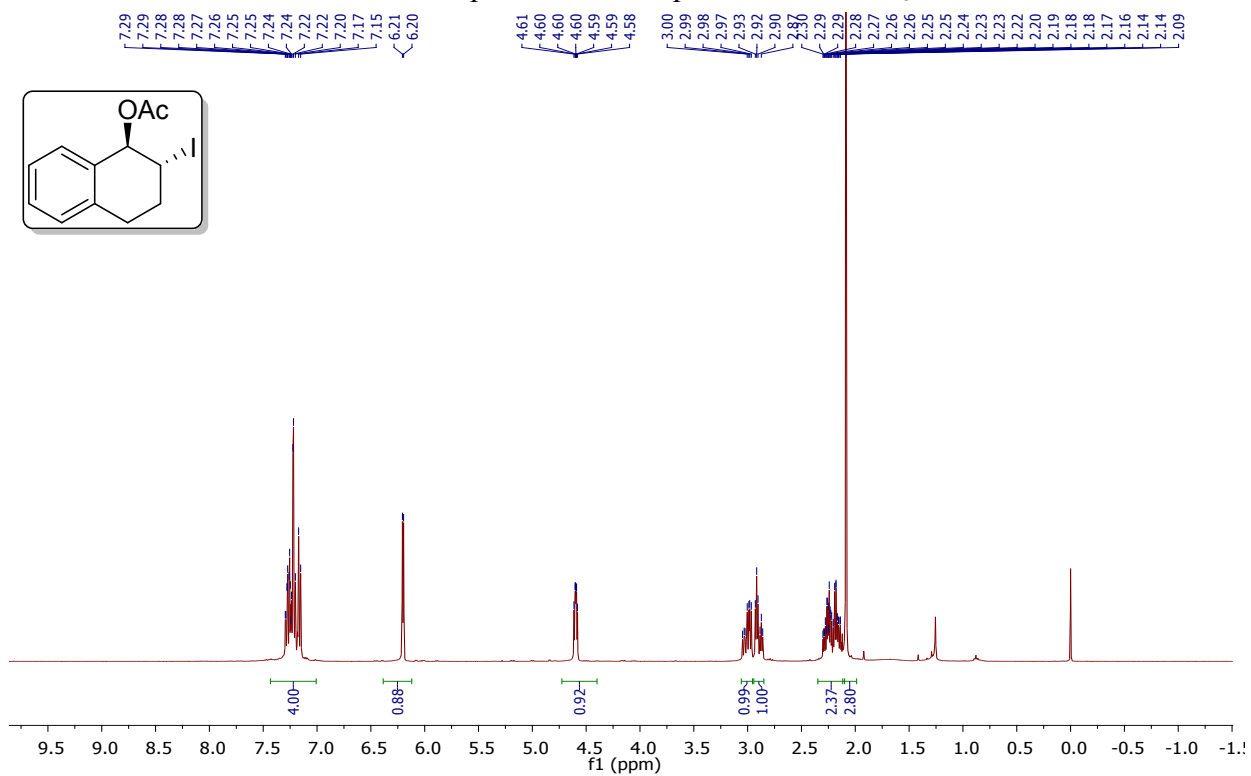

<sup>13</sup>C NMR Spectrum of compound **2t** in CDCl<sub>3</sub>

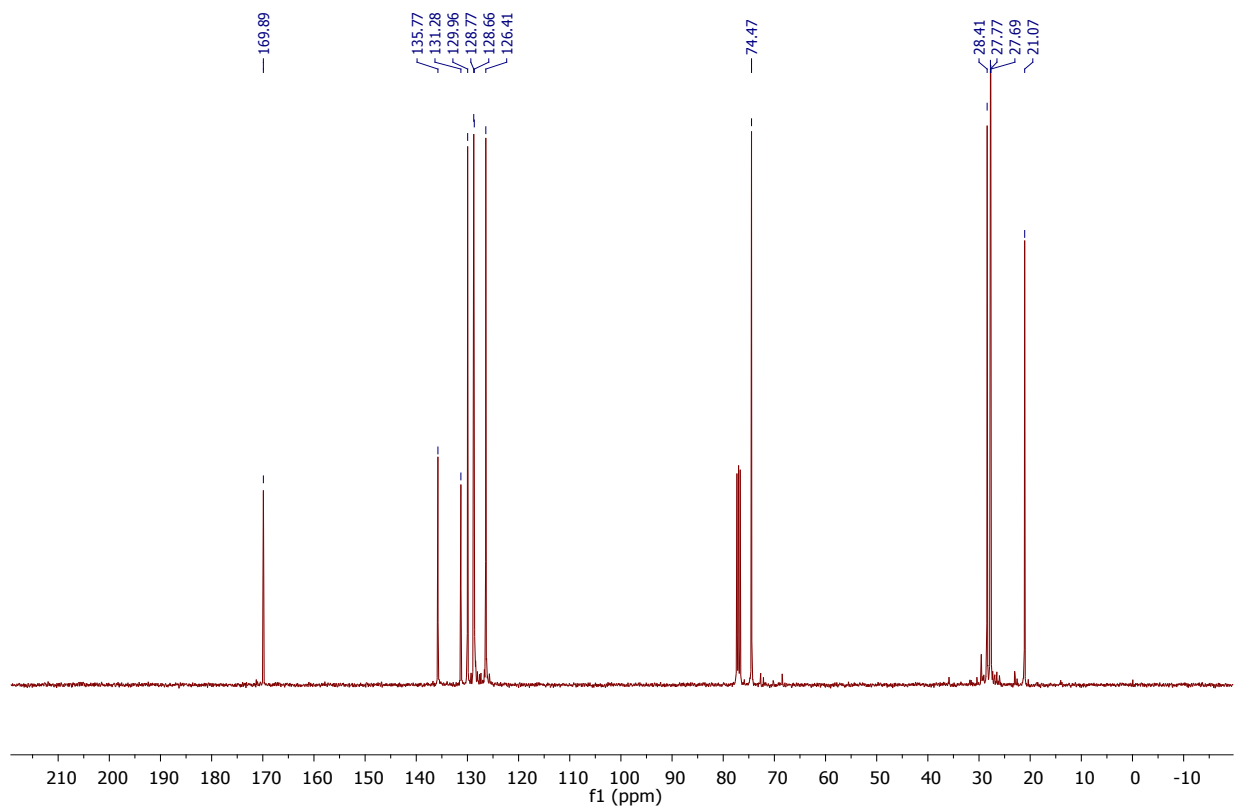

<sup>1</sup>H NMR Spectrum of compound **2u** in CDCl<sub>3</sub>

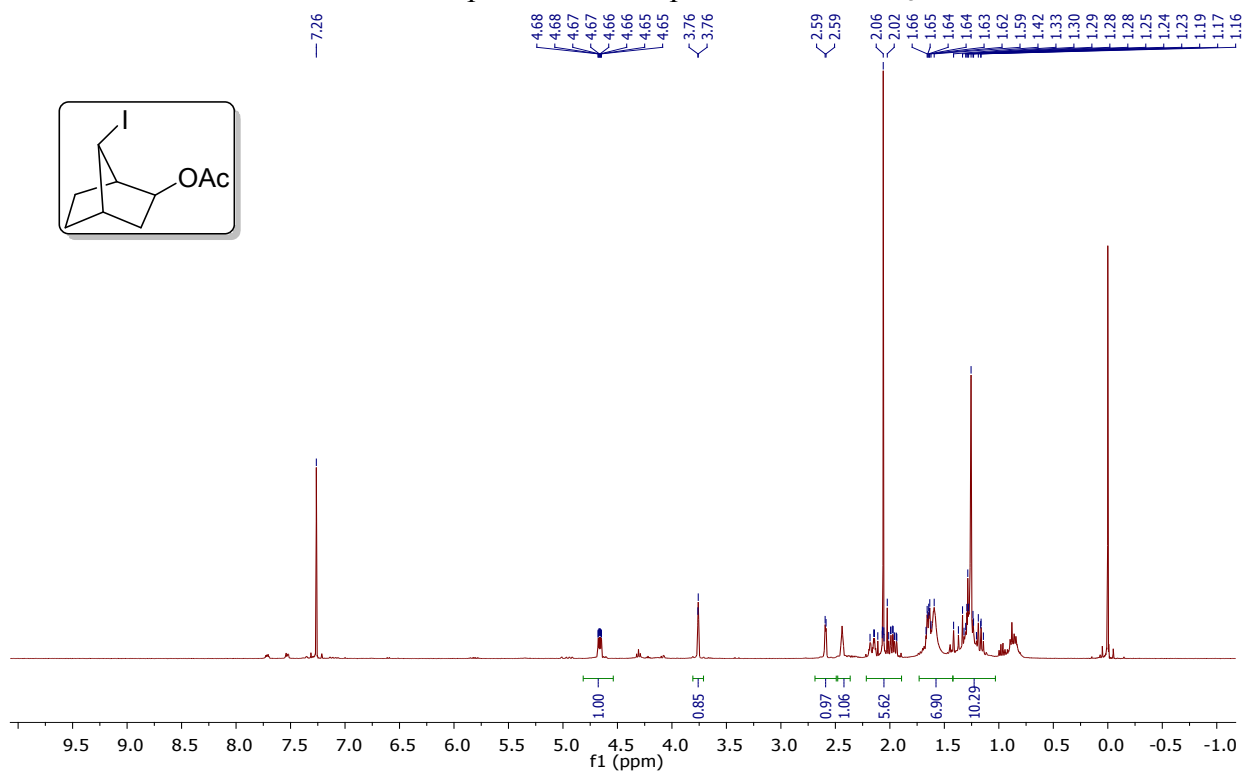

<sup>13</sup>C NMR Spectrum of compound **2u** in CDCl<sub>3</sub>

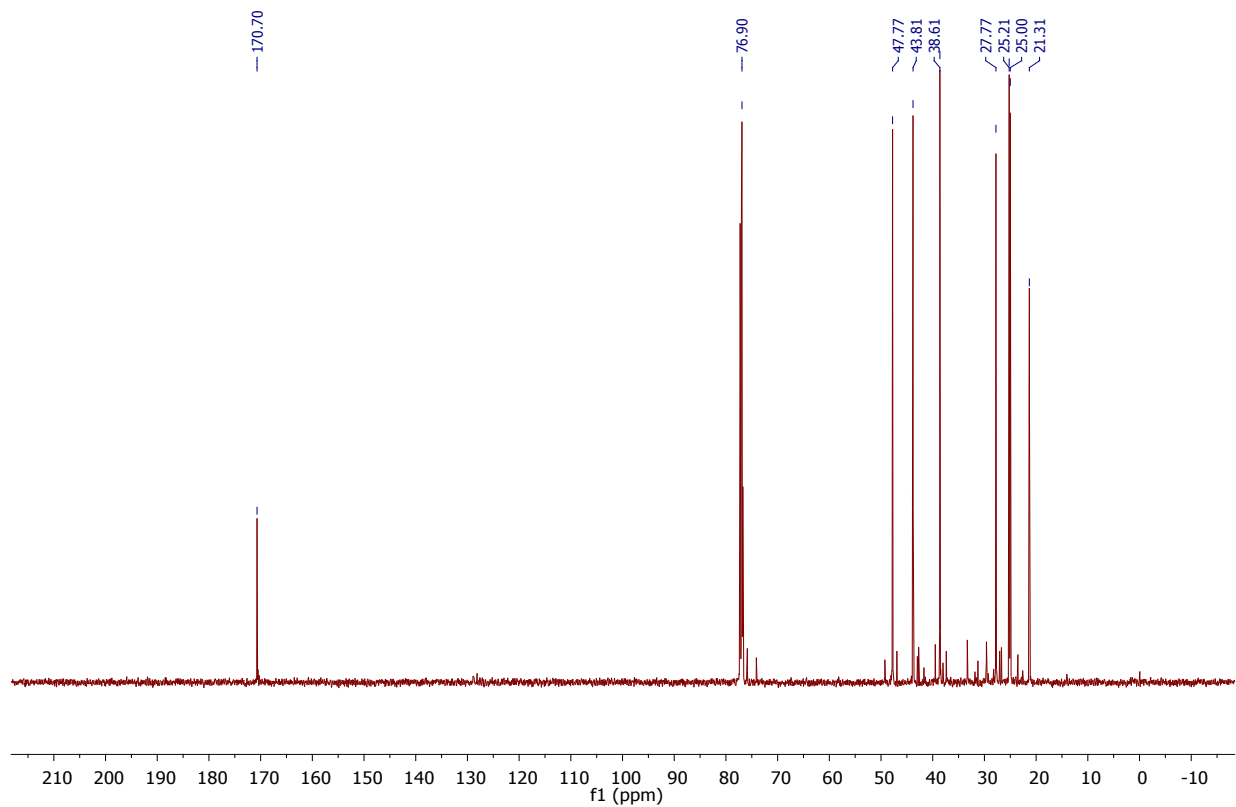

<sup>1</sup>H NMR Spectrum of compound **2v** in CDCl<sub>3</sub>

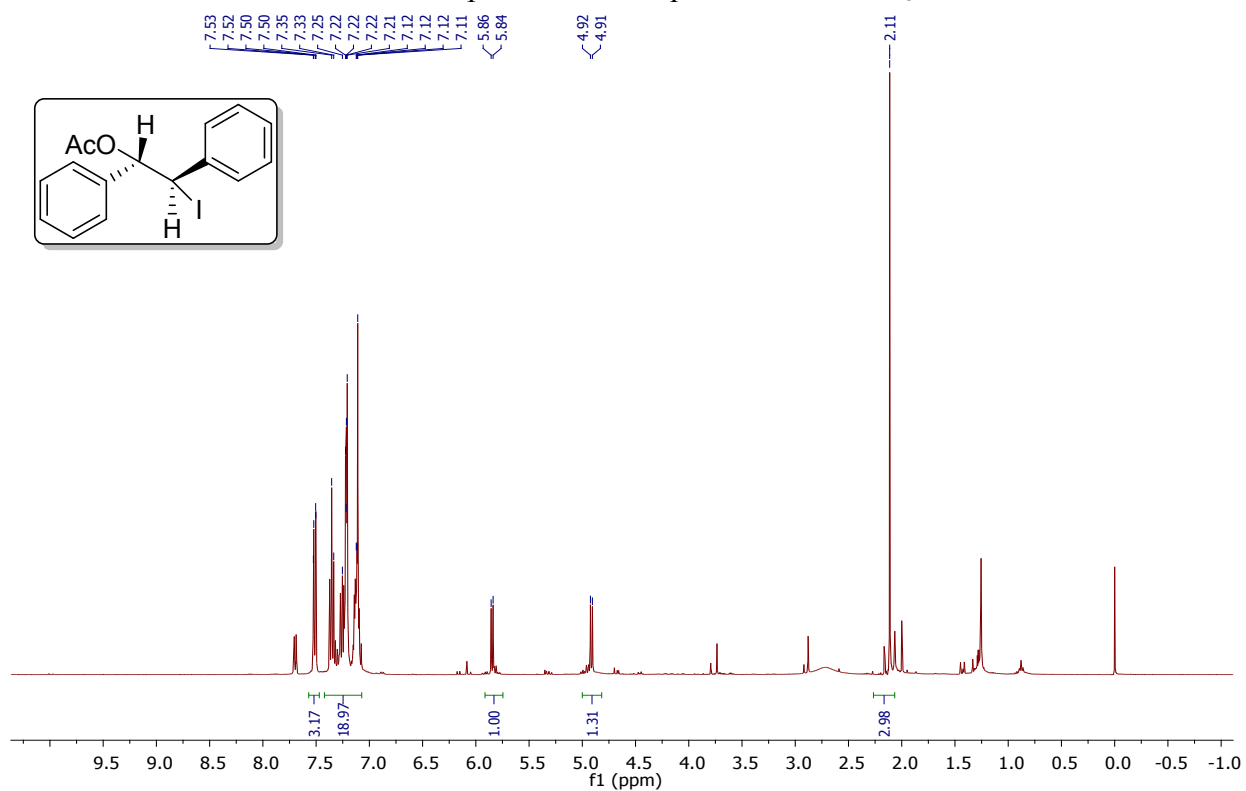

<sup>13</sup>C NMR Spectrum of compound **2v** in CDCl<sub>3</sub>

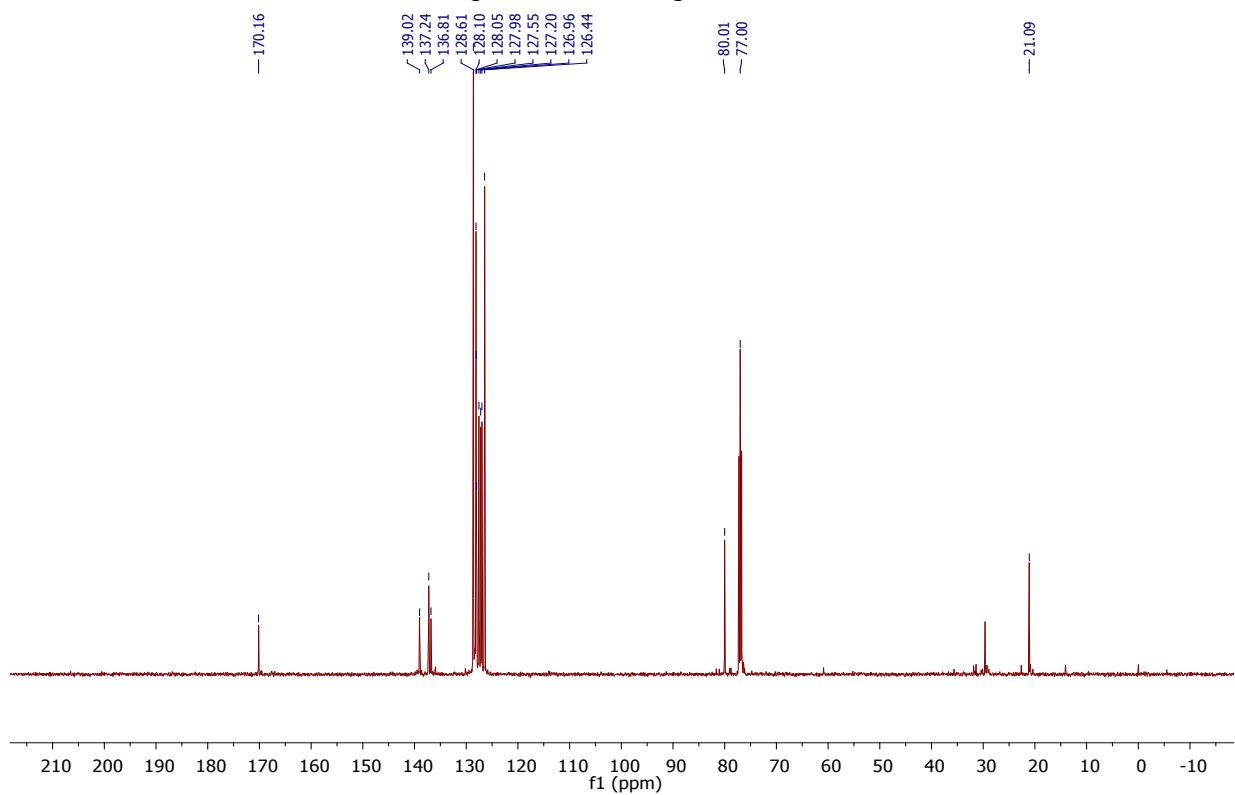

<sup>1</sup>H NMR Spectrum of compound **2w** in CDCl<sub>3</sub>

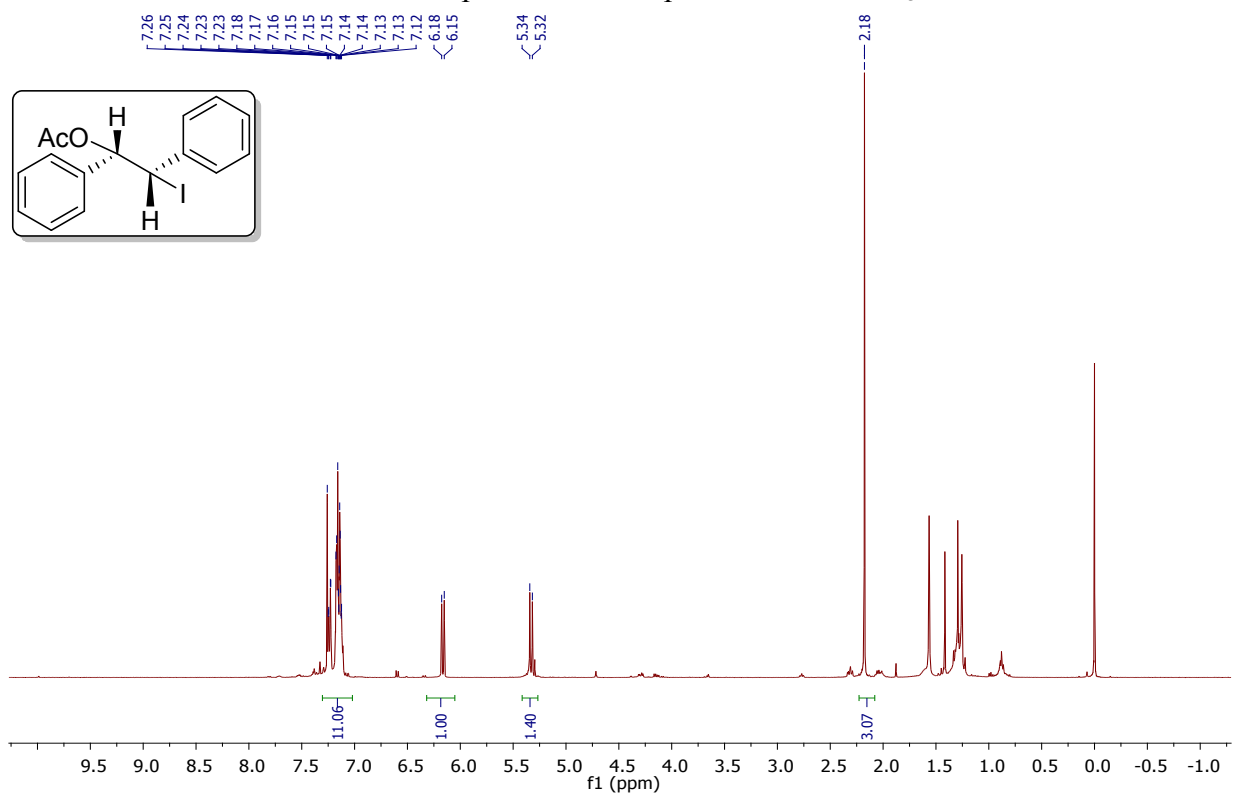

<sup>13</sup>C NMR Spectrum of compound **2w** in CDCl<sub>3</sub>

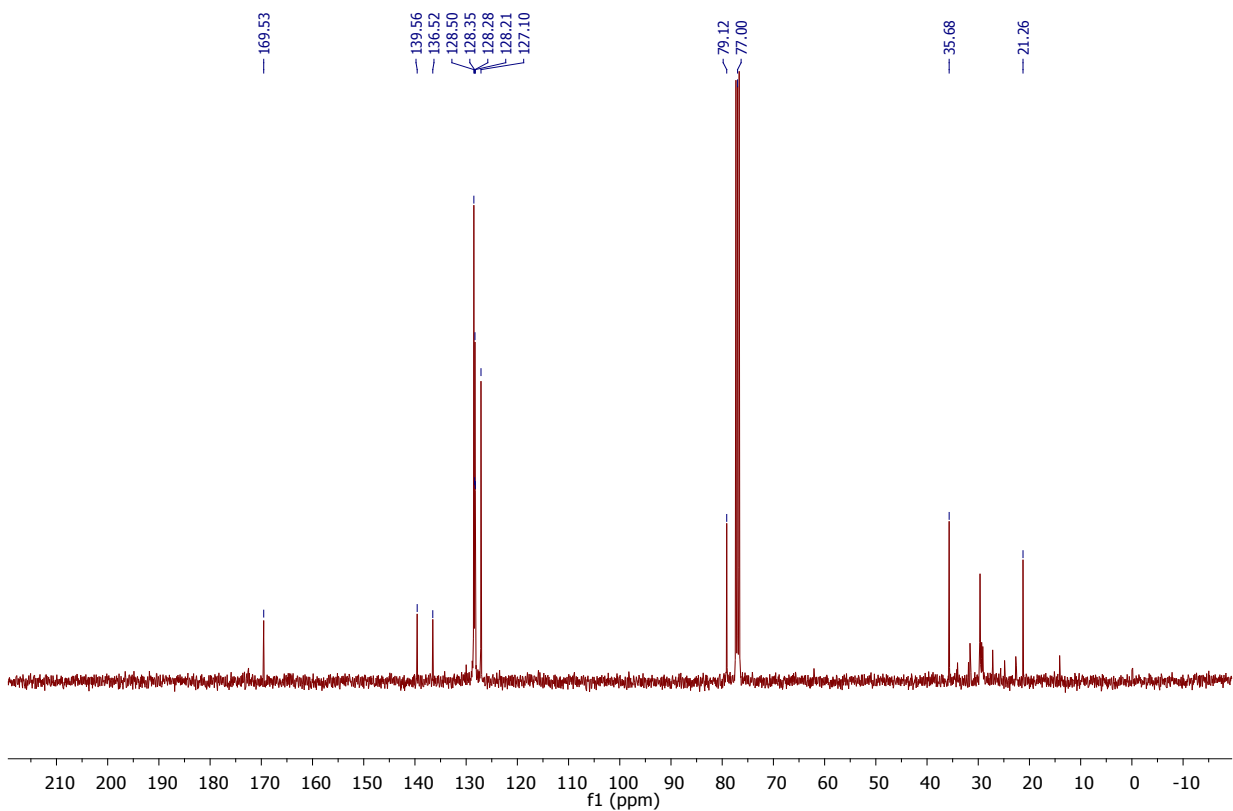

<sup>1</sup>H NMR Spectrum of compound **2x** in CDCl<sub>3</sub>

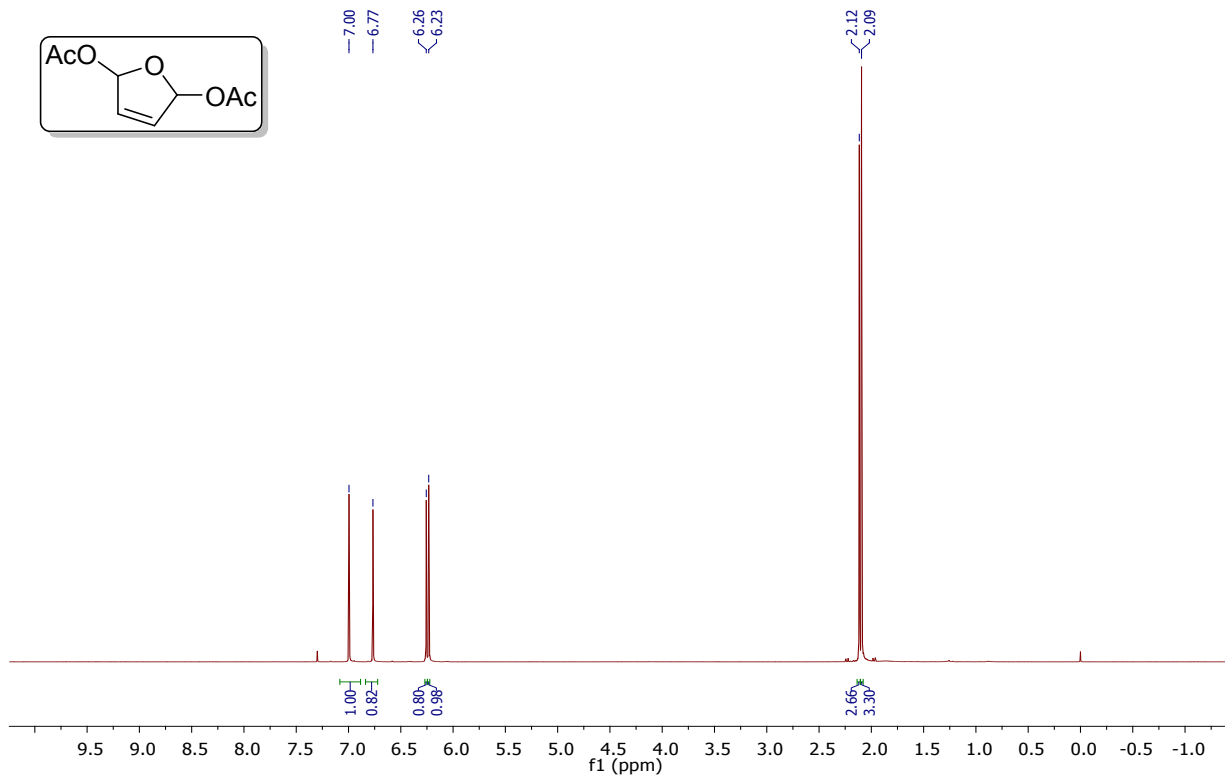

<sup>13</sup>C NMR Spectrum of compound **2x** in CDCl<sub>3</sub>

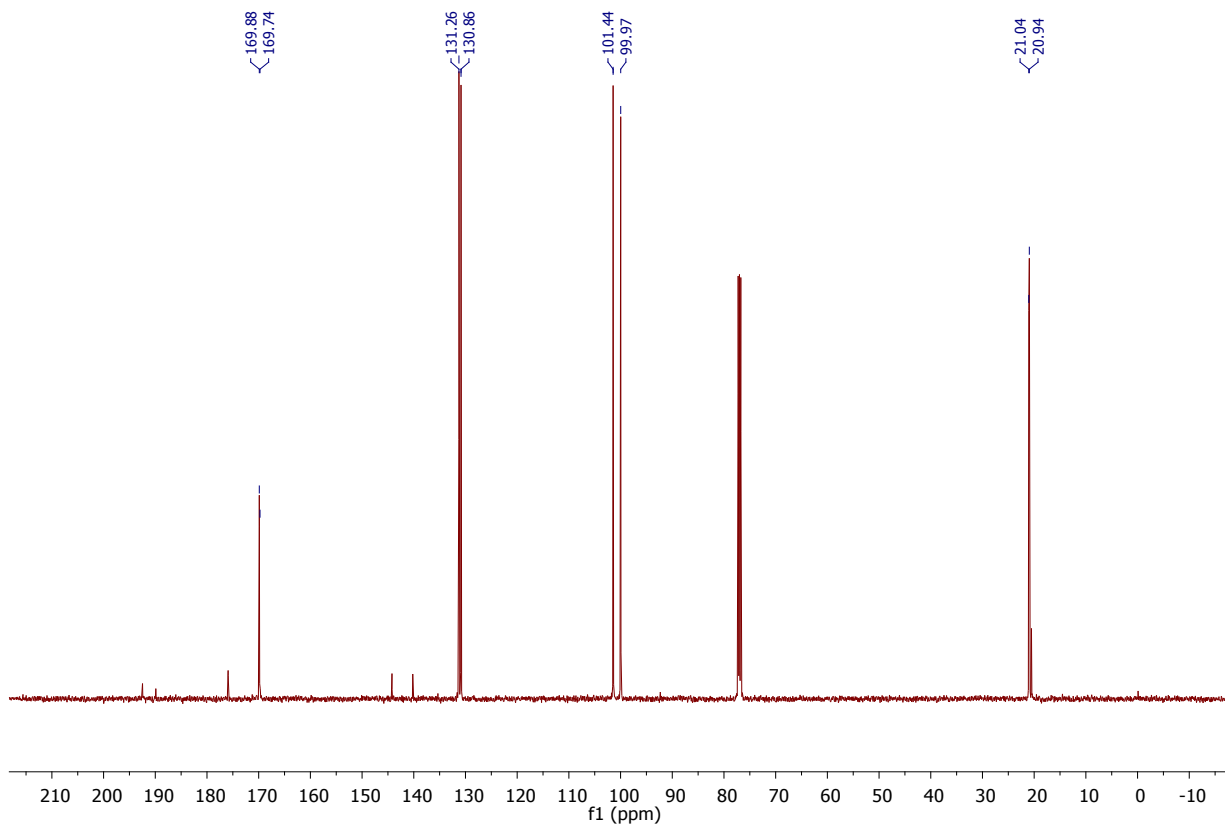

<sup>1</sup>H NMR Spectrum of compound **2y** in CDCl<sub>3</sub>

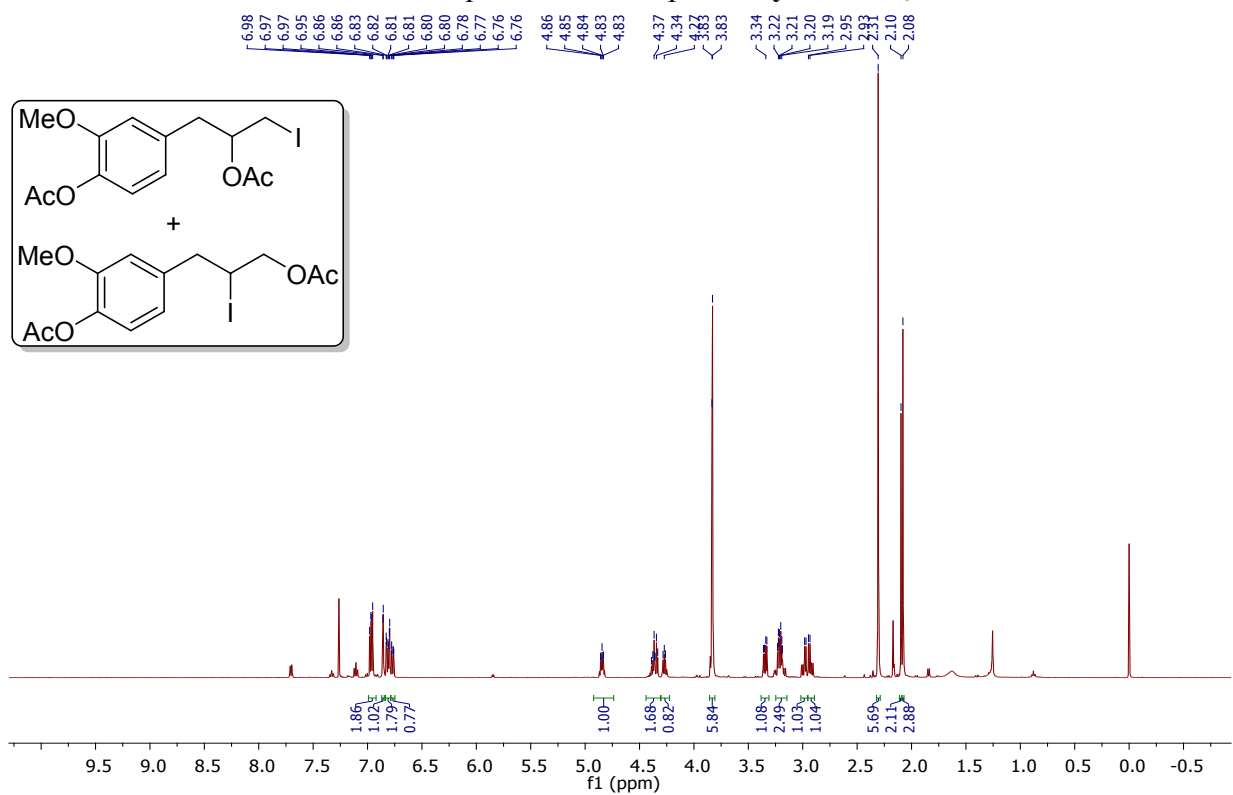

<sup>13</sup>C NMR Spectrum of compound **2y** in CDCl<sub>3</sub>

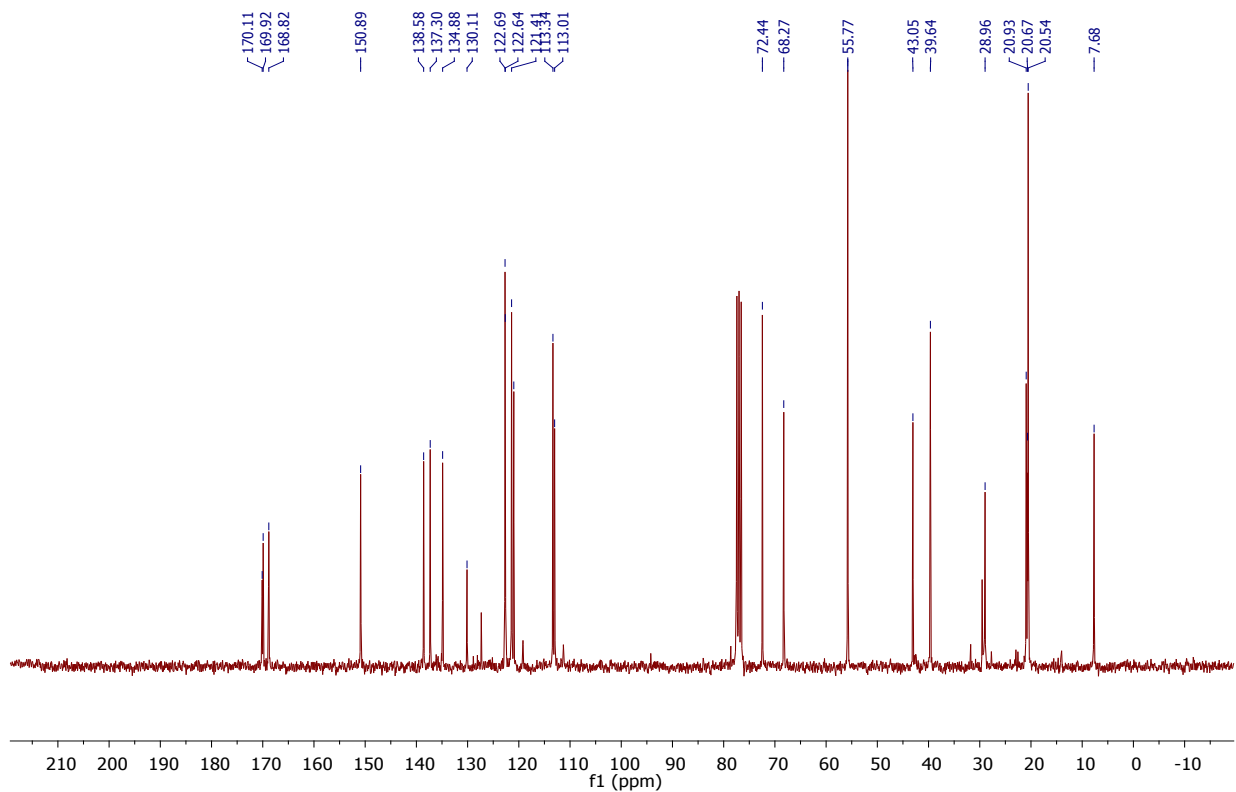

<sup>1</sup>H NMR Spectrum of compound **2z** in CDCl<sub>3</sub>

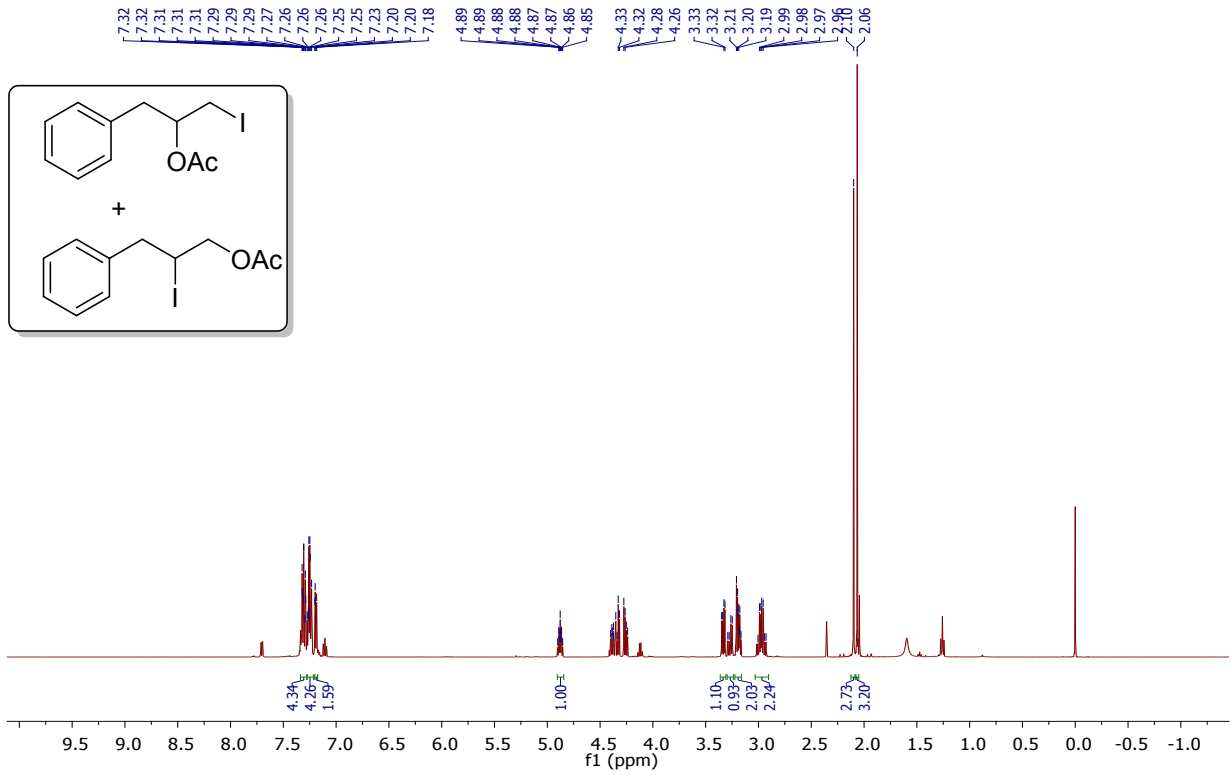

<sup>13</sup>C NMR Spectrum of compound **2z** in CDCl<sub>3</sub>

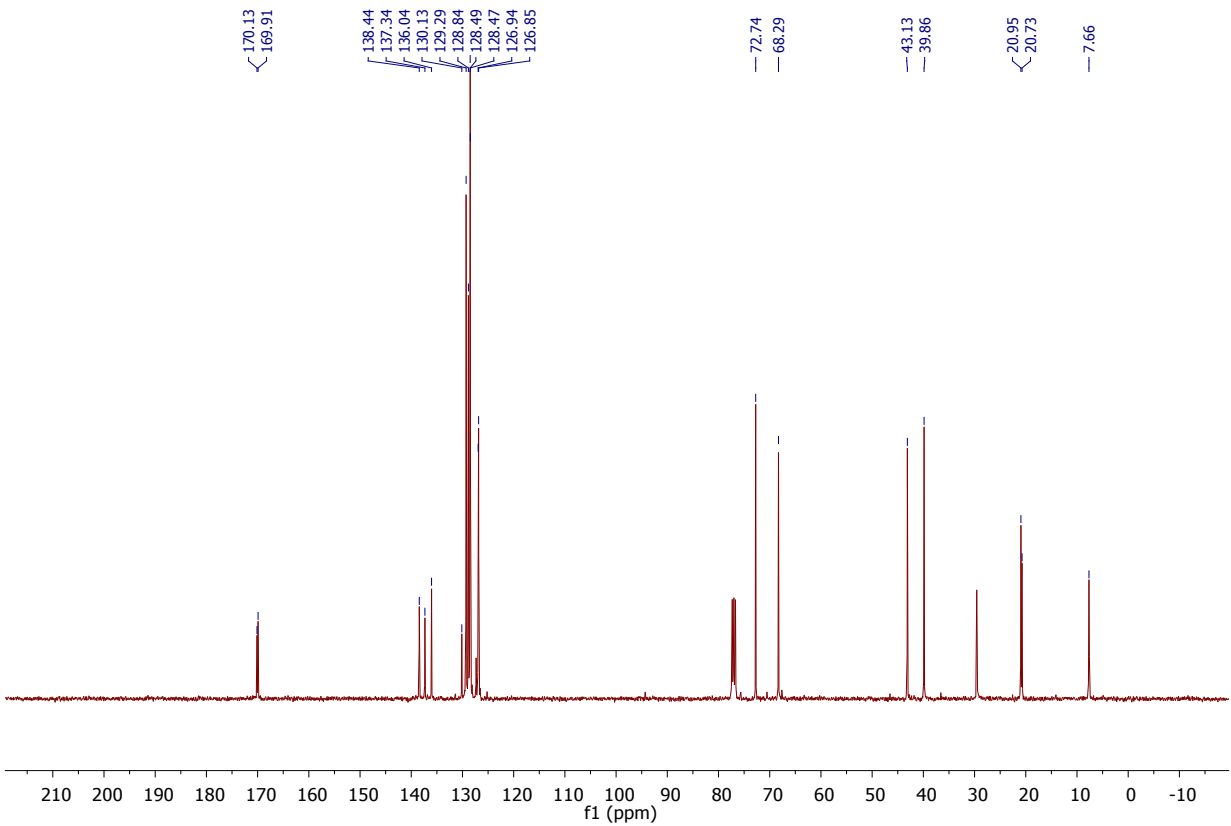



<sup>1</sup>H NMR Spectrum of compound **2aa** in CDCl<sub>3</sub>

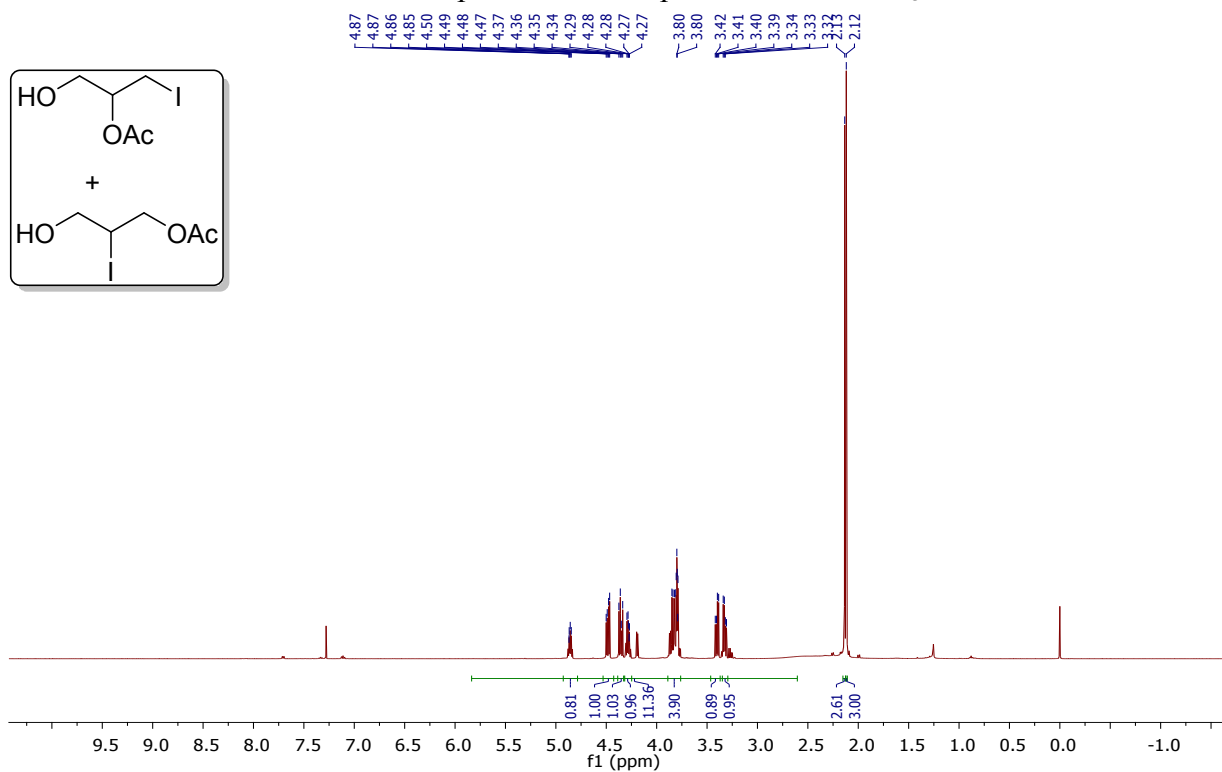

<sup>13</sup>C NMR Spectrum of compound **2aa** in CDCl<sub>3</sub>

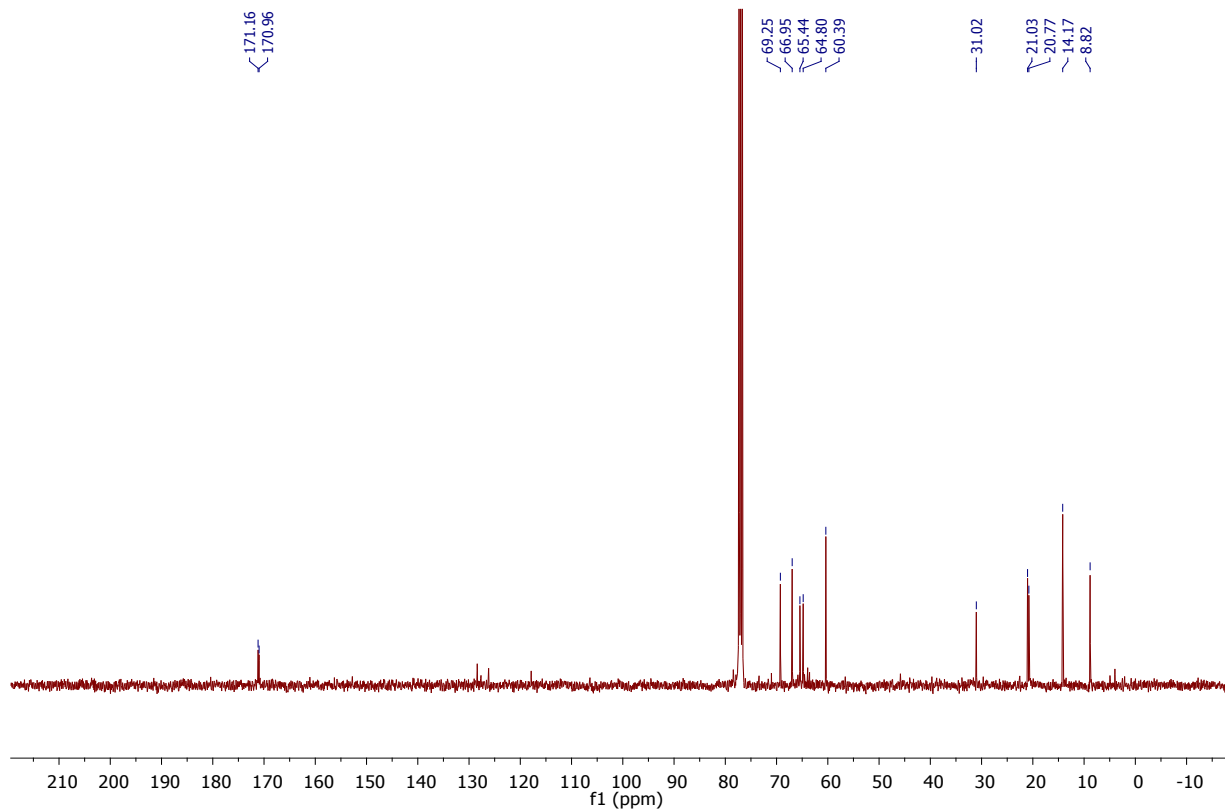

<sup>1</sup>H NMR Spectrum of compound **2ab** in CDCl<sub>3</sub>

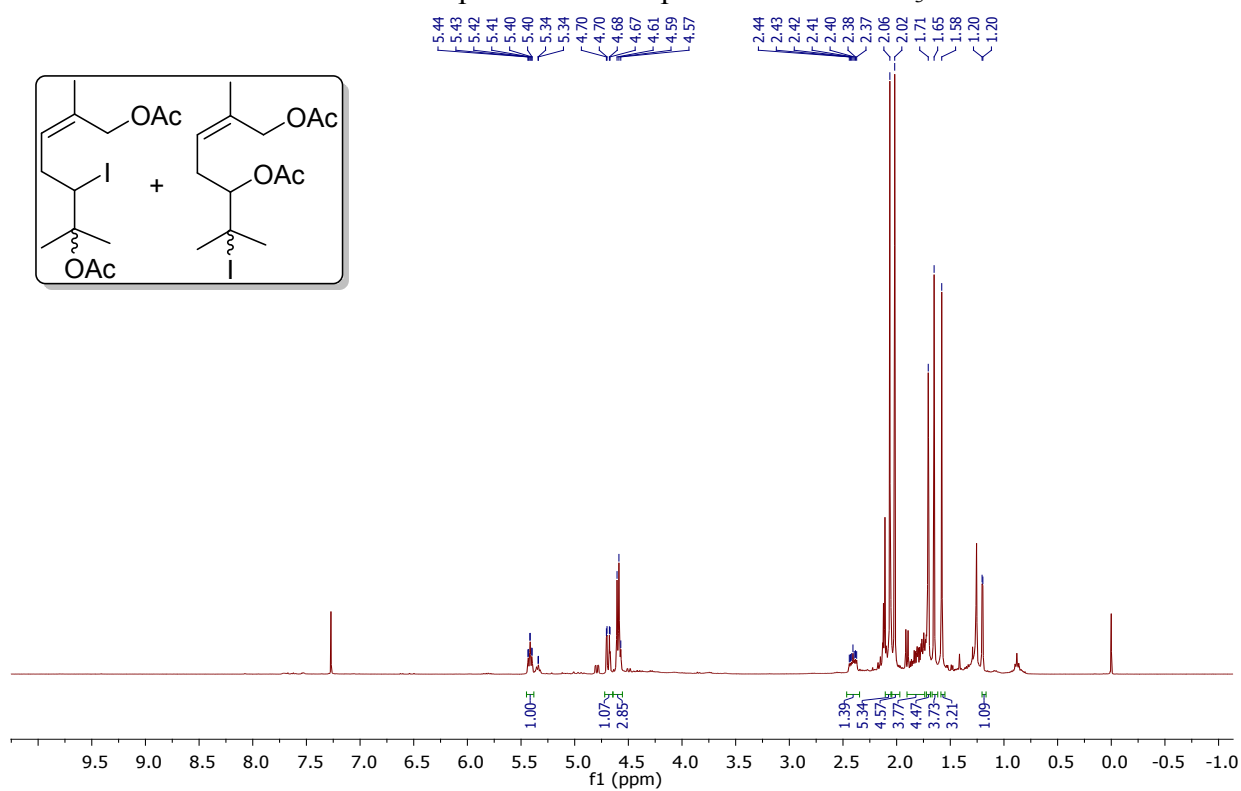

<sup>13</sup>C NMR Spectrum of compound **2ab** in CDCl<sub>3</sub>

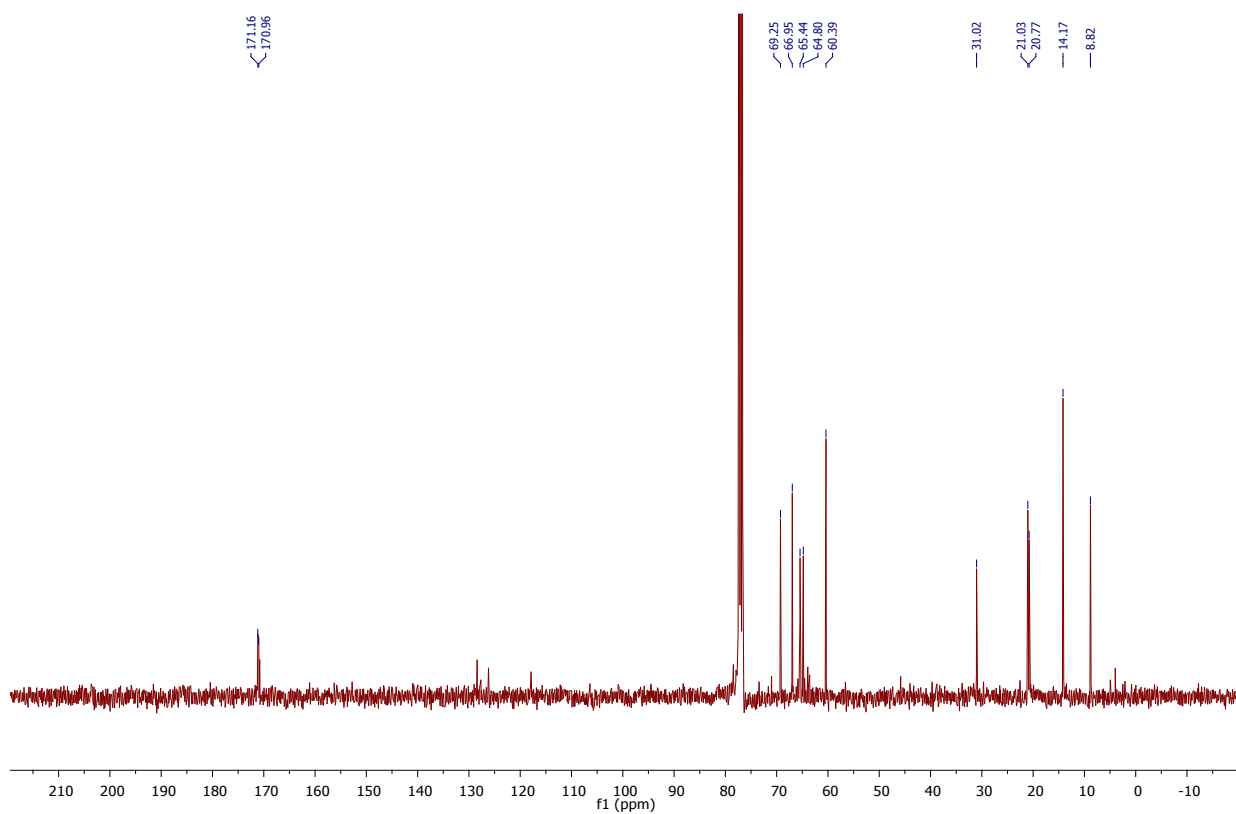

<sup>1</sup>H NMR Spectrum of compound **3a** in CDCl<sub>3</sub>

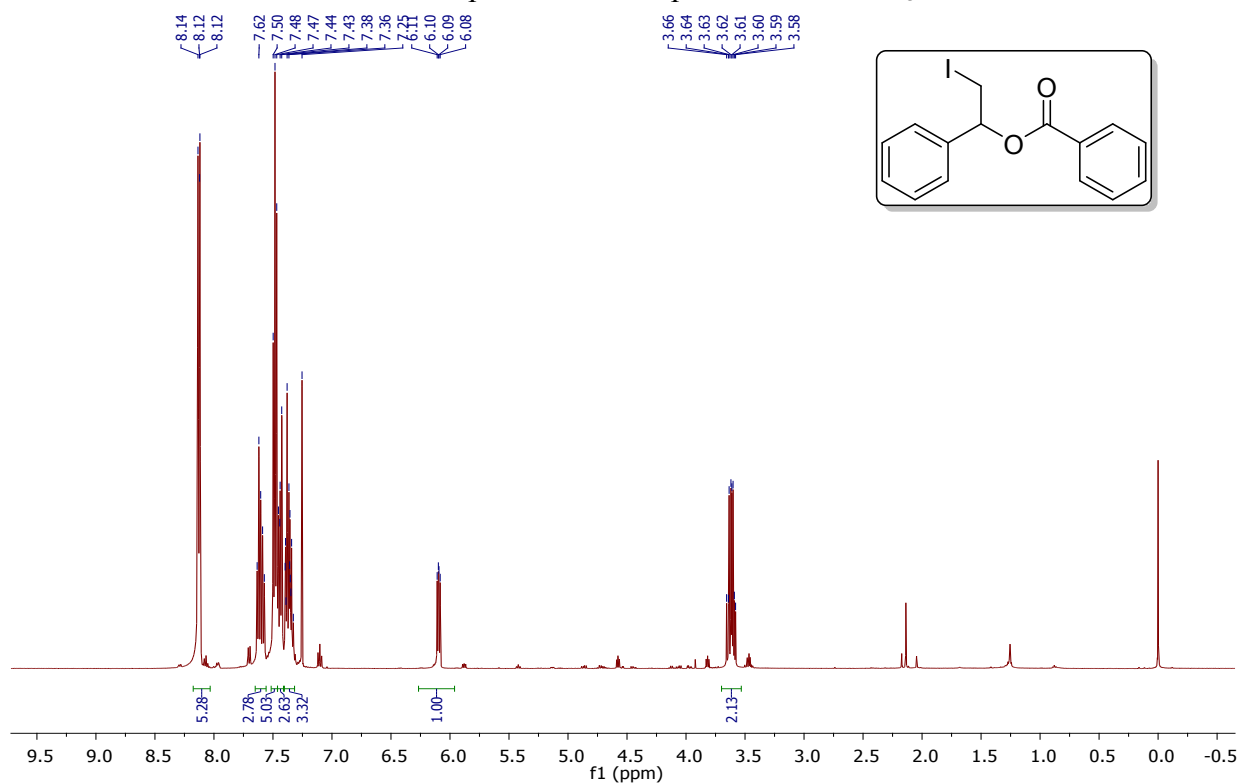

<sup>13</sup>C NMR Spectrum of compound **3a** in CDCl<sub>3</sub>

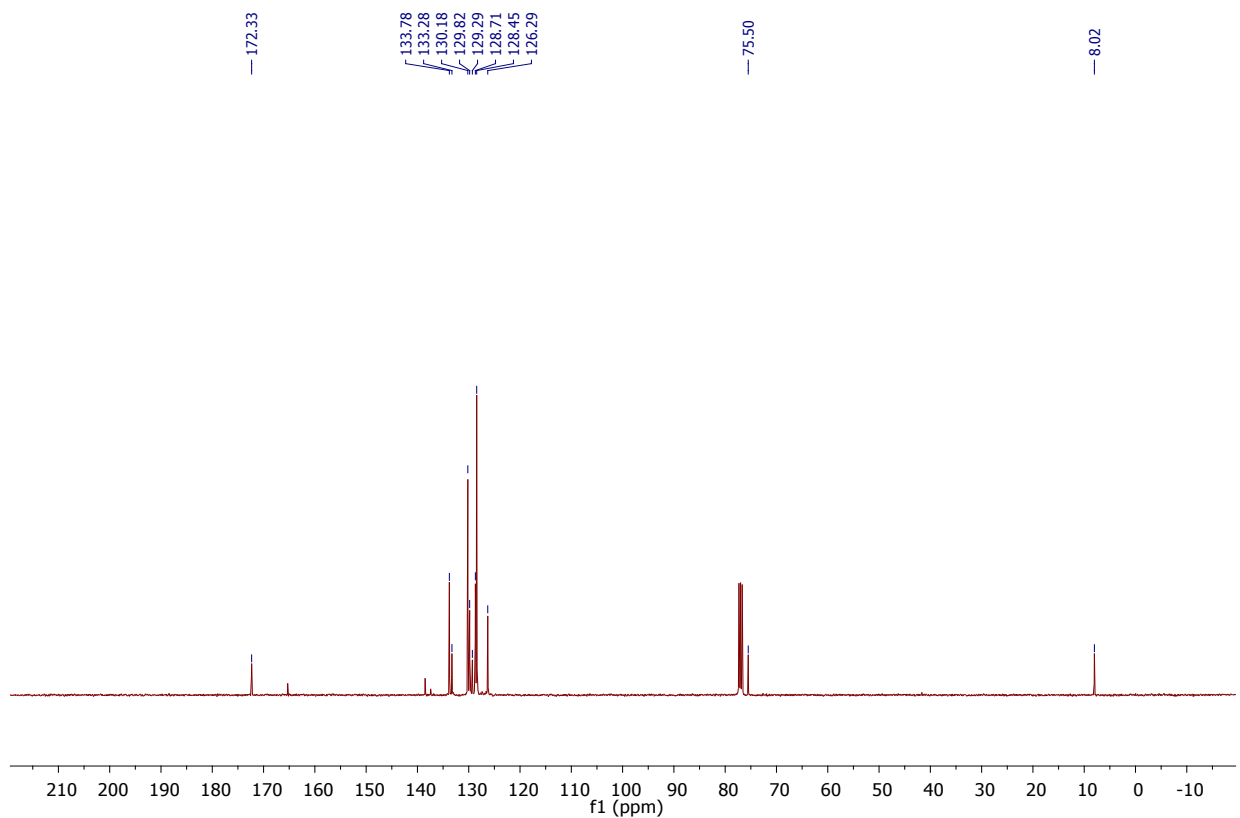

<sup>1</sup>H NMR Spectrum of compound **3b** in CDCl<sub>3</sub>

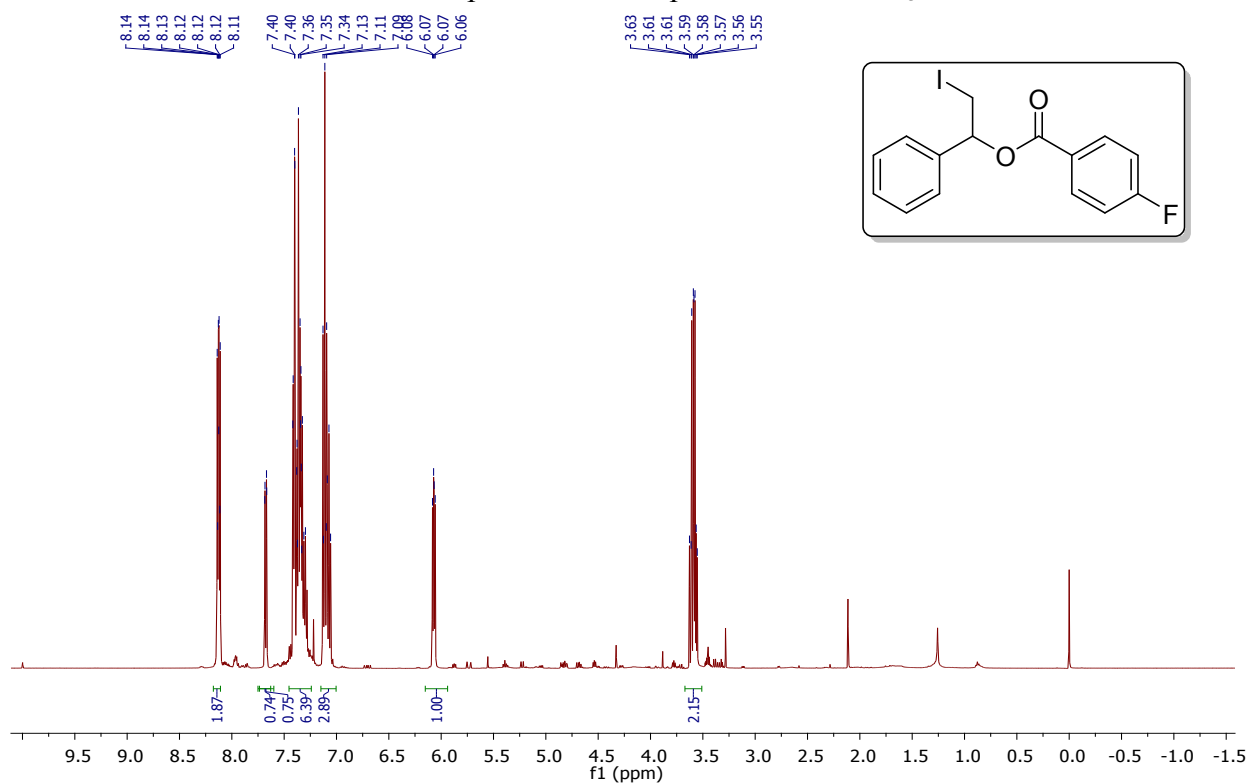

<sup>13</sup>C NMR Spectrum of compound **3b** in CDCl<sub>3</sub>

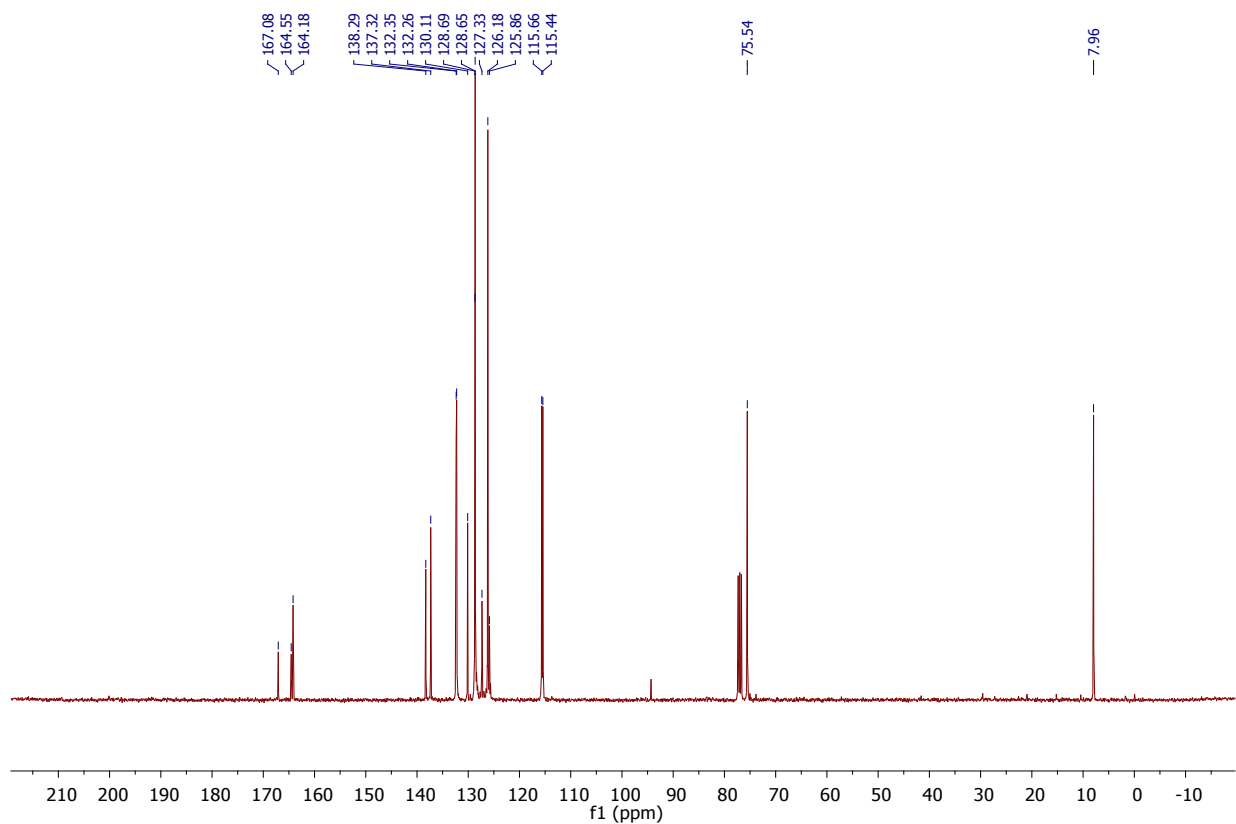

<sup>1</sup>H NMR Spectrum of compound **3c** in CDCl<sub>3</sub>

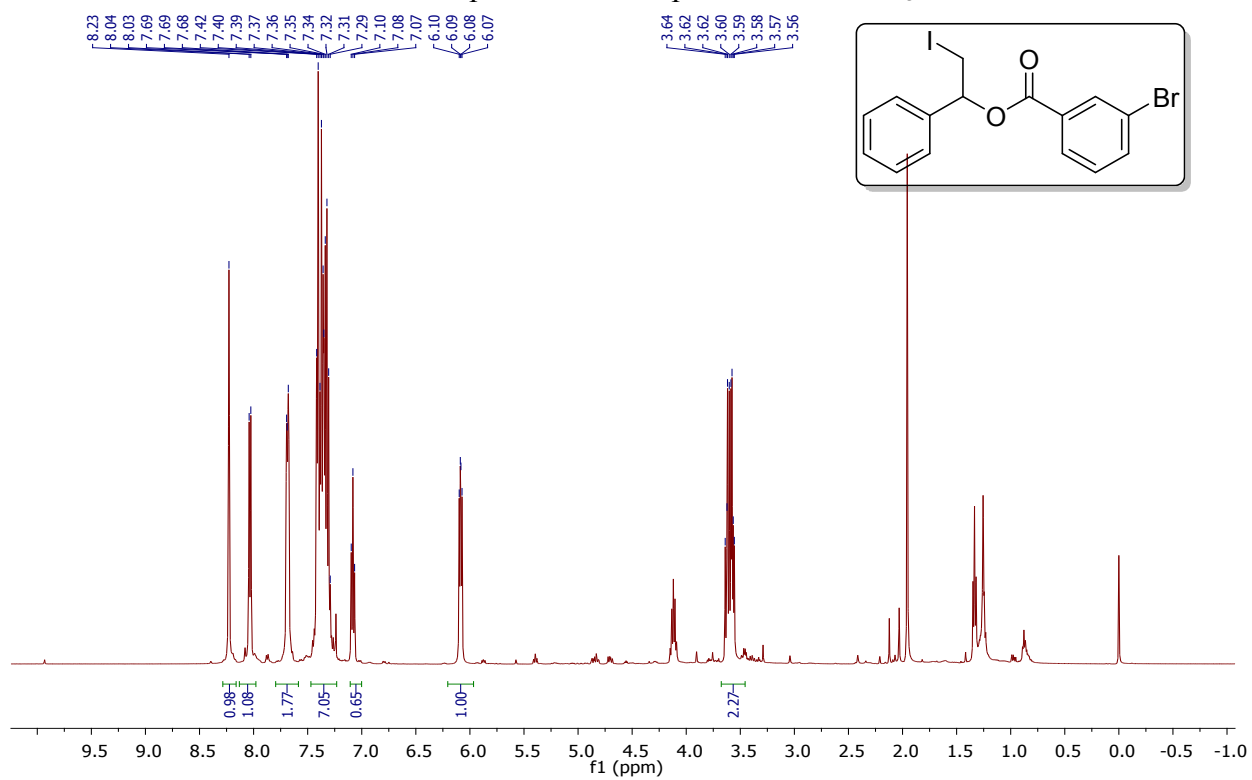

<sup>13</sup>C NMR Spectrum of compound **3c** in CDCl<sub>3</sub>

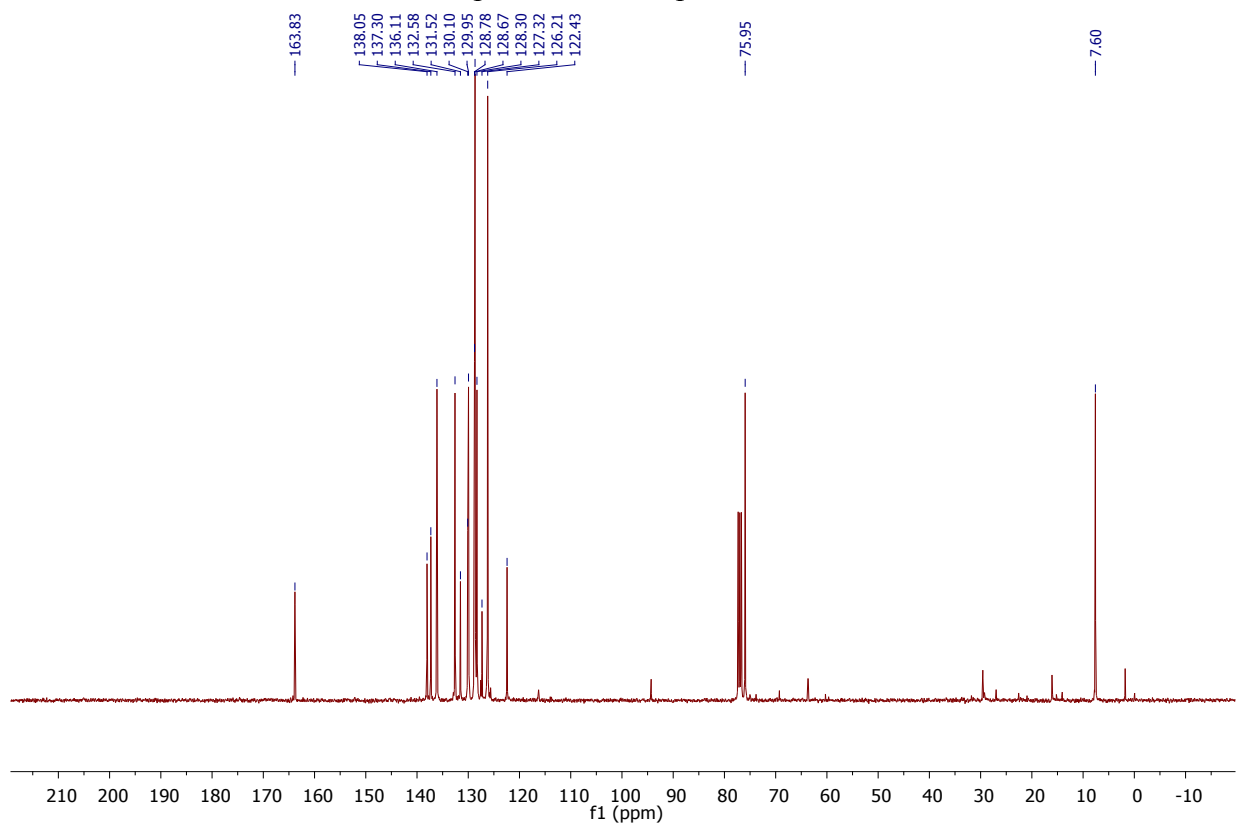

<sup>1</sup>H NMR Spectrum of compound **3d** in CDCl<sub>3</sub>

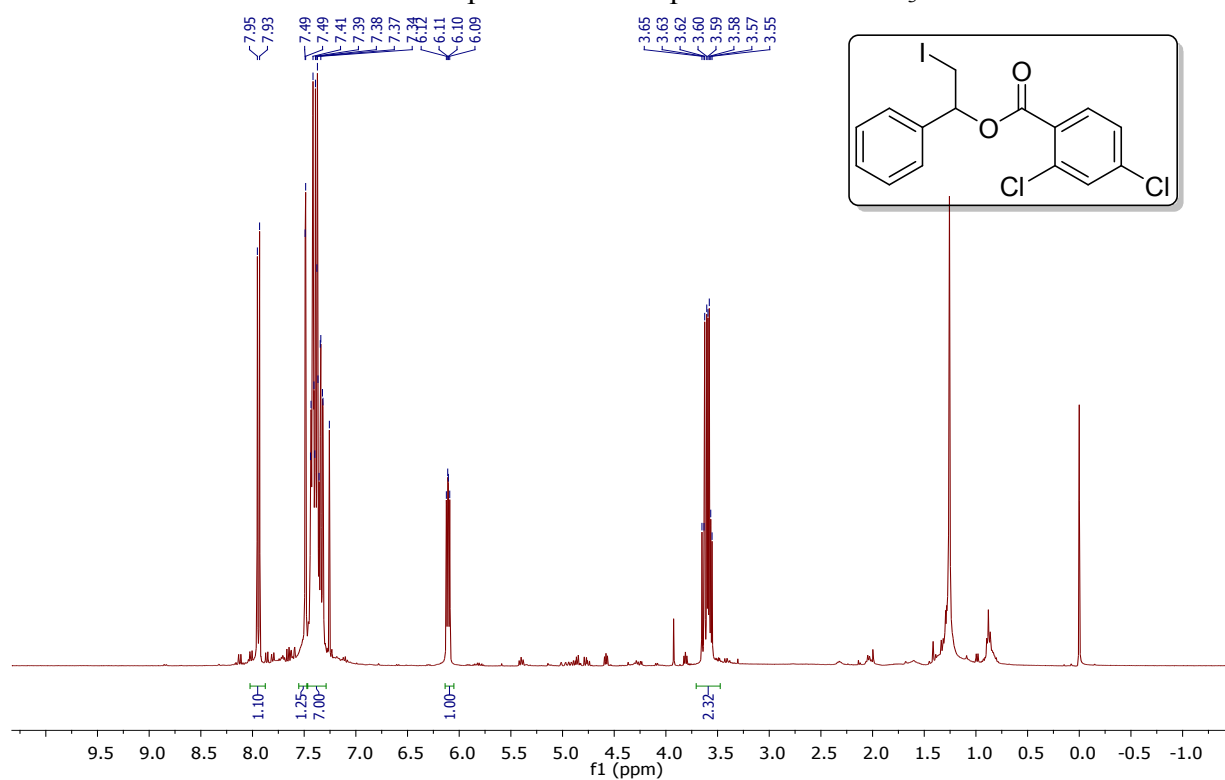

<sup>13</sup>C NMR Spectrum of compound **3d** in CDCl<sub>3</sub>

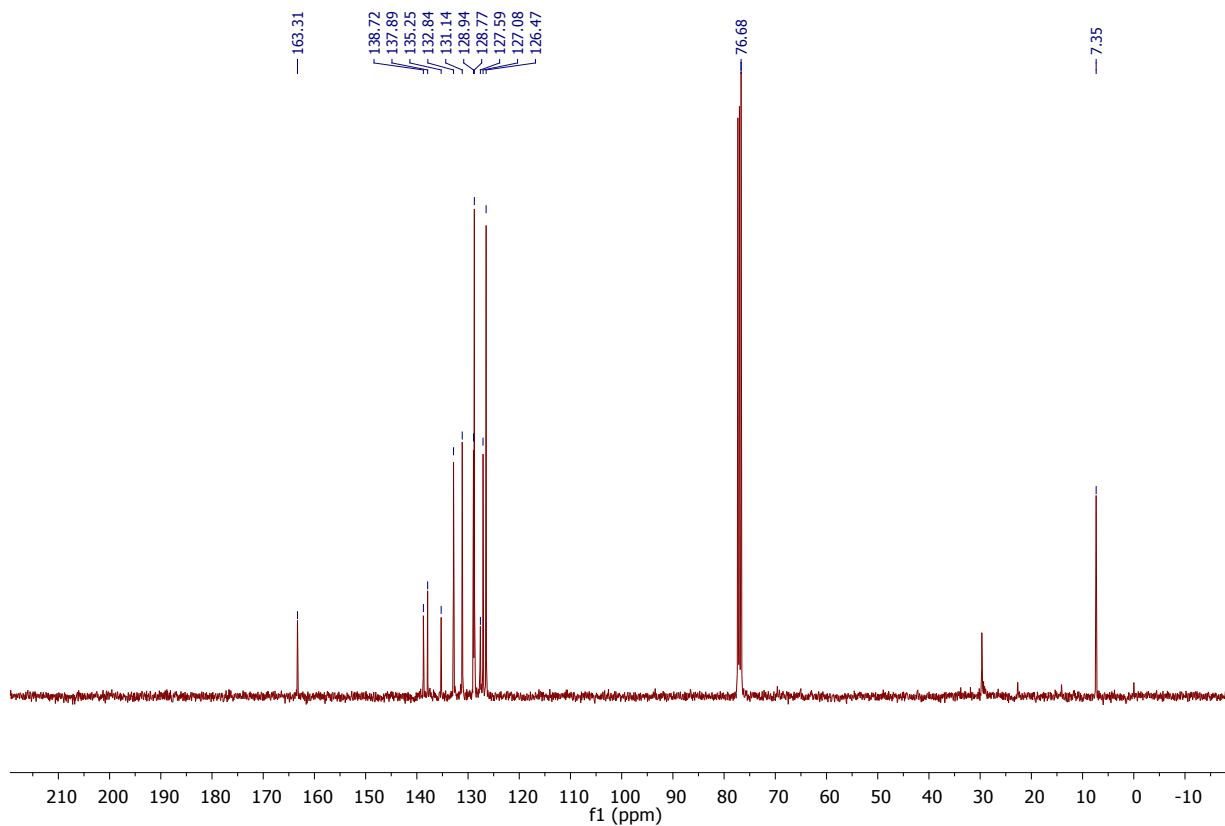

<sup>1</sup>H NMR Spectrum of compound **3e** in CDCl<sub>3</sub>

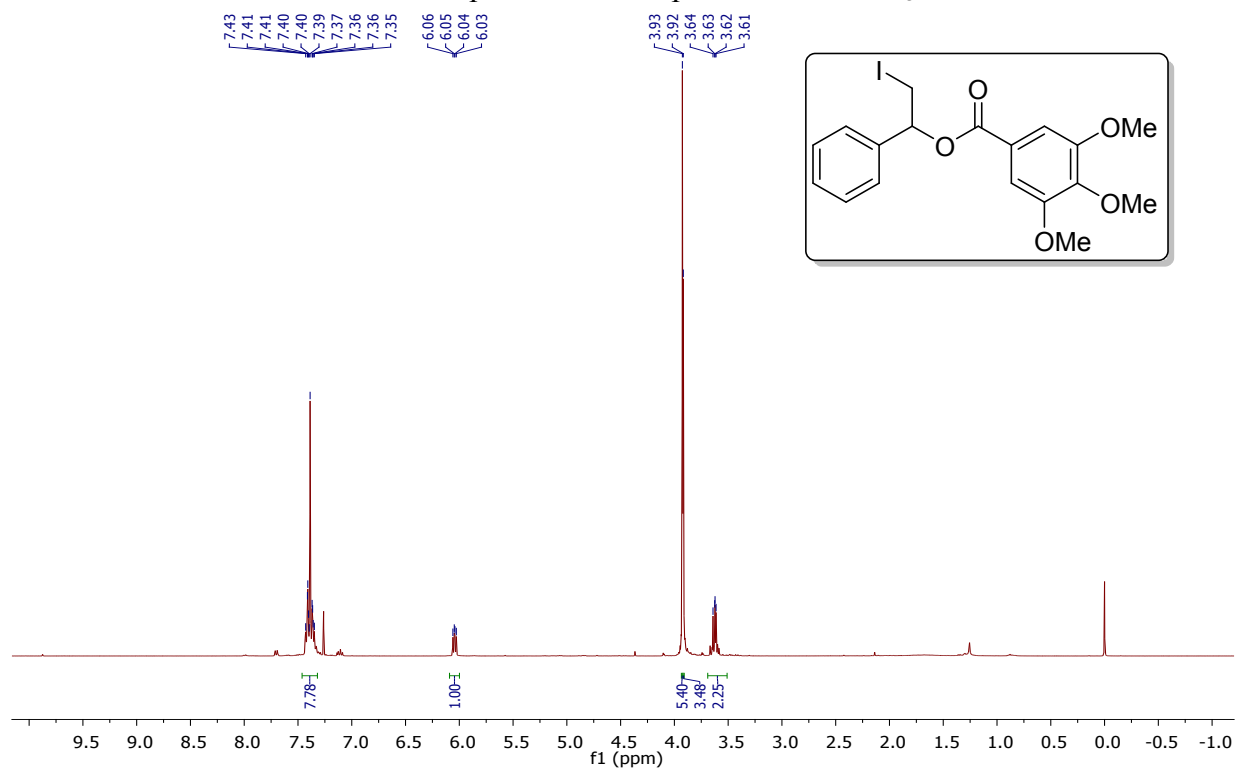

<sup>13</sup>C NMR Spectrum of compound **3e** in CDCl<sub>3</sub>

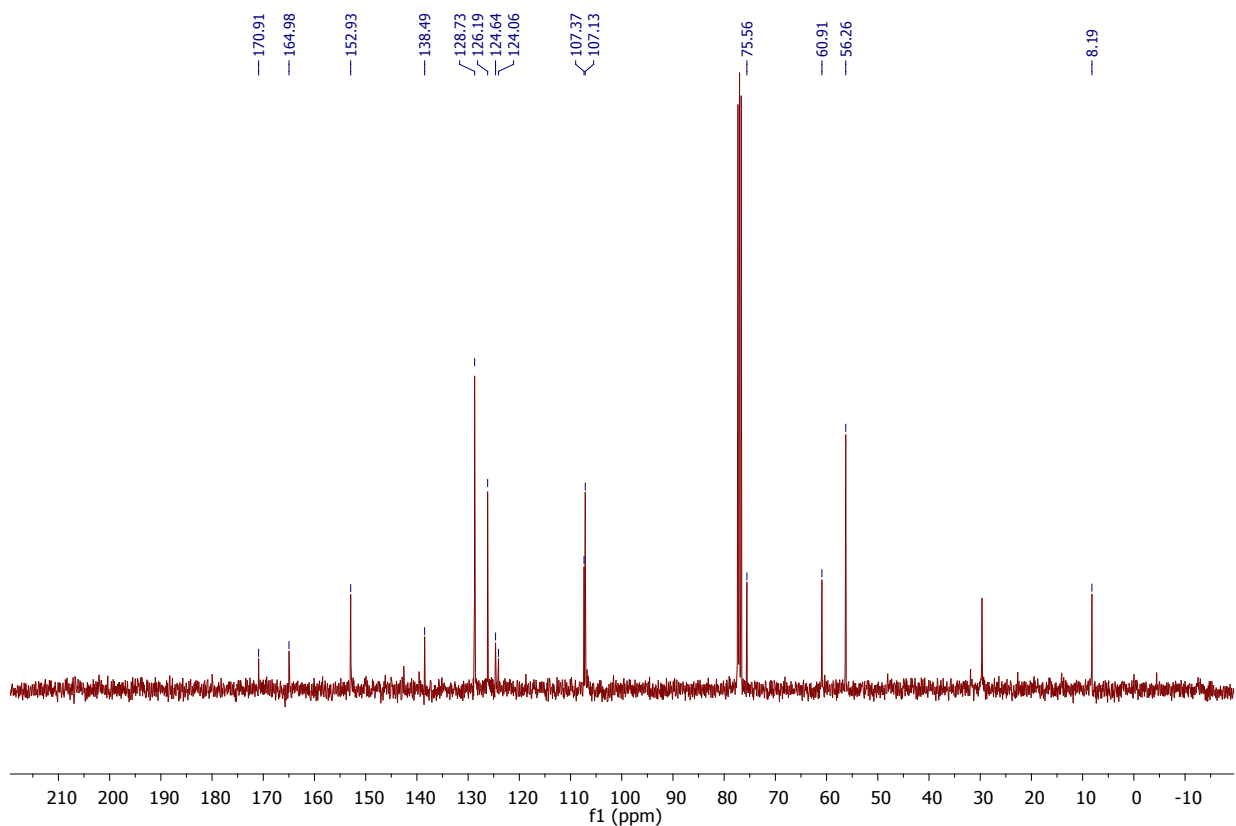

<sup>1</sup>H NMR Spectrum of compound **3f** in CDCl<sub>3</sub>

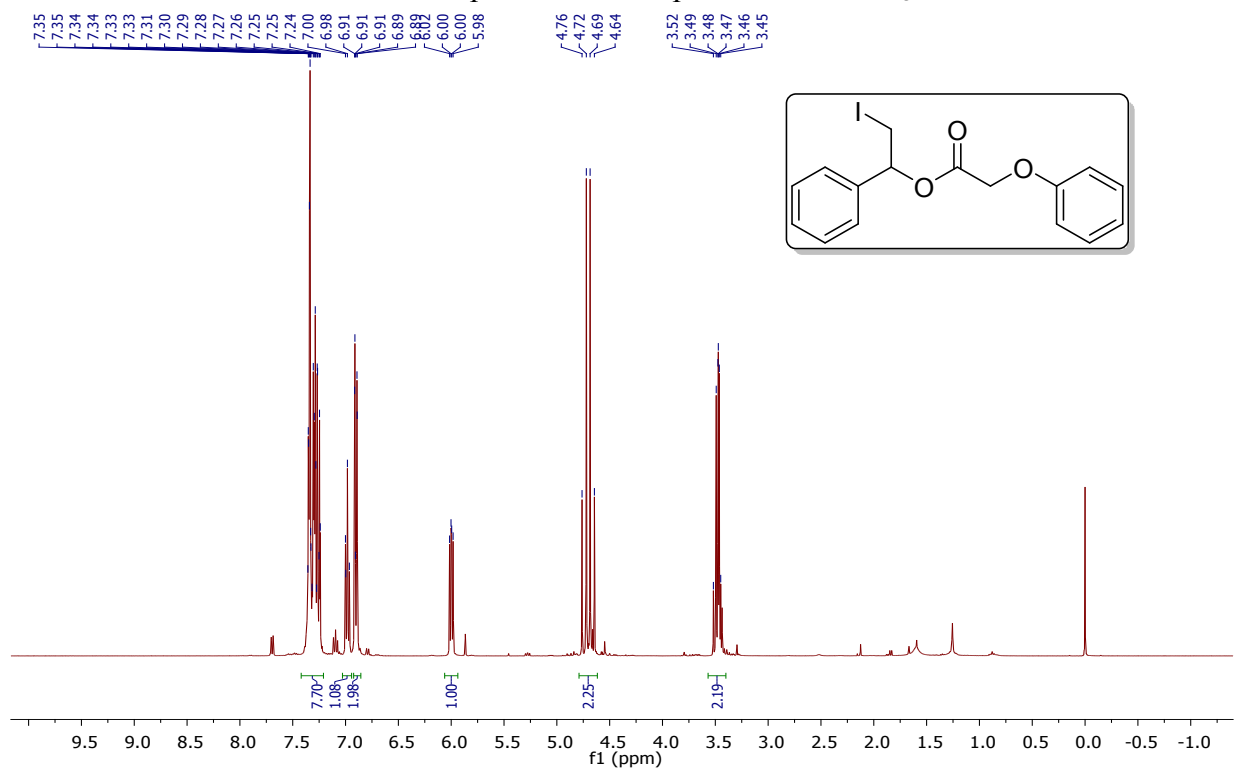

<sup>13</sup>C NMR Spectrum of compound **3f** in CDCl<sub>3</sub>

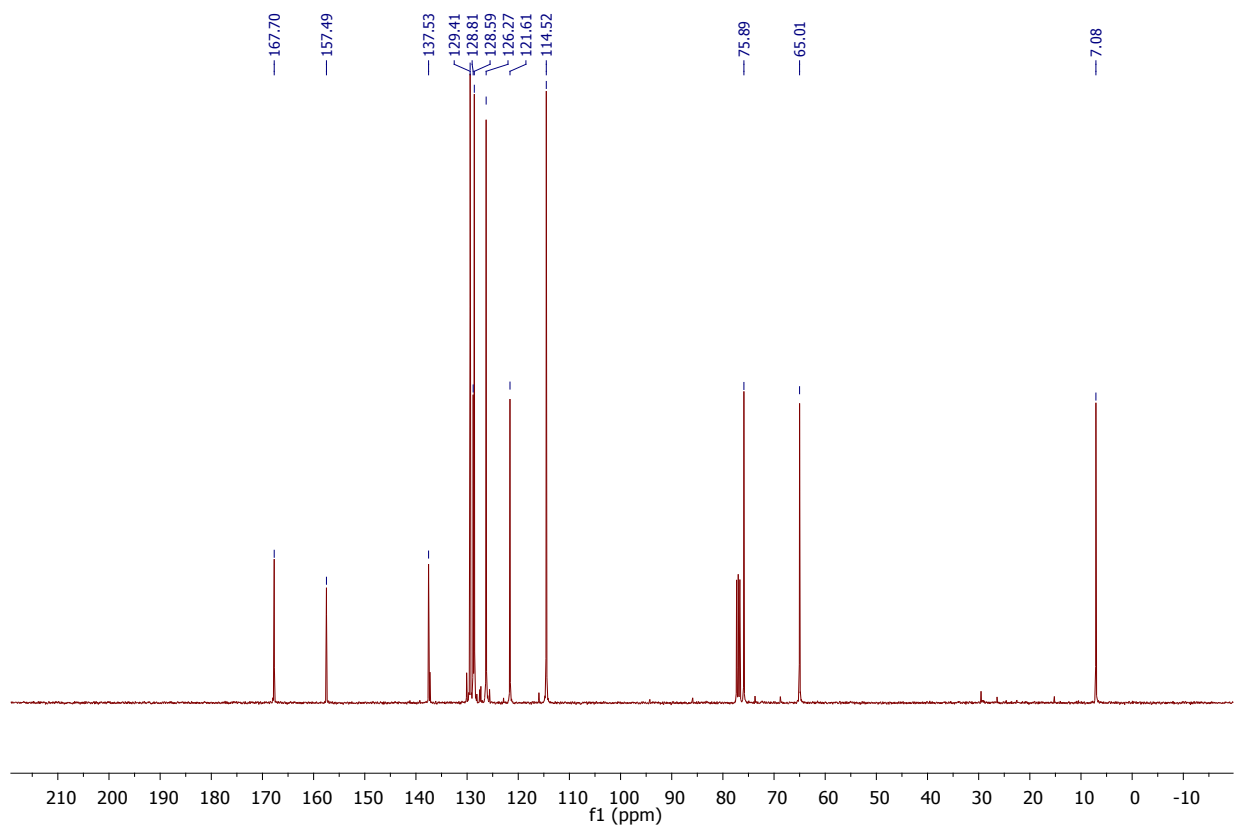



<sup>1</sup>H NMR Spectrum of compound **3g** in CDCl<sub>3</sub>

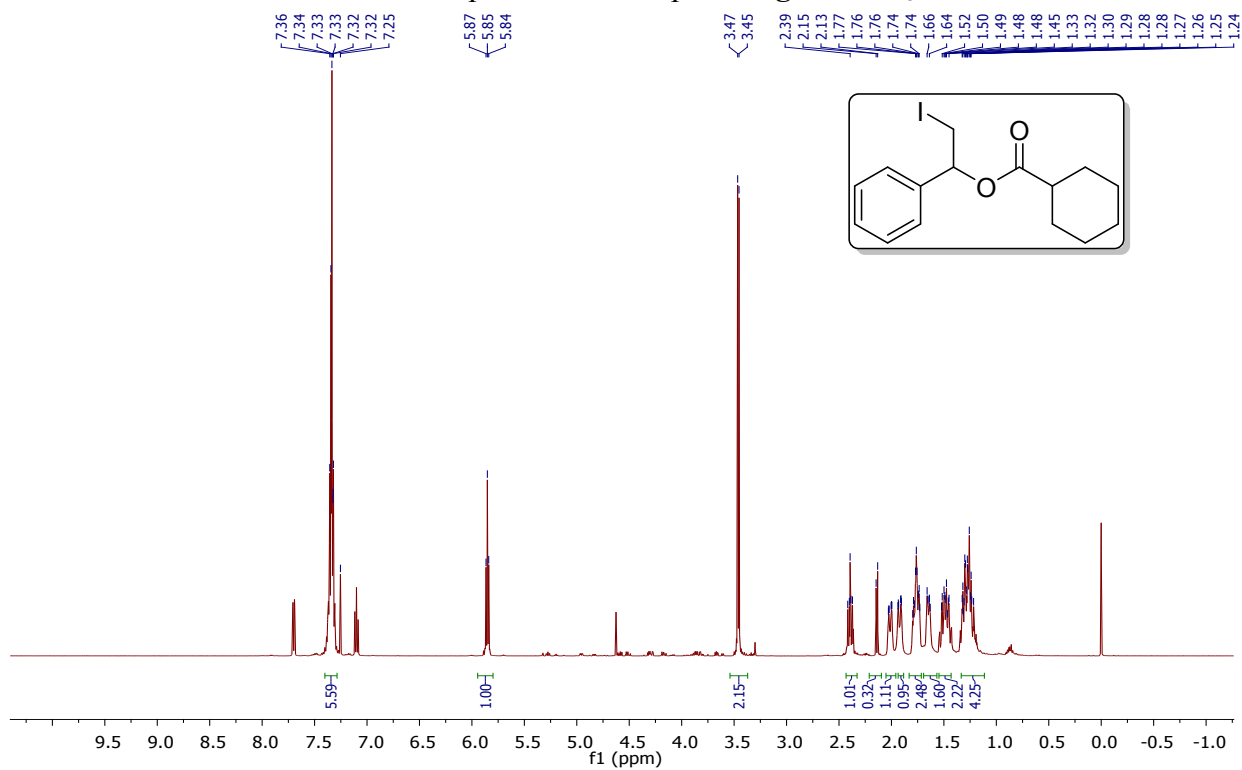

<sup>13</sup>C NMR Spectrum of compound **3g** in CDCl<sub>3</sub>

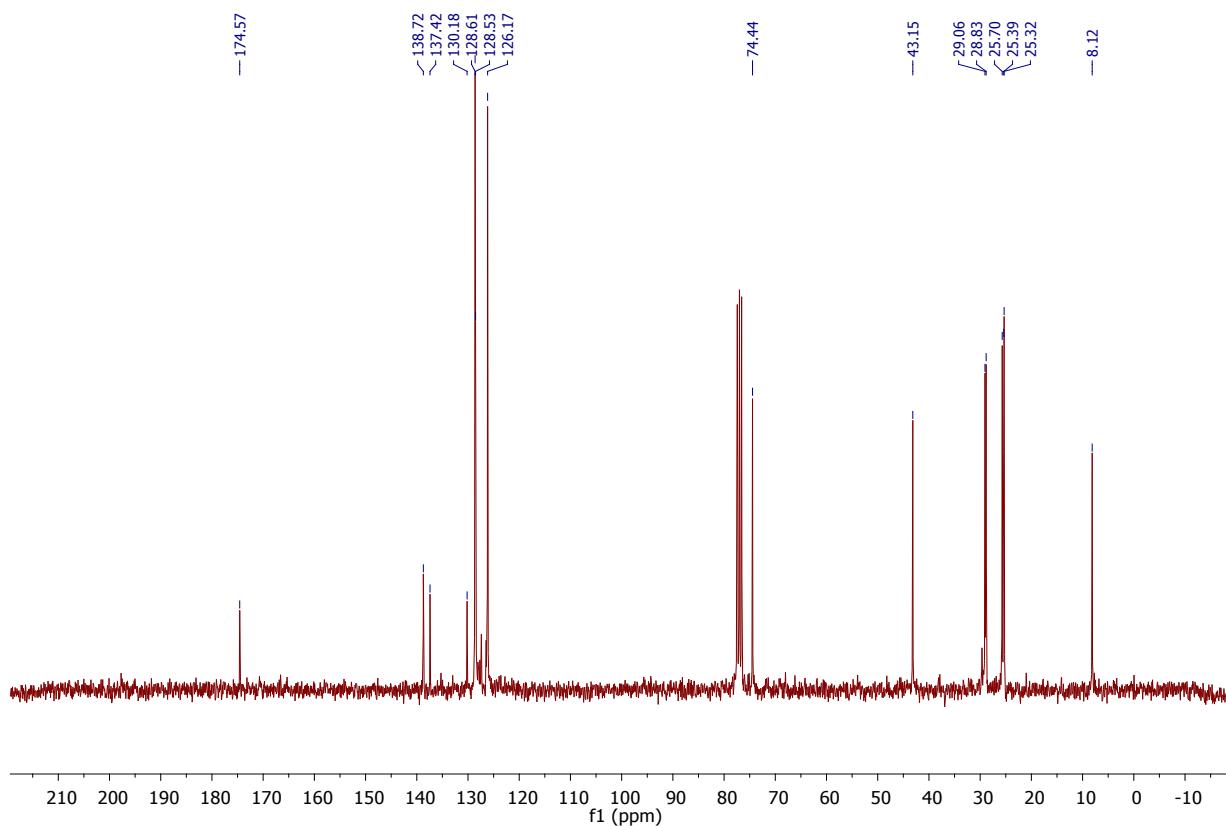

<sup>1</sup>H NMR Spectrum of compound **3h** in CDCl<sub>3</sub>

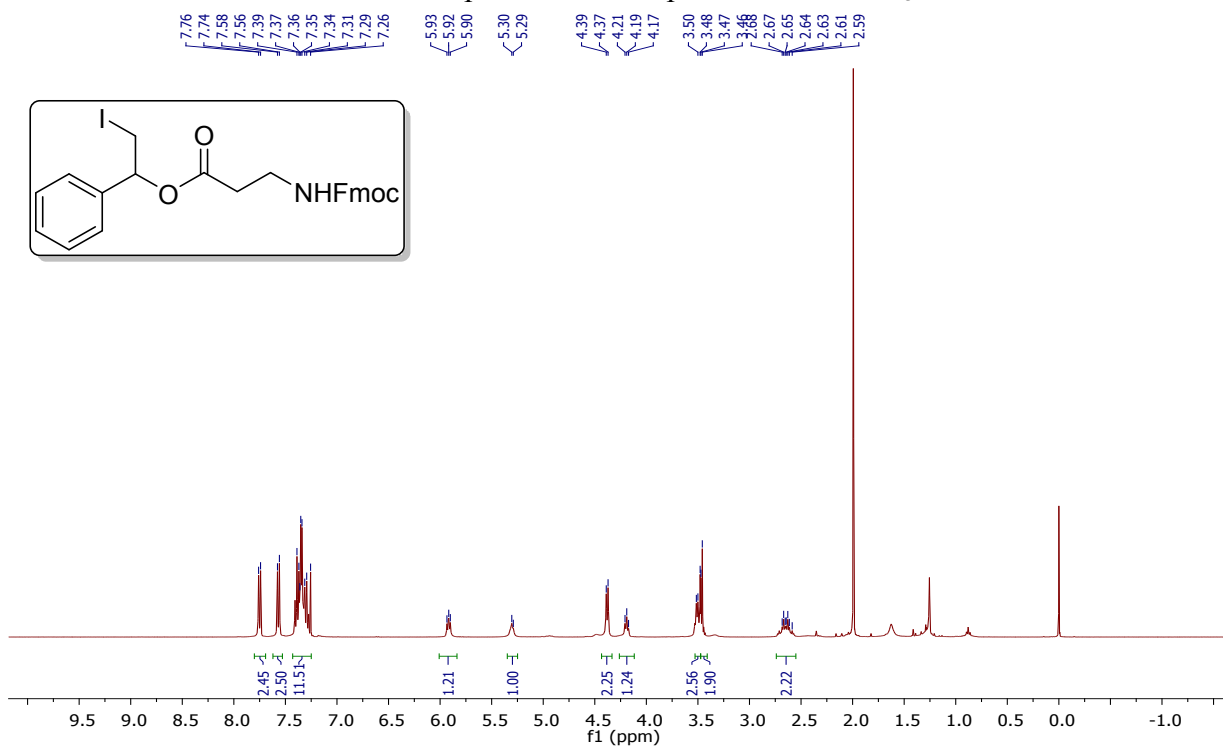

<sup>13</sup>C NMR Spectrum of compound **3h** in CDCl<sub>3</sub>

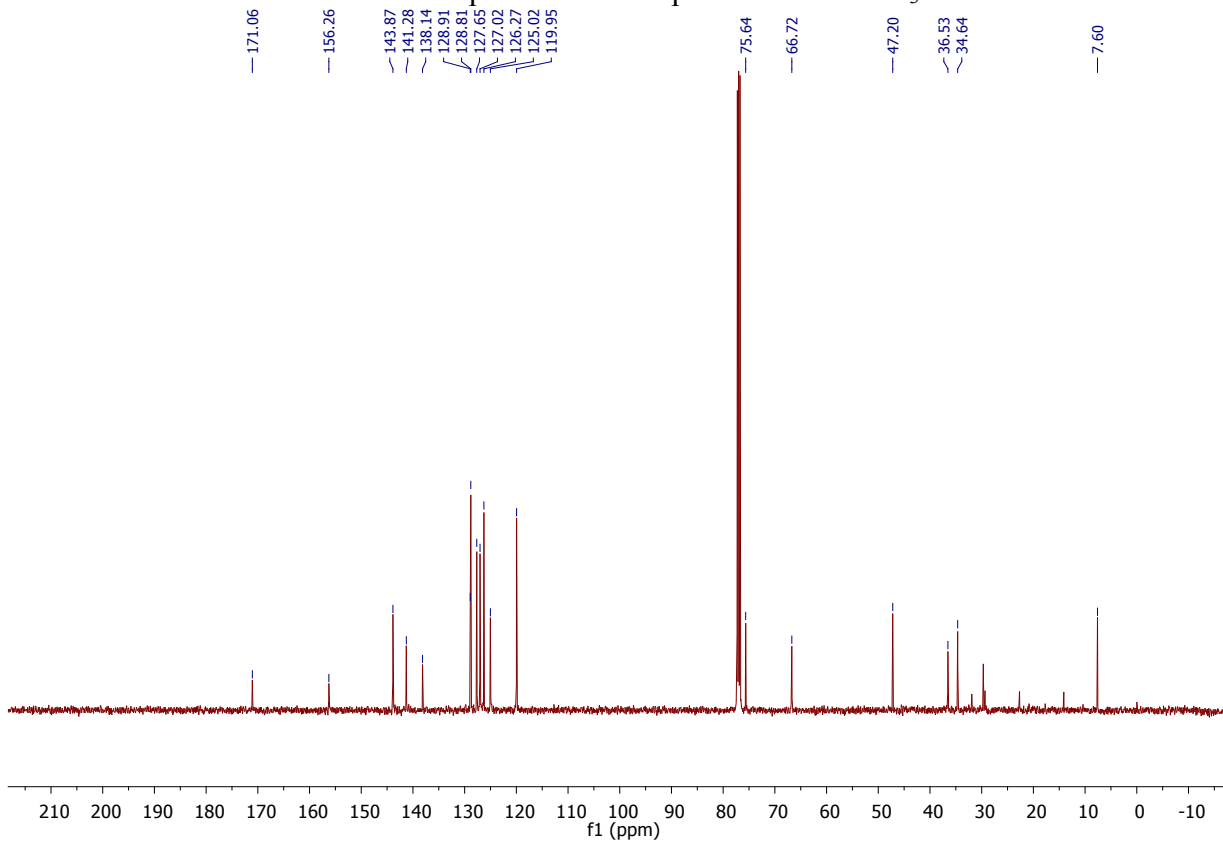

<sup>1</sup>H NMR Spectrum of compound **4a** in CDCl<sub>3</sub>

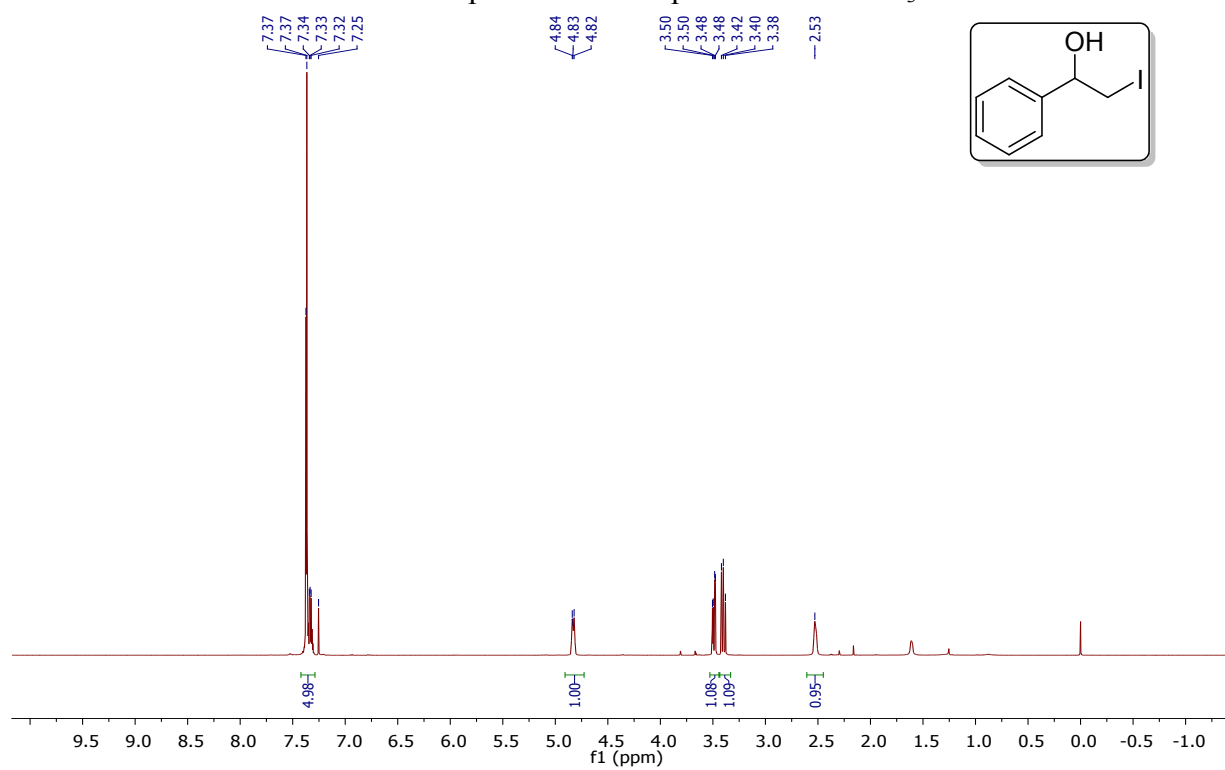

<sup>13</sup>C NMR Spectrum of compound **4a** in CDCl<sub>3</sub>

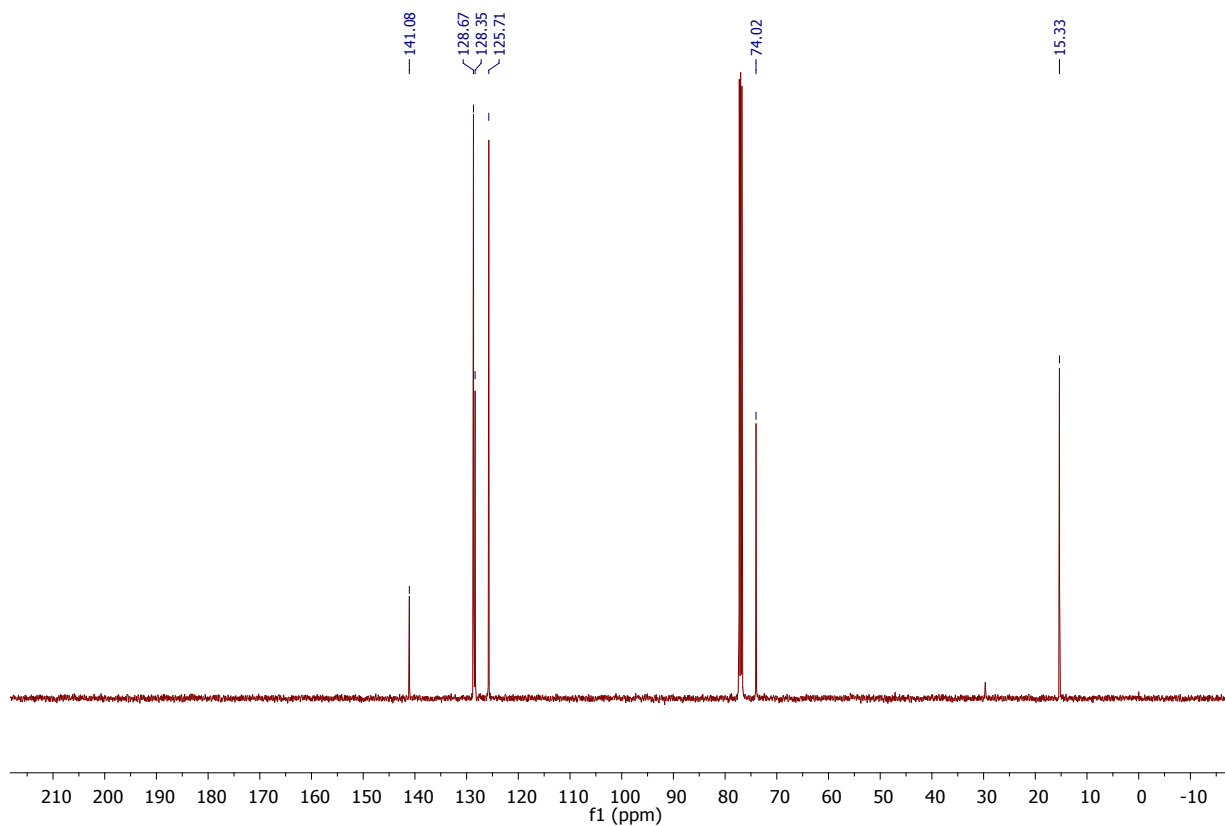

<sup>1</sup>H NMR Spectrum of compound **4b** in CDCl<sub>3</sub>

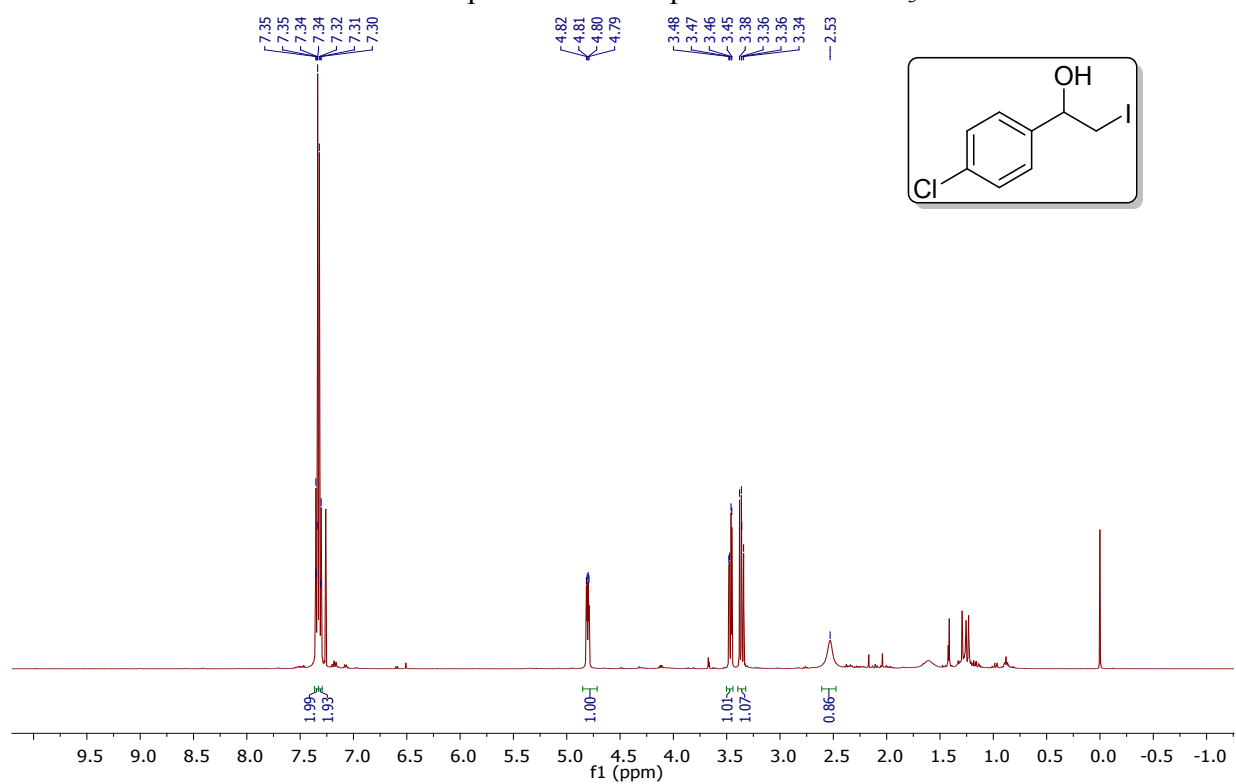

<sup>13</sup>C NMR Spectrum of compound **4b** in CDCl<sub>3</sub>

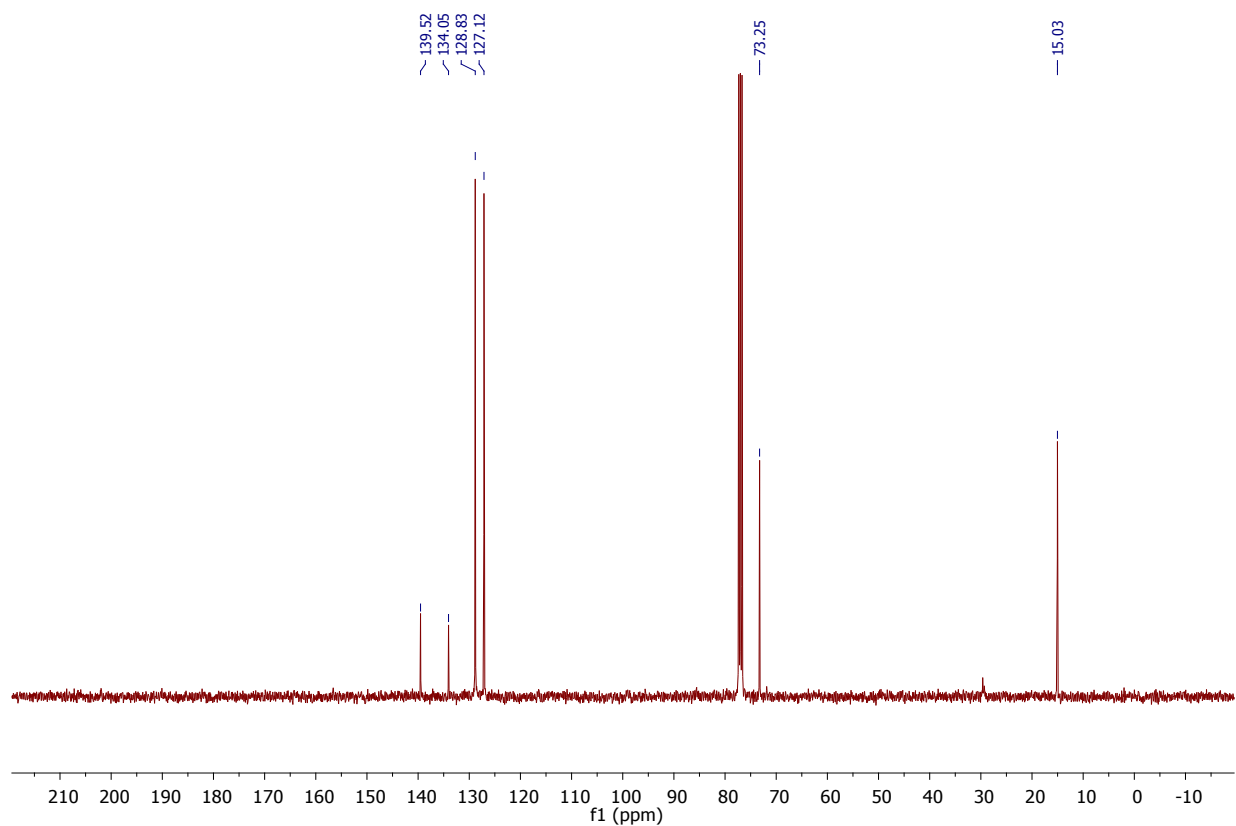

<sup>1</sup>H NMR Spectrum of compound **4c** in CDCl<sub>3</sub>

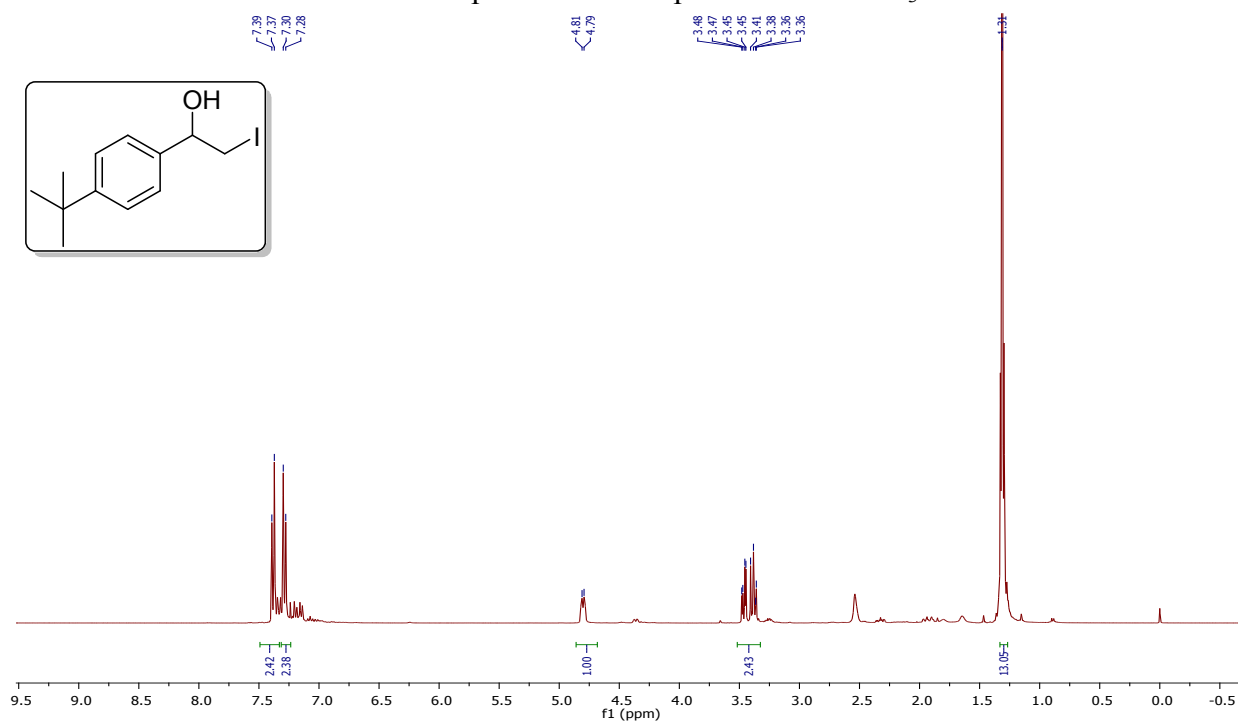

<sup>13</sup>C NMR Spectrum of compound **4c** in CDCl<sub>3</sub>

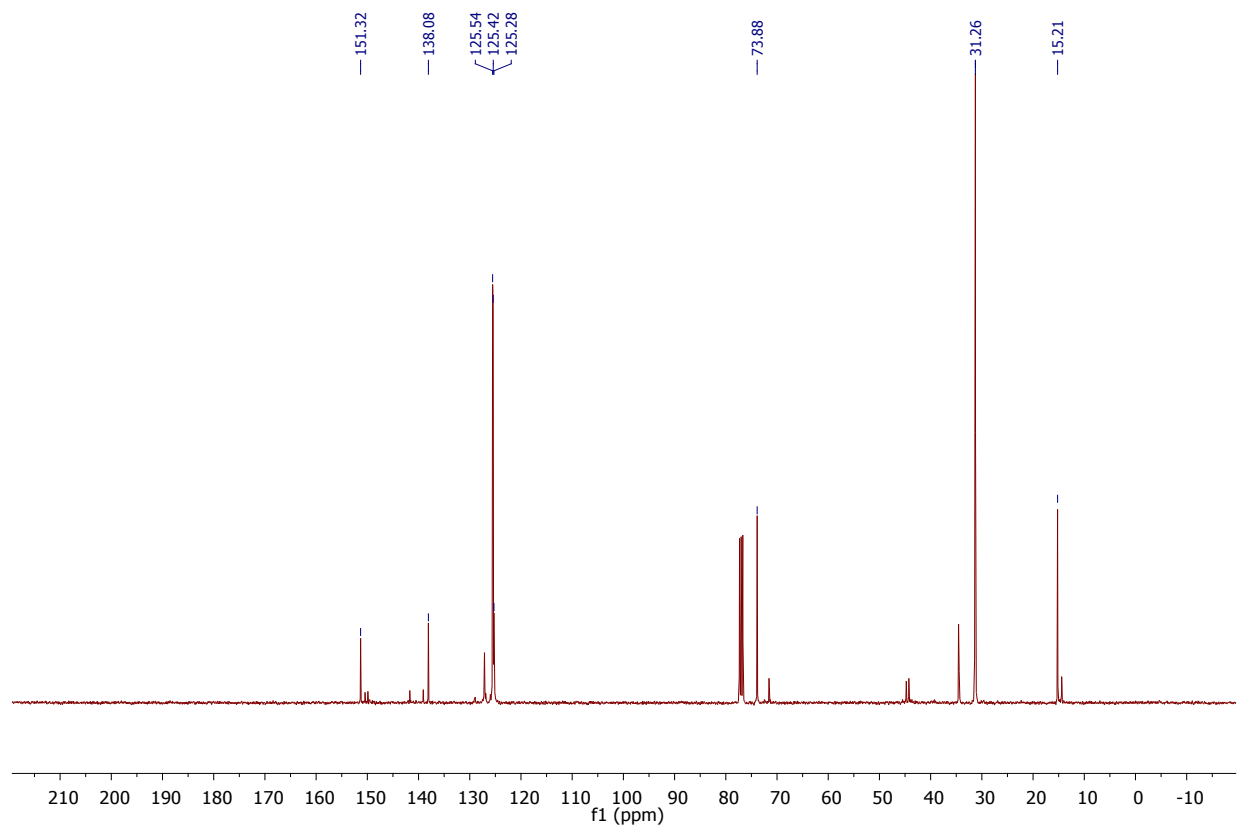

<sup>1</sup>H NMR Spectrum of compound **4d** in CDCl<sub>3</sub>

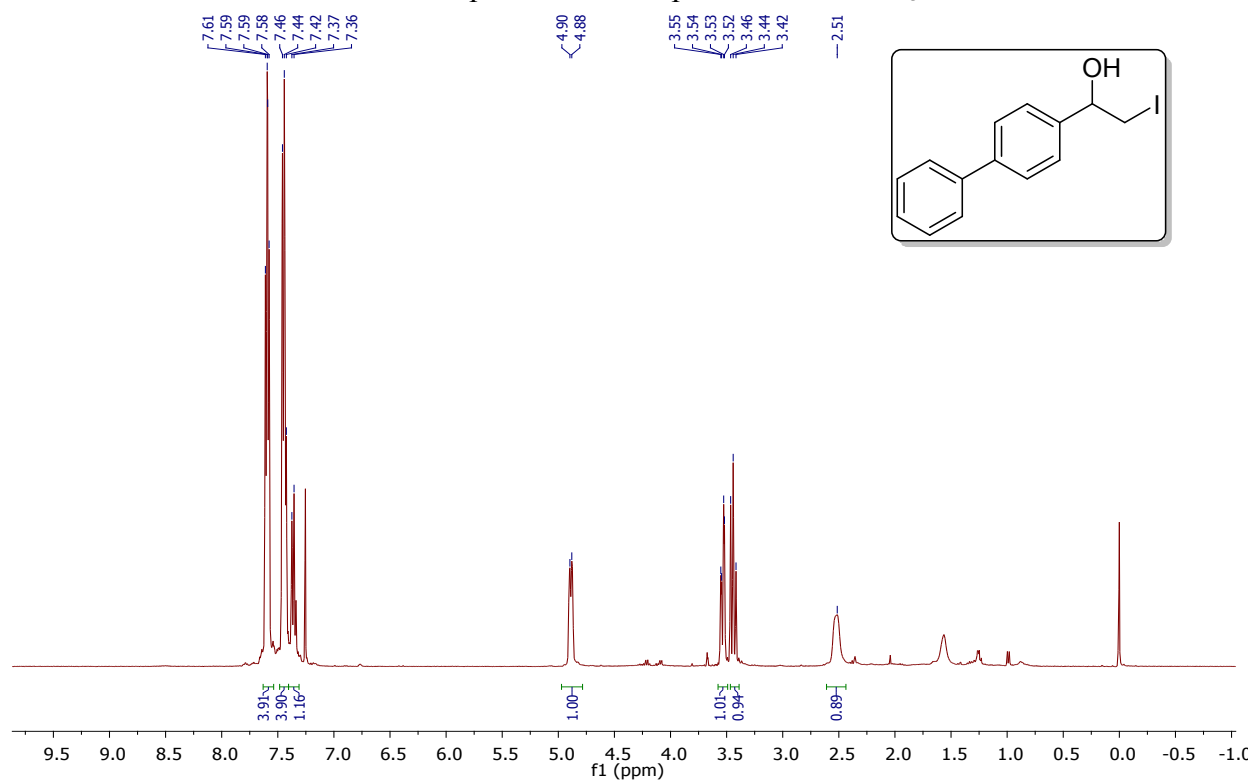

<sup>13</sup>C NMR Spectrum of compound **4d** in CDCl<sub>3</sub>

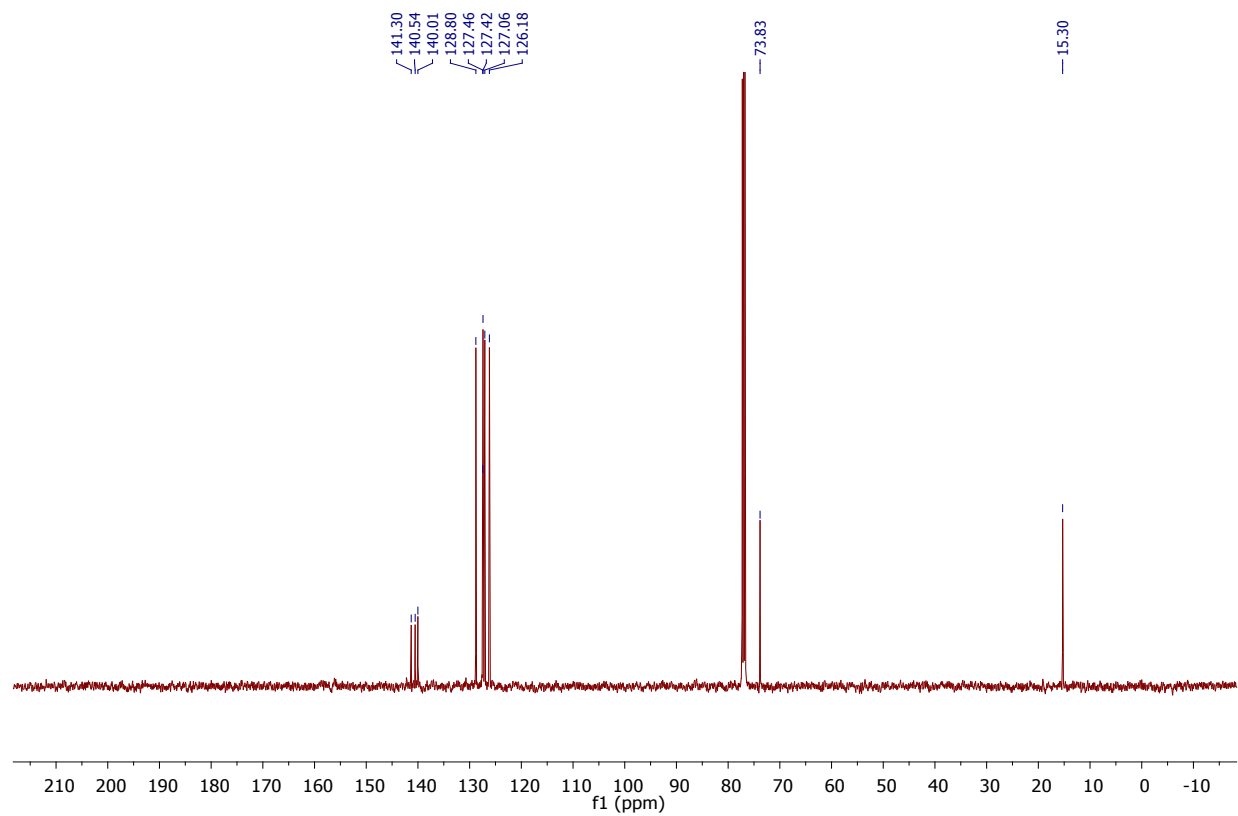

<sup>1</sup>H NMR Spectrum of compound **4e** in CDCl<sub>3</sub>

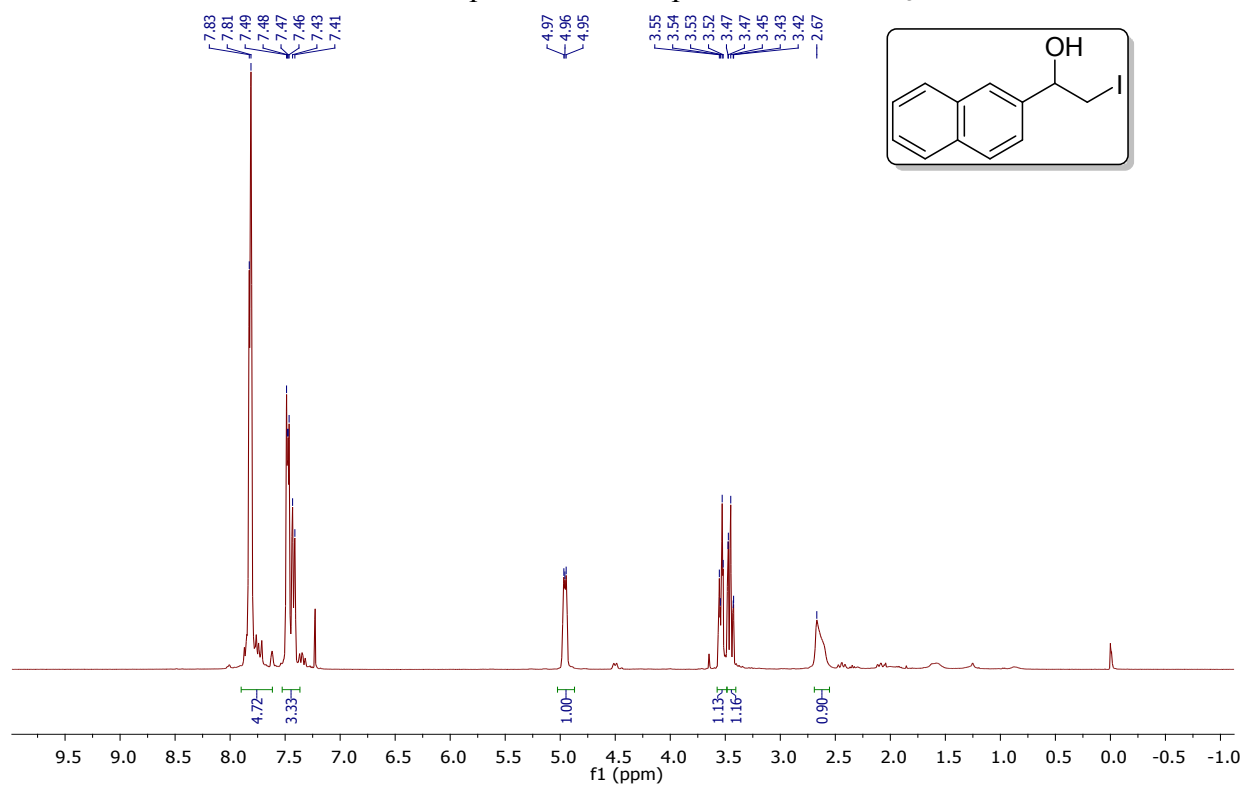

<sup>13</sup>C NMR Spectrum of compound **4e** in CDCl<sub>3</sub>

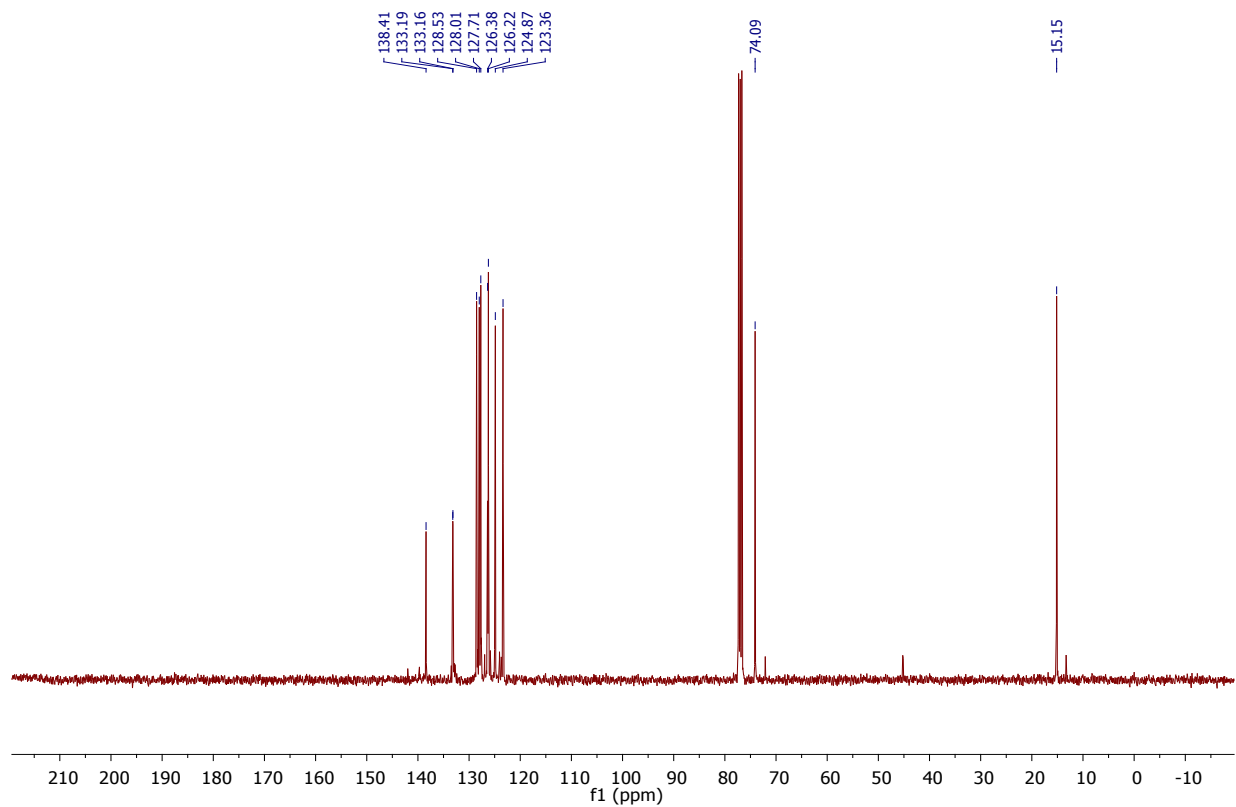

<sup>1</sup>H NMR Spectrum of compound **4f** in CDCl<sub>3</sub>

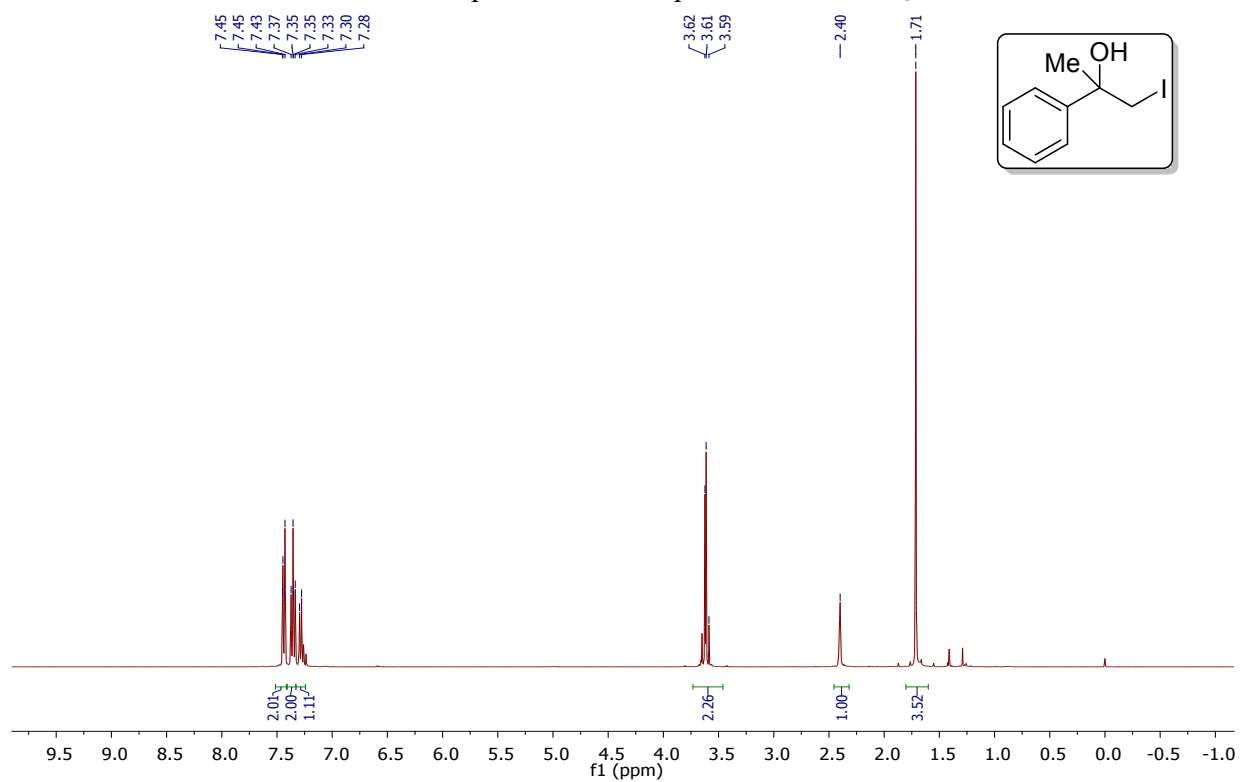

<sup>13</sup>C NMR Spectrum of compound **4f** in CDCl<sub>3</sub>

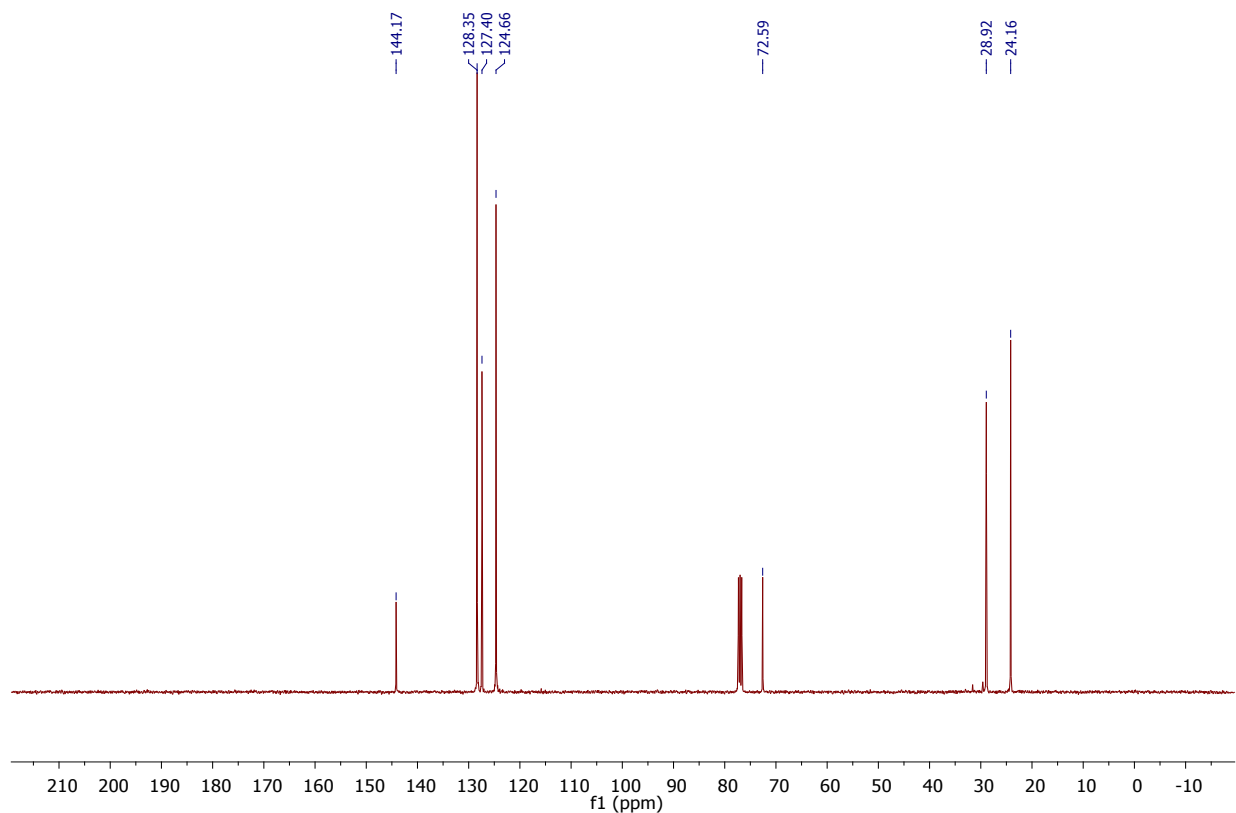



<sup>1</sup>H NMR Spectrum of compound **4g** in CDCl<sub>3</sub>

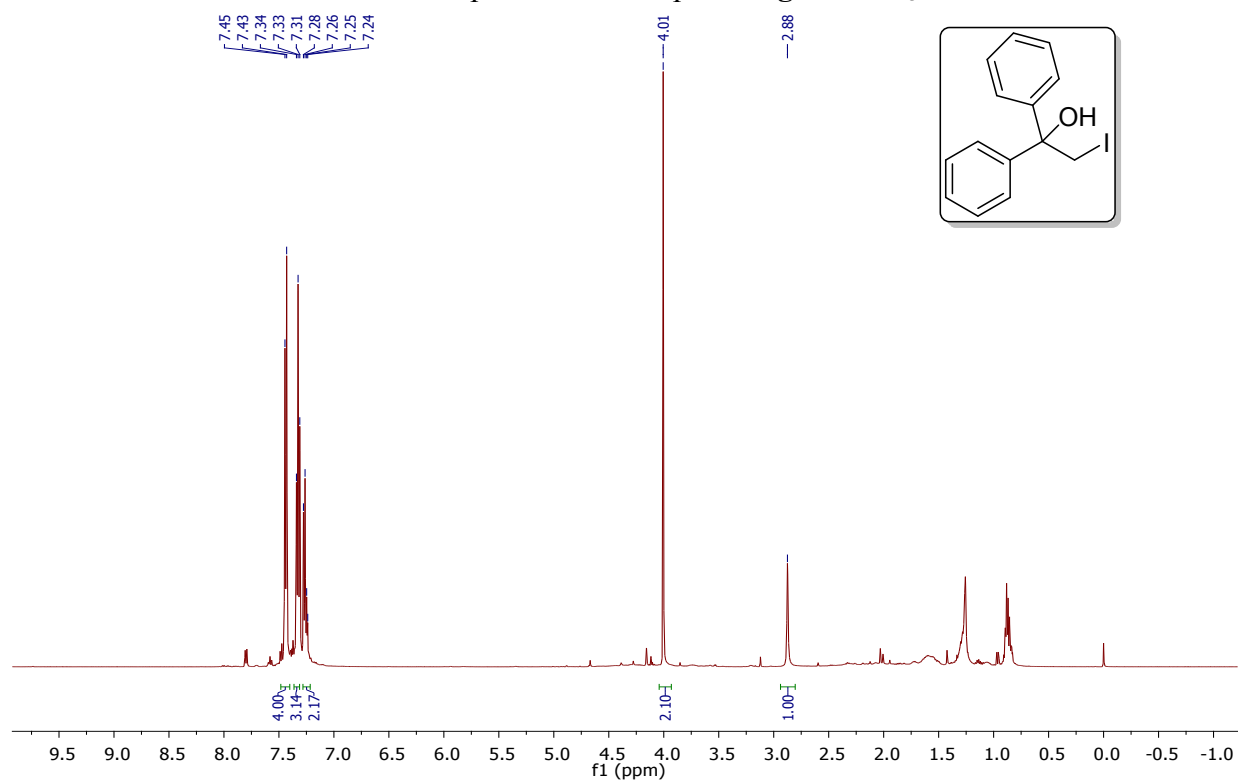

<sup>13</sup>C NMR Spectrum of compound **4g** in CDCl<sub>3</sub>

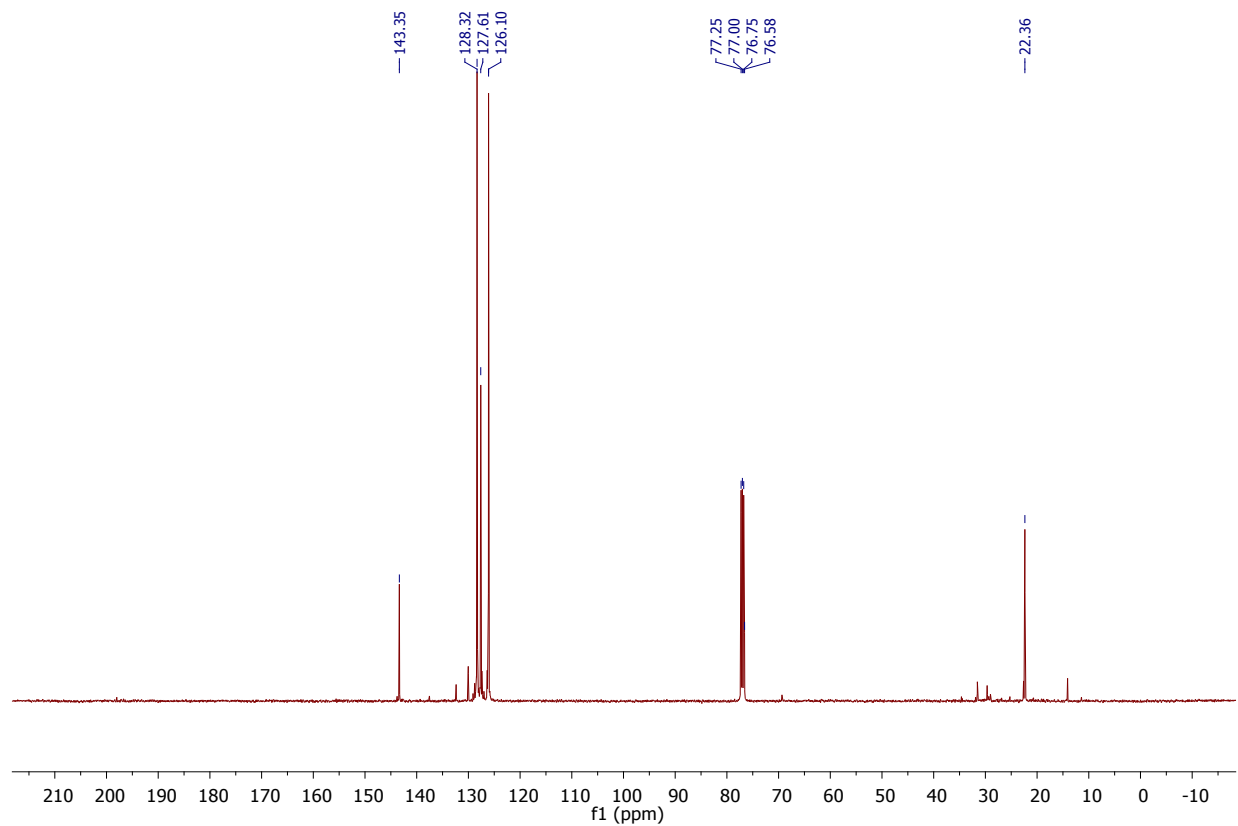

<sup>1</sup>H NMR Spectrum of compound **4h** in CDCl<sub>3</sub>

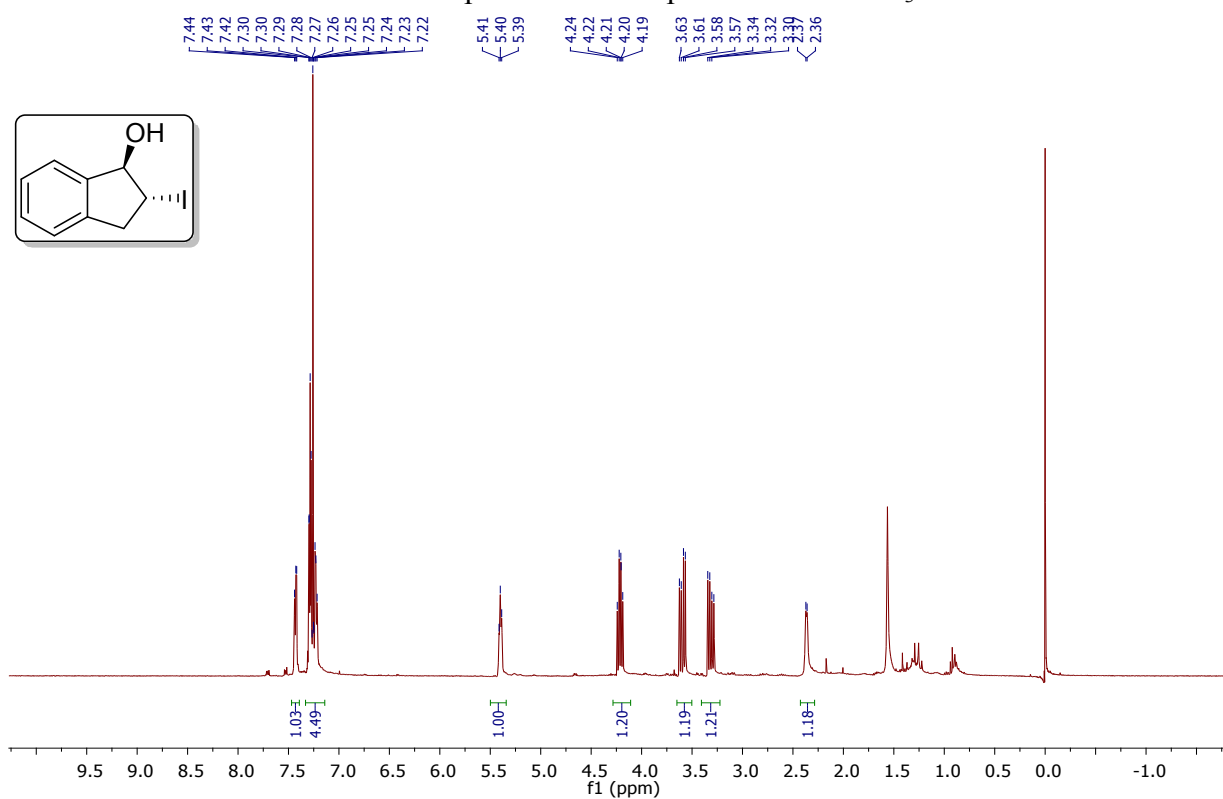

<sup>13</sup>C NMR Spectrum of compound **4h** in CDCl<sub>3</sub>

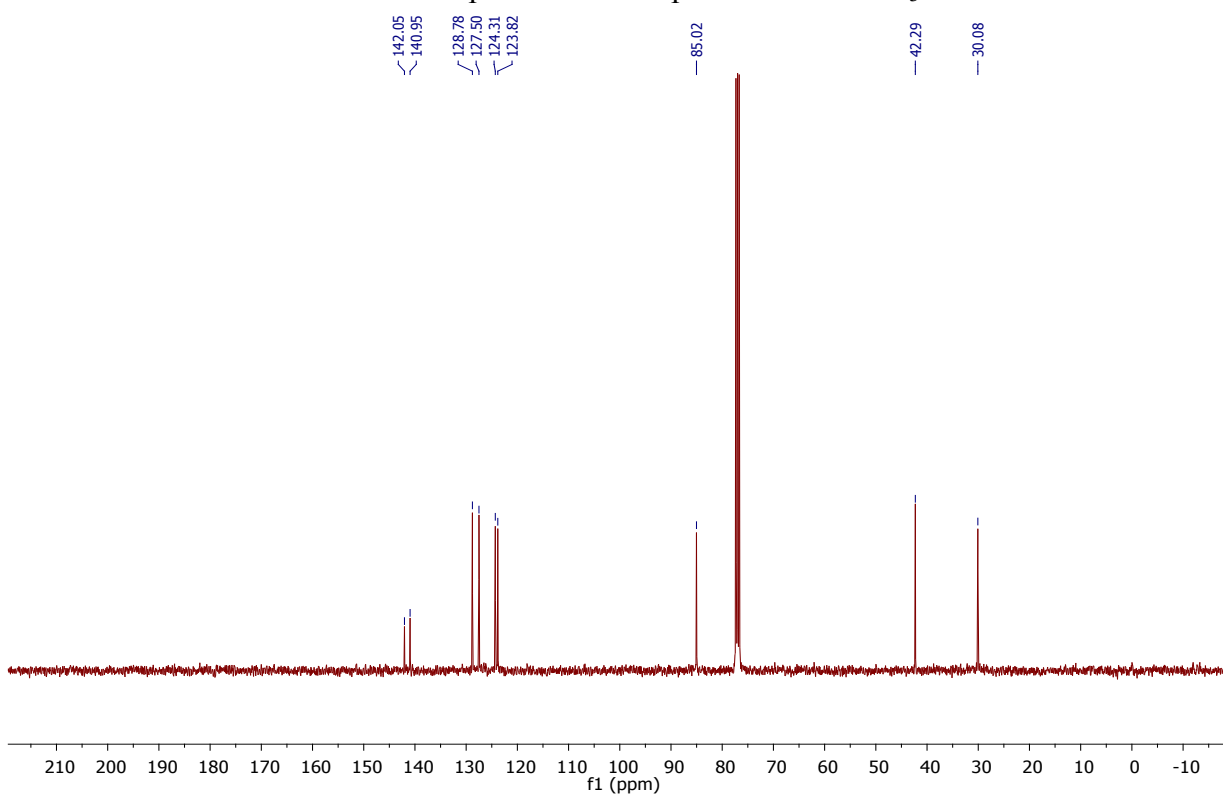

<sup>1</sup>H NMR Spectrum of compound **4i** in CDCl<sub>3</sub>

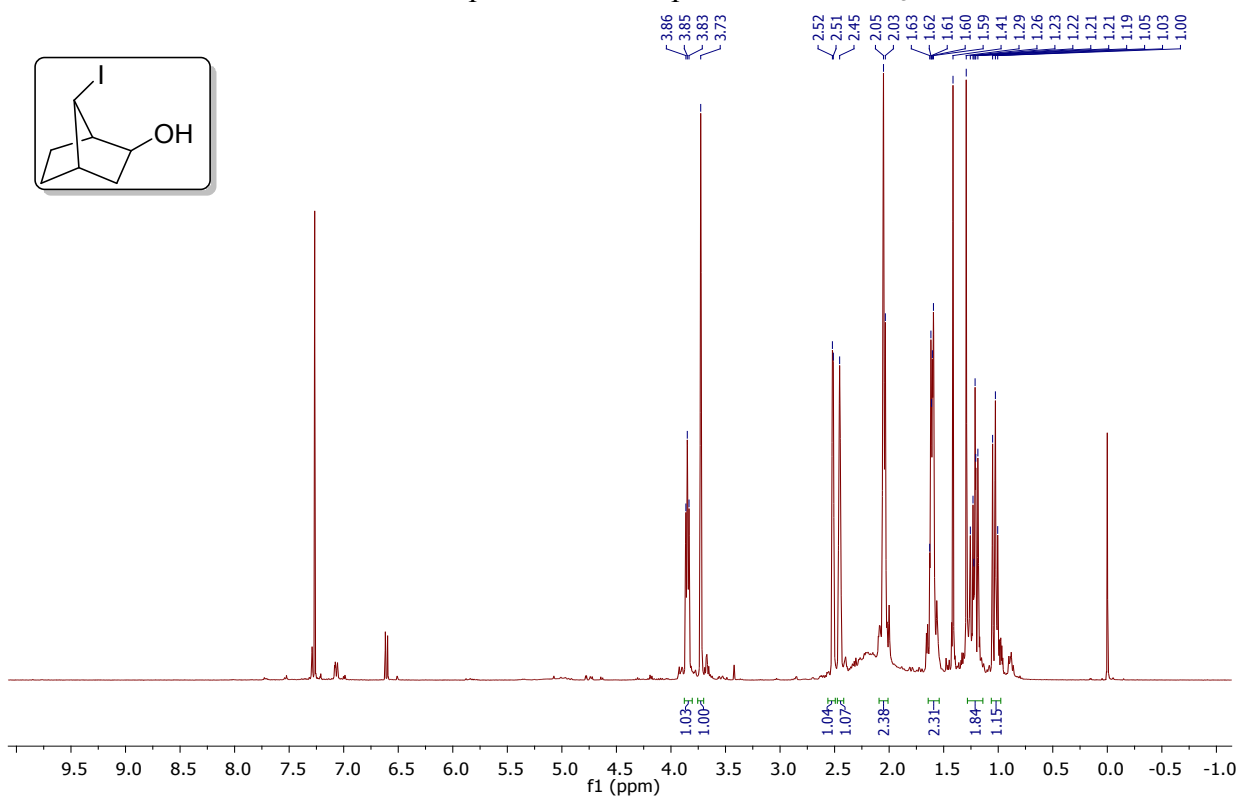

<sup>13</sup>C NMR Spectrum of compound **4i** in CDCl<sub>3</sub>

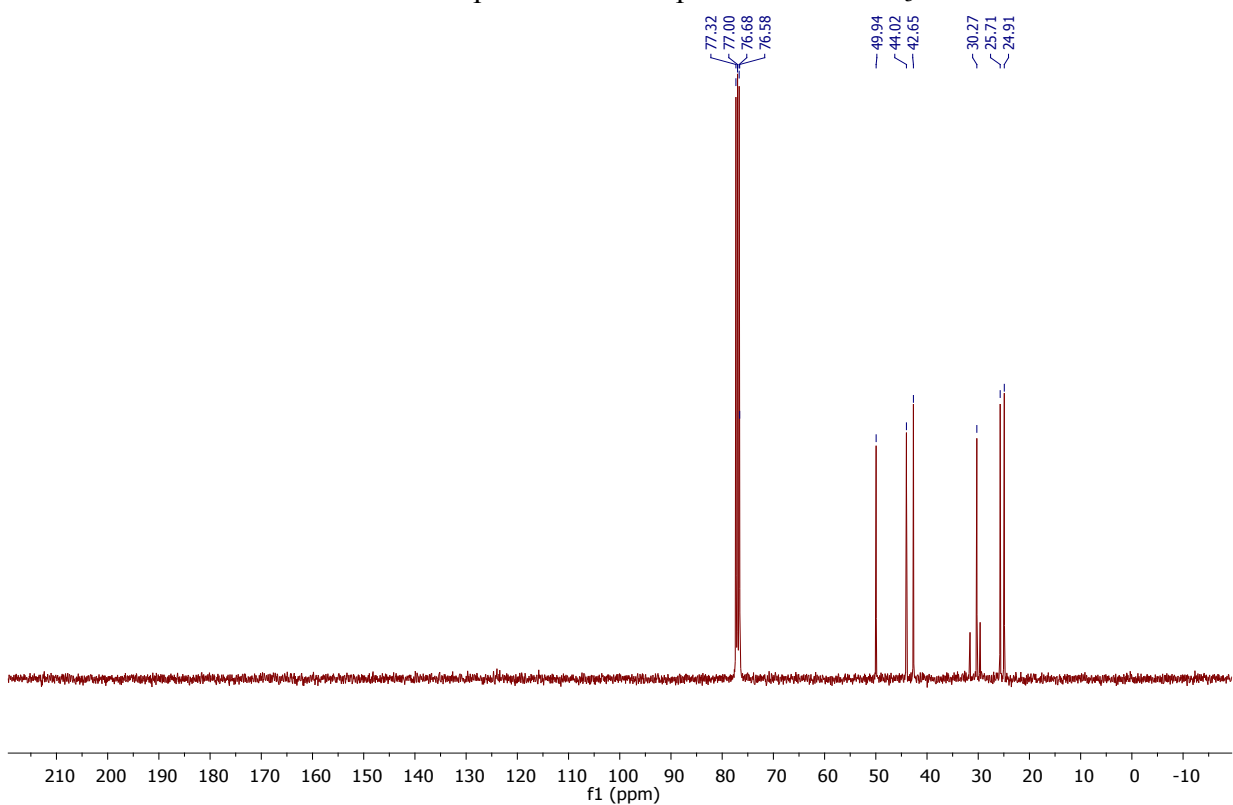

### $^1\text{H}$ NMR Spectrum of compound **4j** in $\text{CDCl}_3$

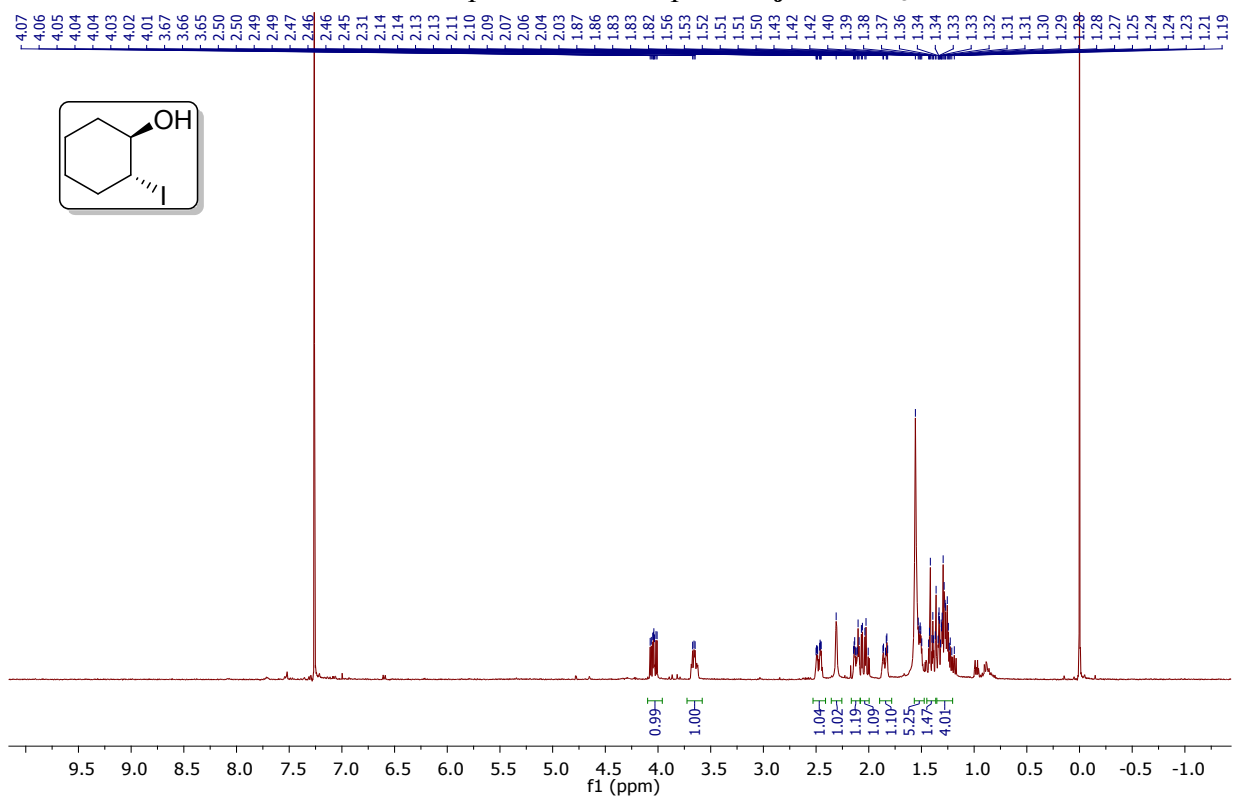

### $^{13}\text{C}$ NMR Spectrum of compound **4j** in $\text{CDCl}_3$

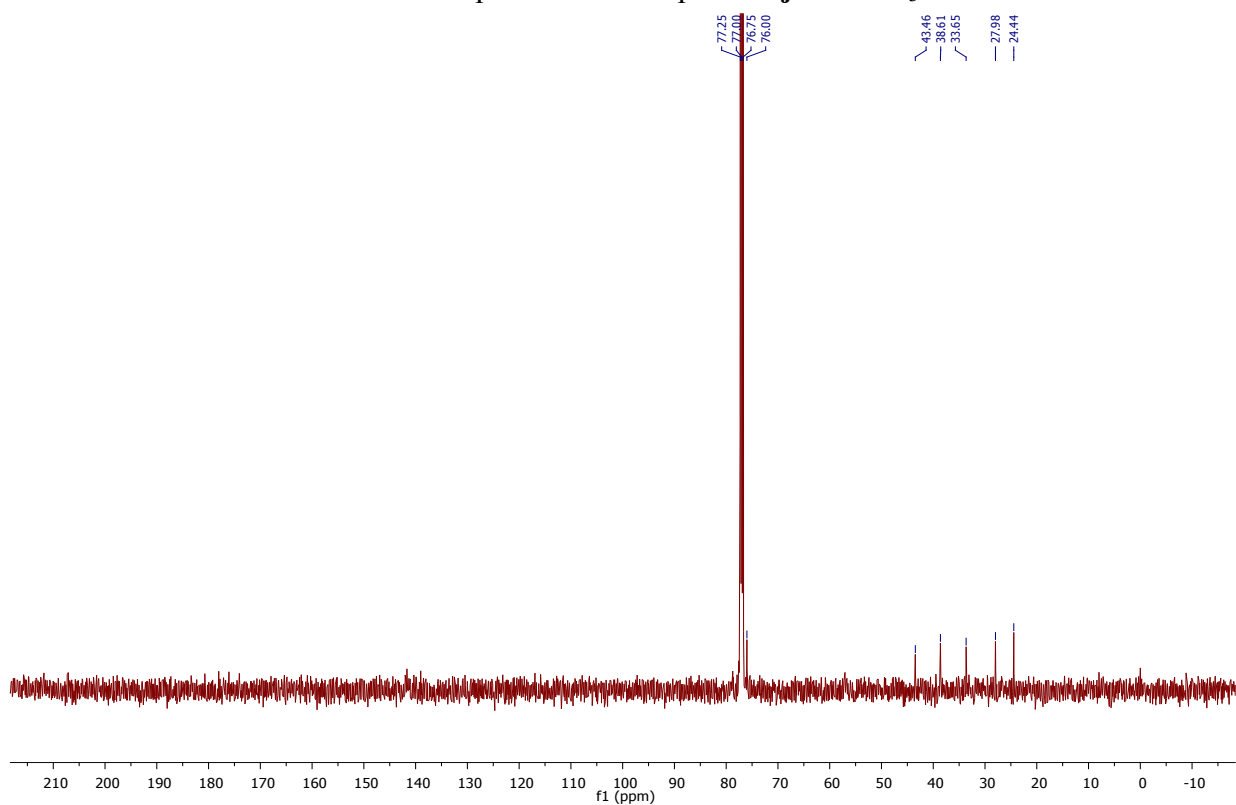

<sup>1</sup>H NMR Spectrum of compound **4k** in CDCl<sub>3</sub>

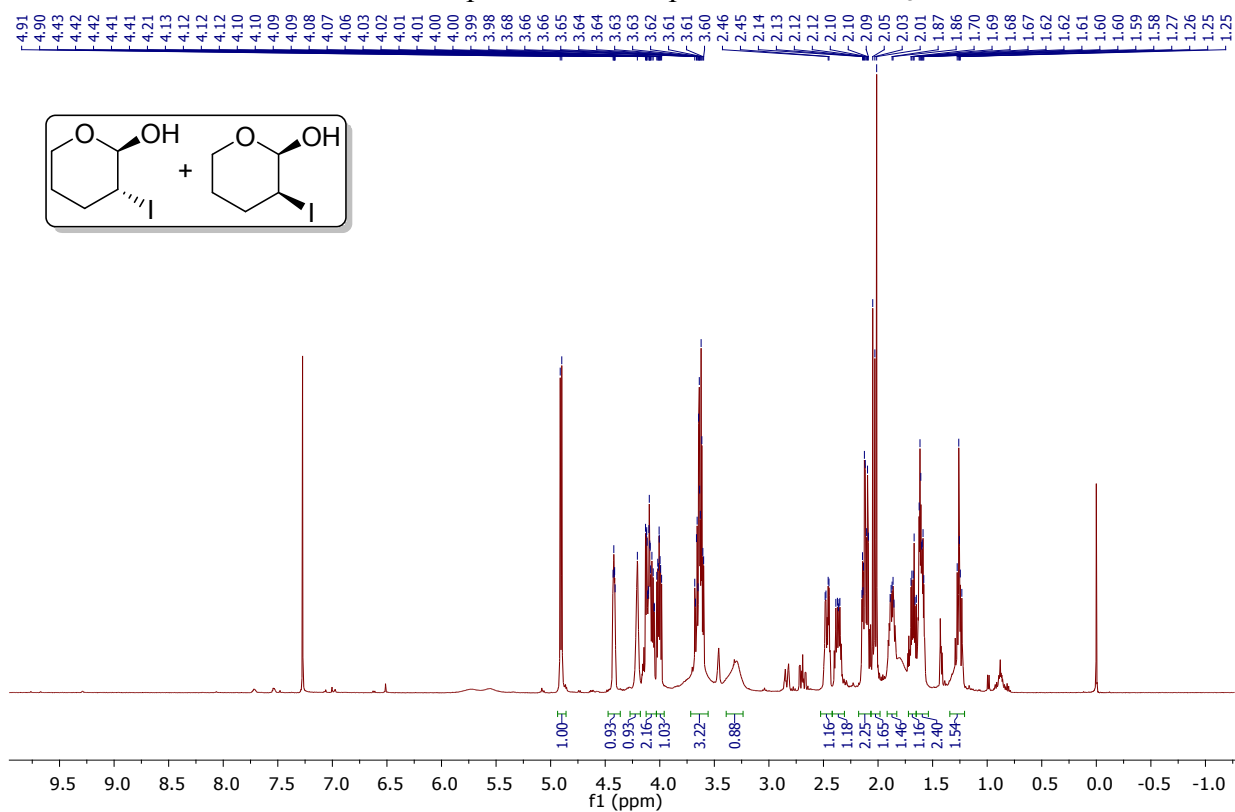

<sup>13</sup>C NMR Spectrum of compound **4k** in CDCl<sub>3</sub>

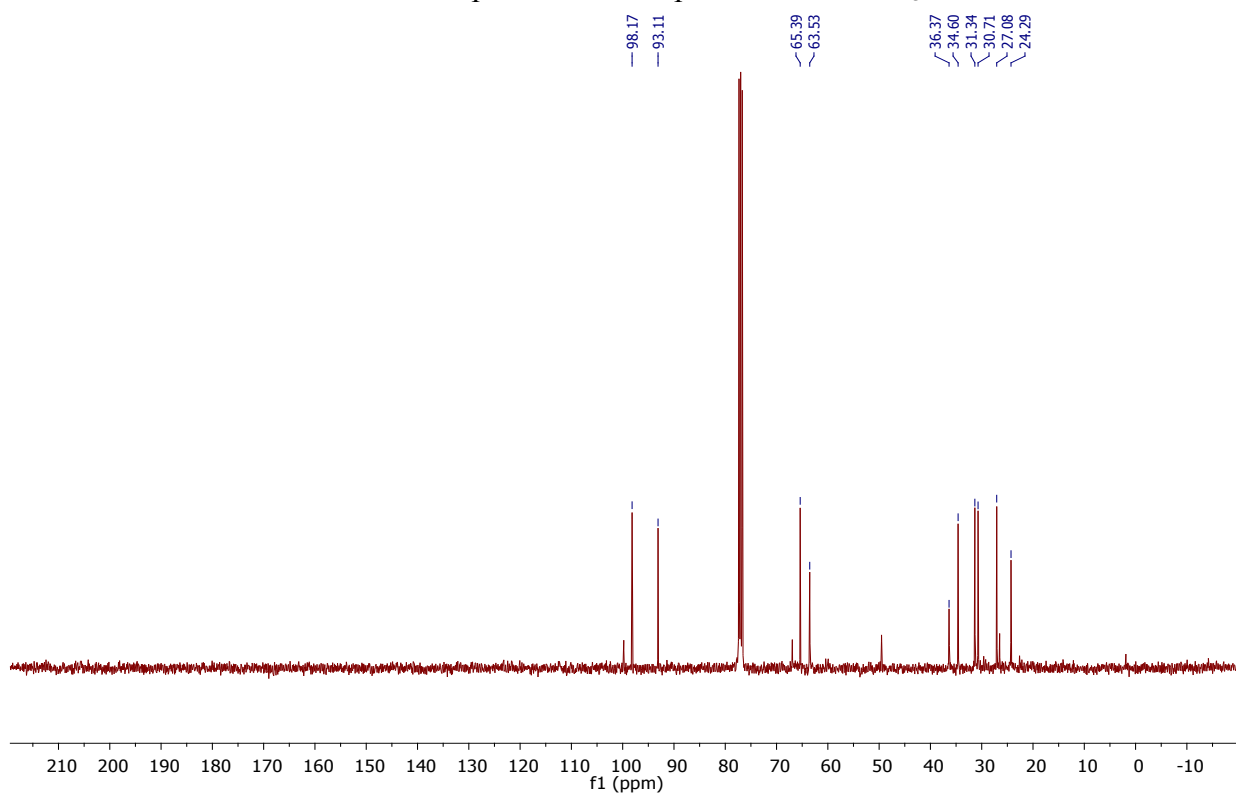

<sup>1</sup>H NMR Spectrum of compound **5a** in CDCl<sub>3</sub>

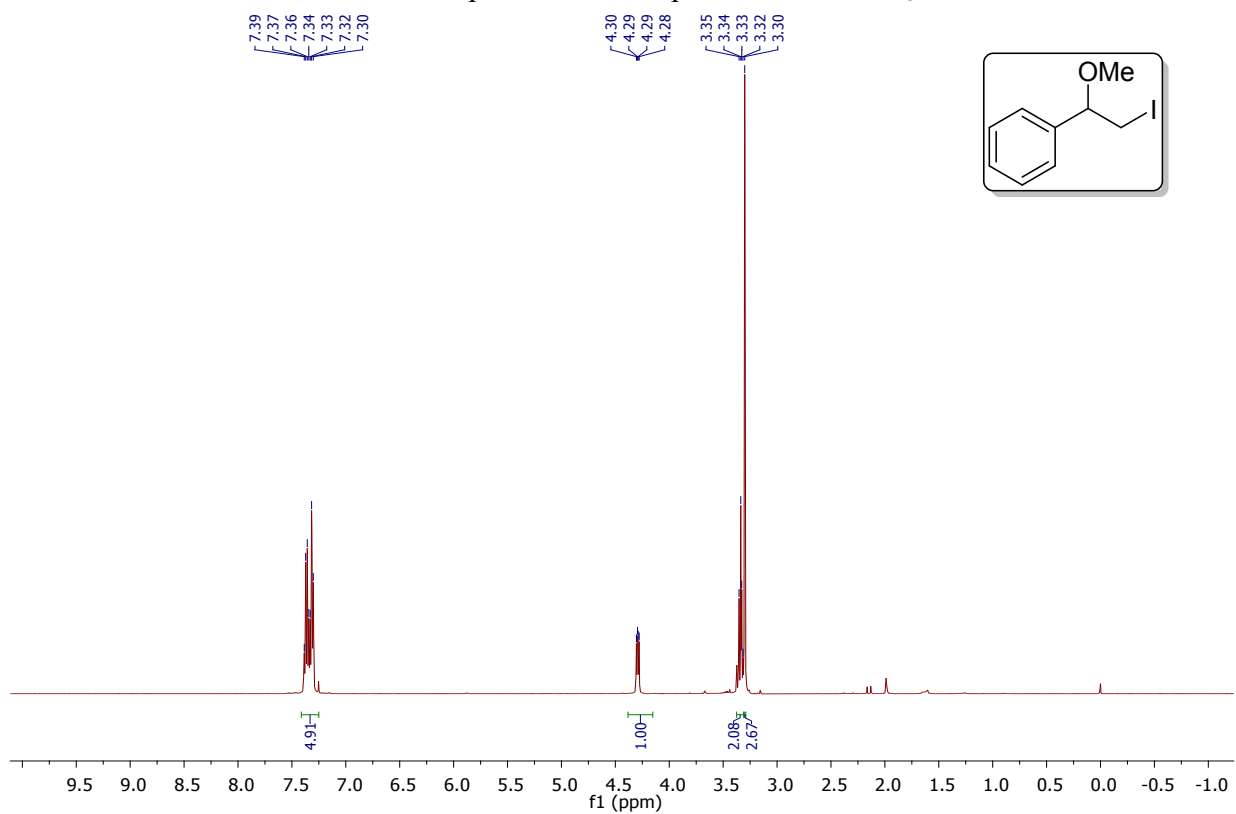

<sup>13</sup>C NMR Spectrum of compound **5a** in CDCl<sub>3</sub>

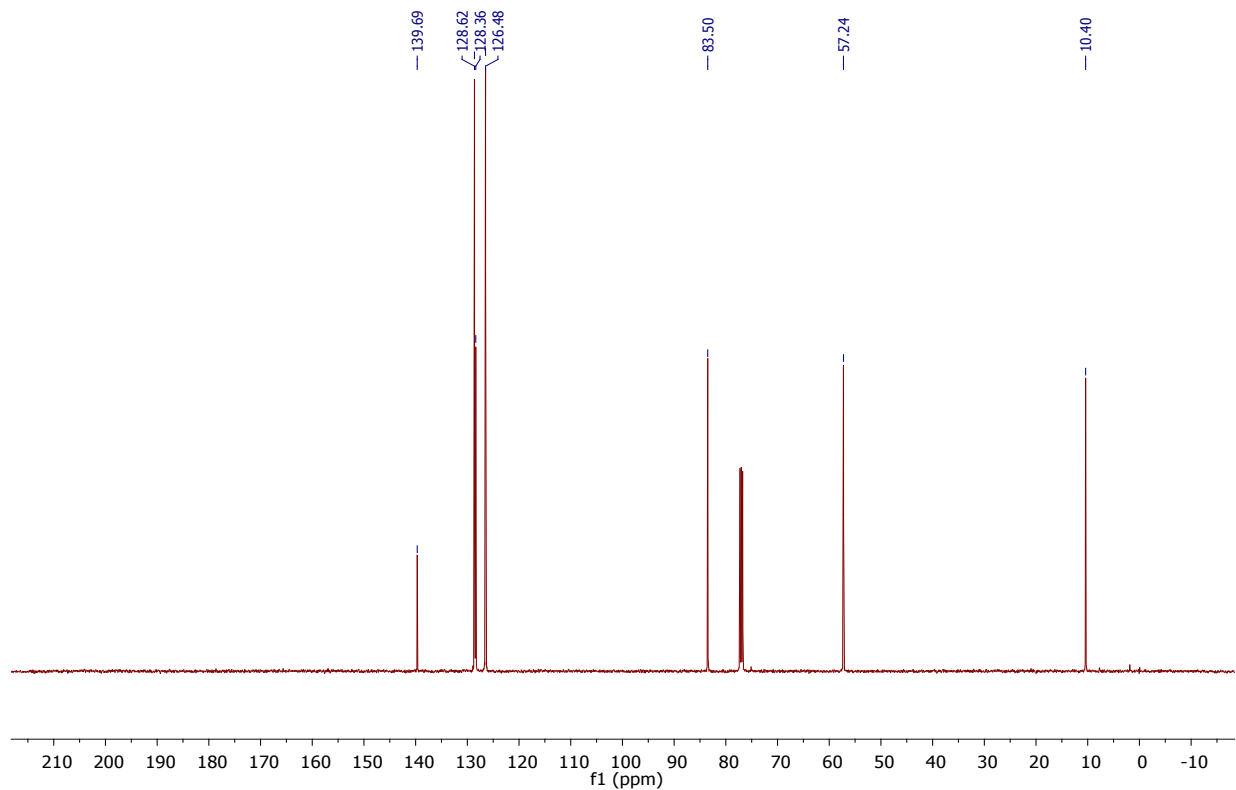

<sup>1</sup>H NMR Spectrum of compound **5b** in CDCl<sub>3</sub>

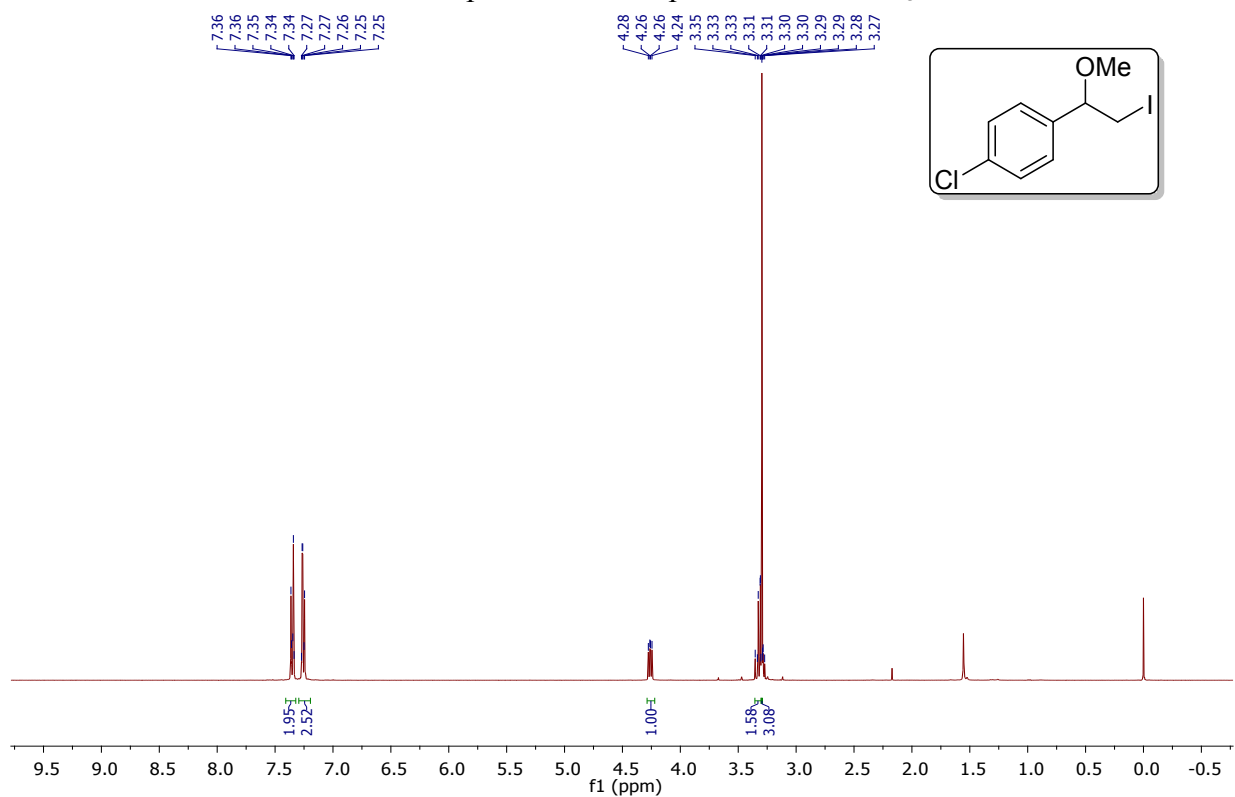

<sup>13</sup>C NMR Spectrum of compound **5b** in CDCl<sub>3</sub>

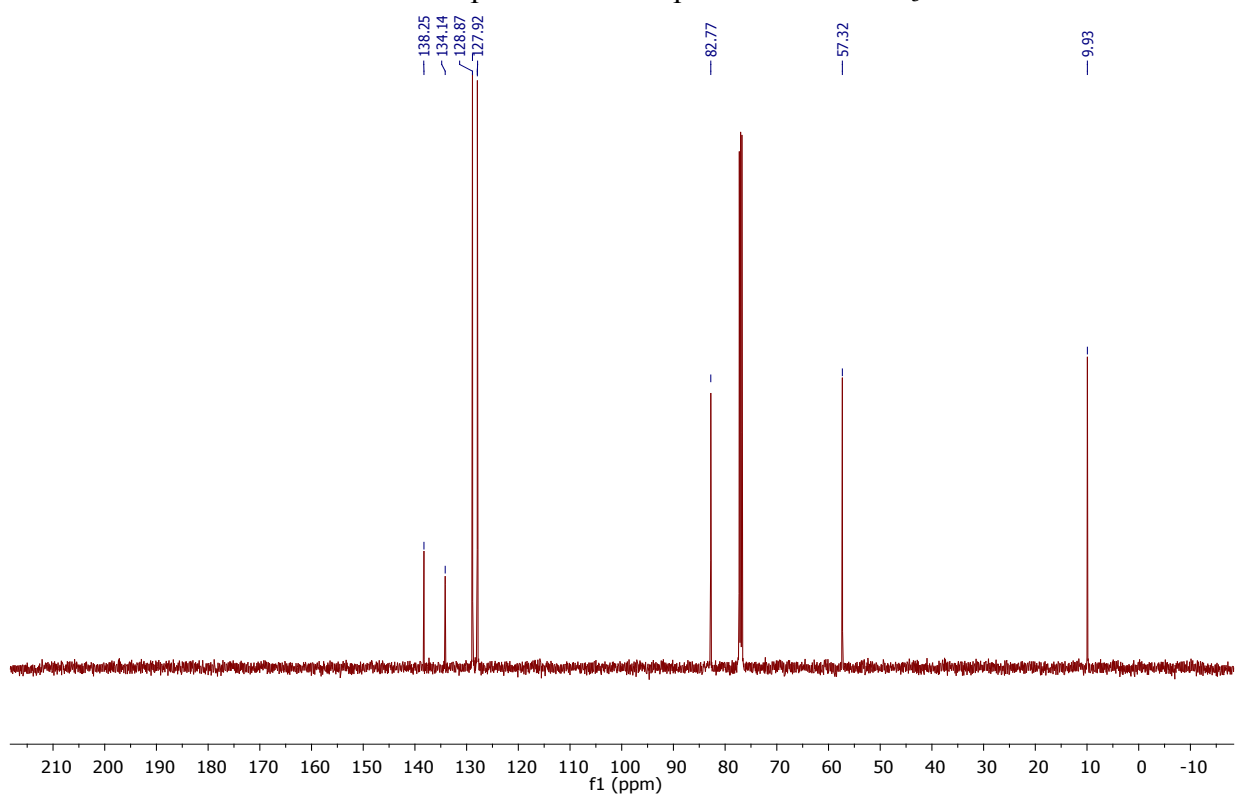

<sup>1</sup>H NMR Spectrum of compound **5c** in CDCl<sub>3</sub>

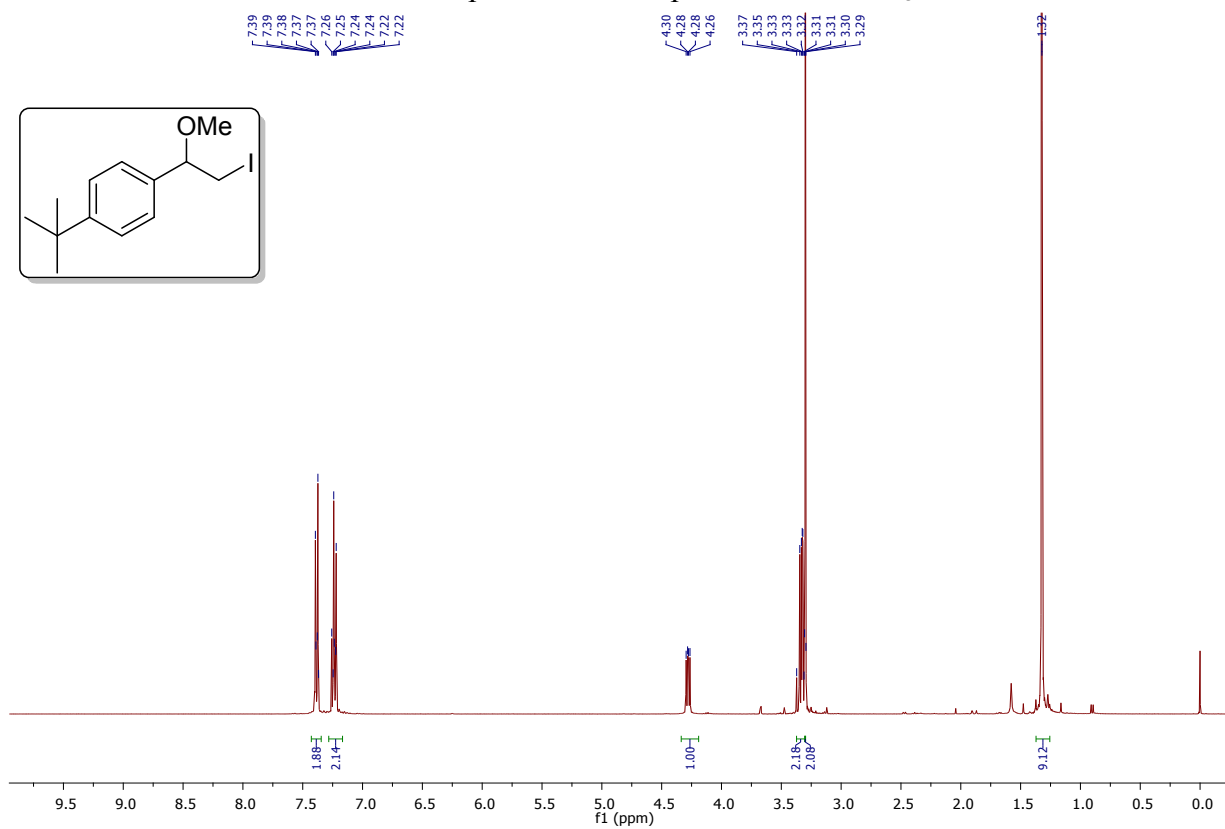

<sup>13</sup>C NMR Spectrum of compound **5c** in CDCl<sub>3</sub>

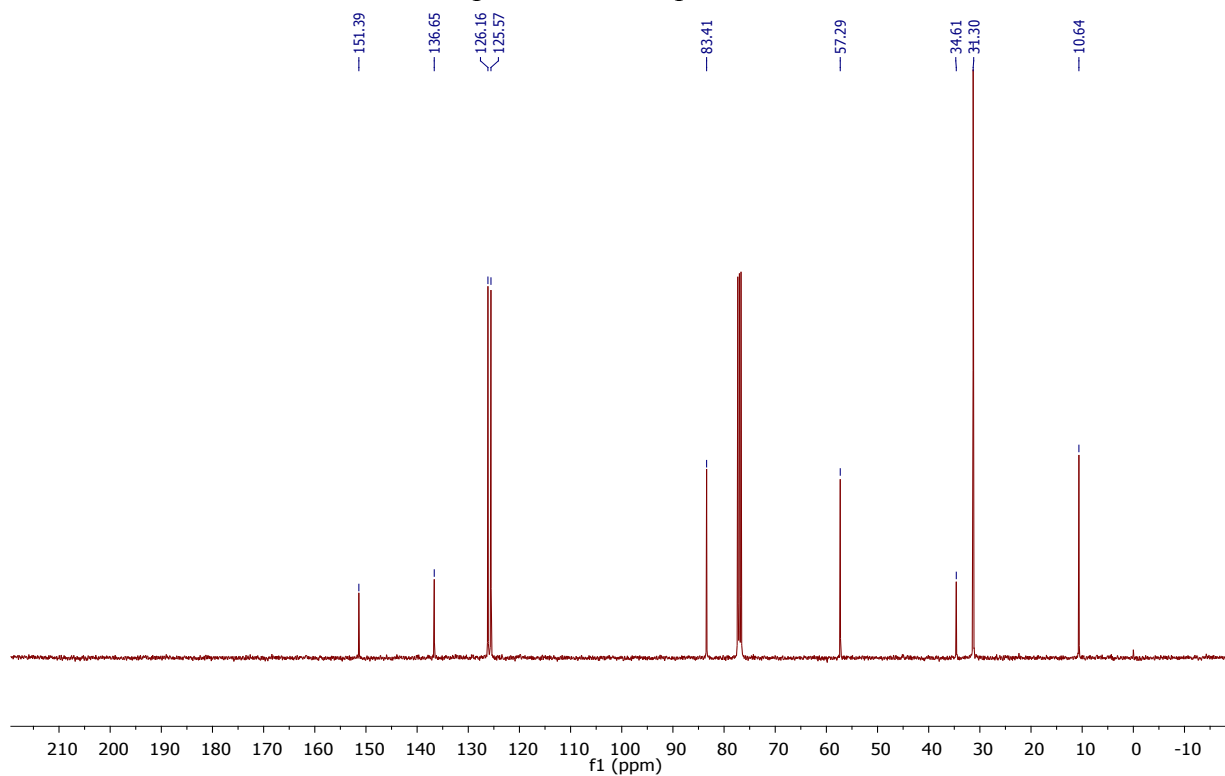



<sup>1</sup>H NMR Spectrum of compound **5d** in CDCl<sub>3</sub>

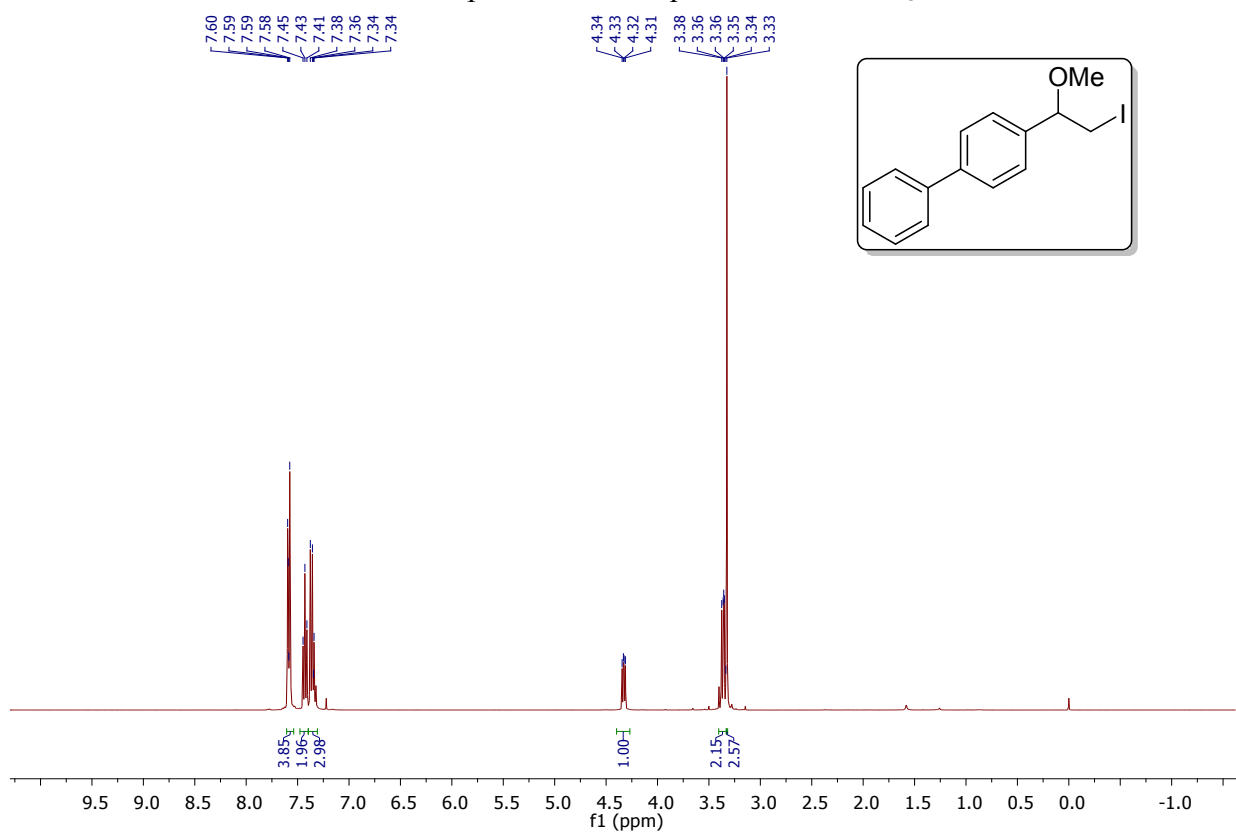

<sup>13</sup>C NMR Spectrum of compound **5d** in CDCl<sub>3</sub>

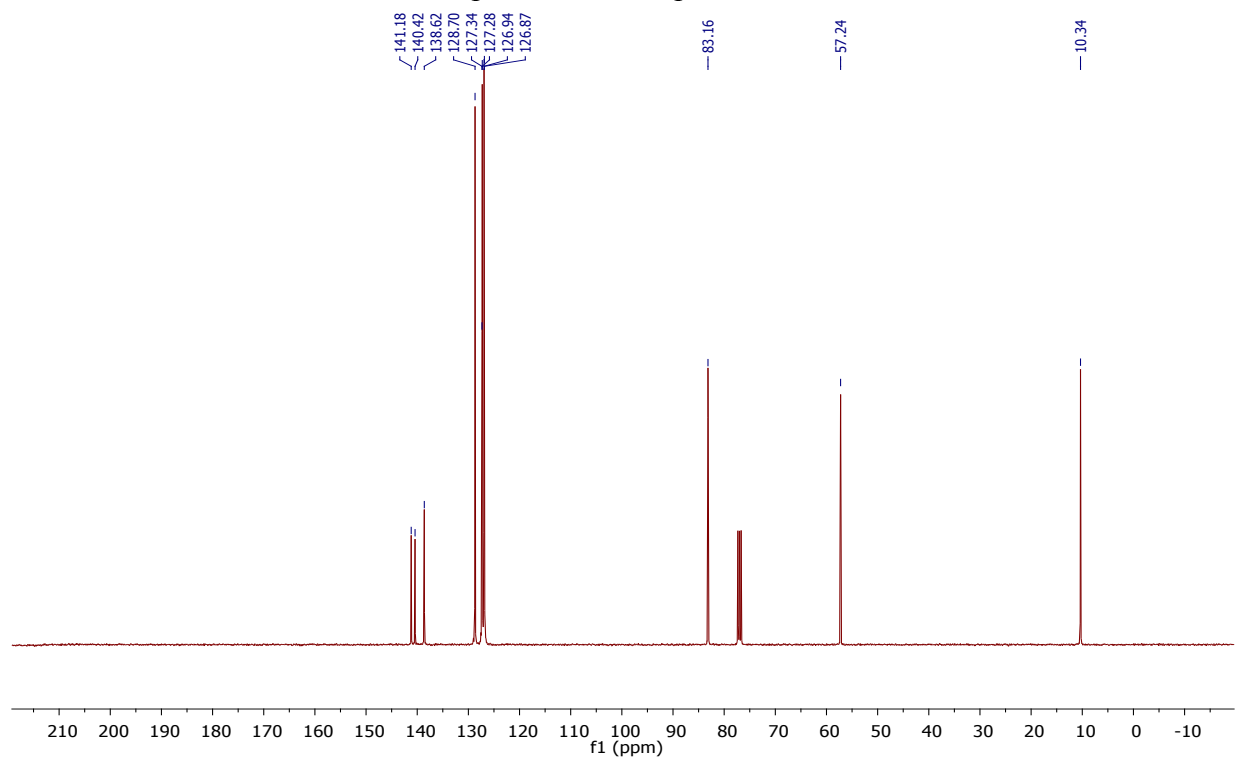

<sup>1</sup>H NMR Spectrum of compound **5e** in CDCl<sub>3</sub>

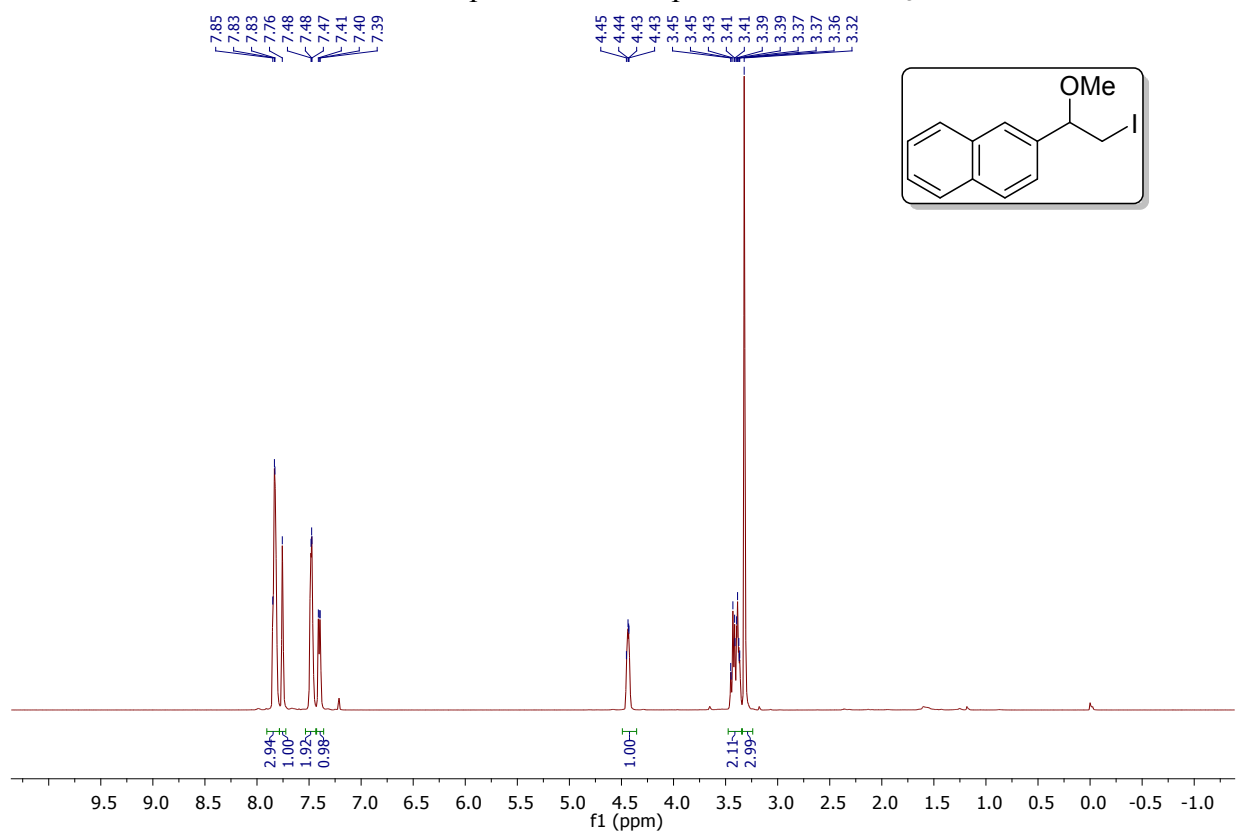

<sup>13</sup>C NMR Spectrum of compound **5e** in CDCl<sub>3</sub>

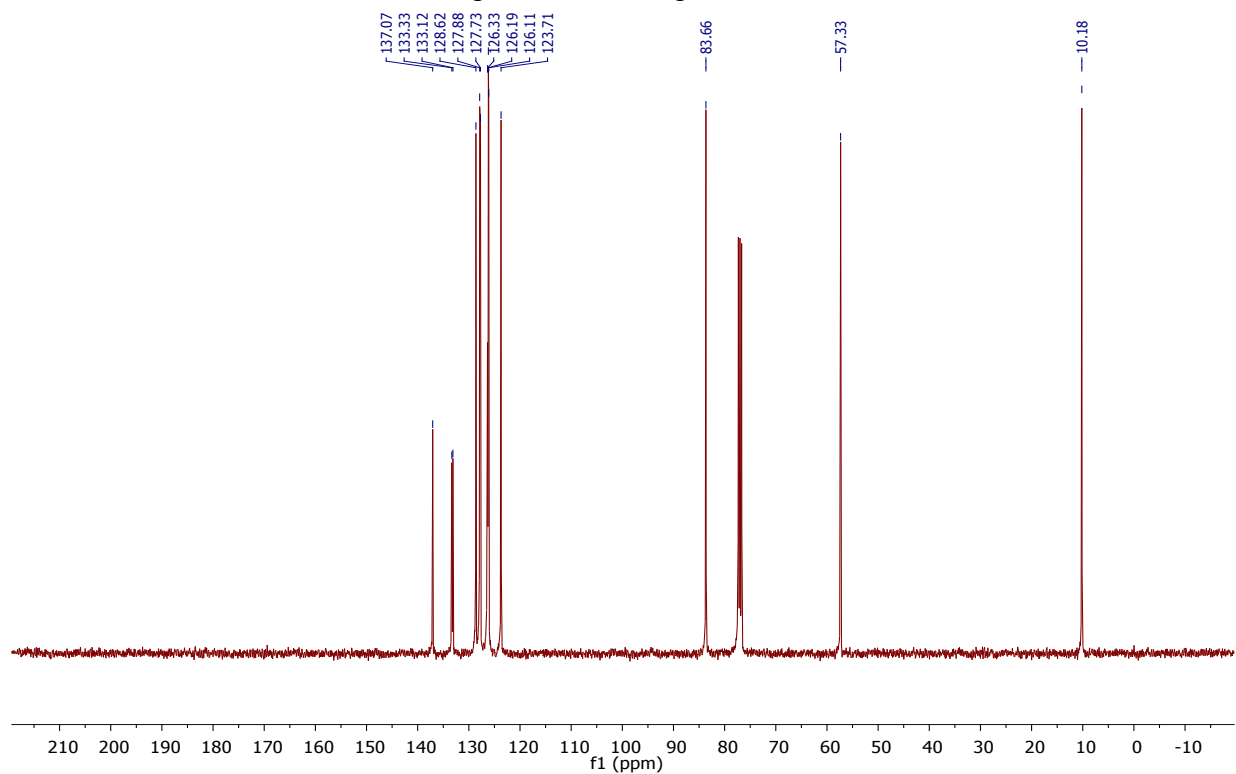

<sup>1</sup>H NMR Spectrum of compound **5f** in CDCl<sub>3</sub>

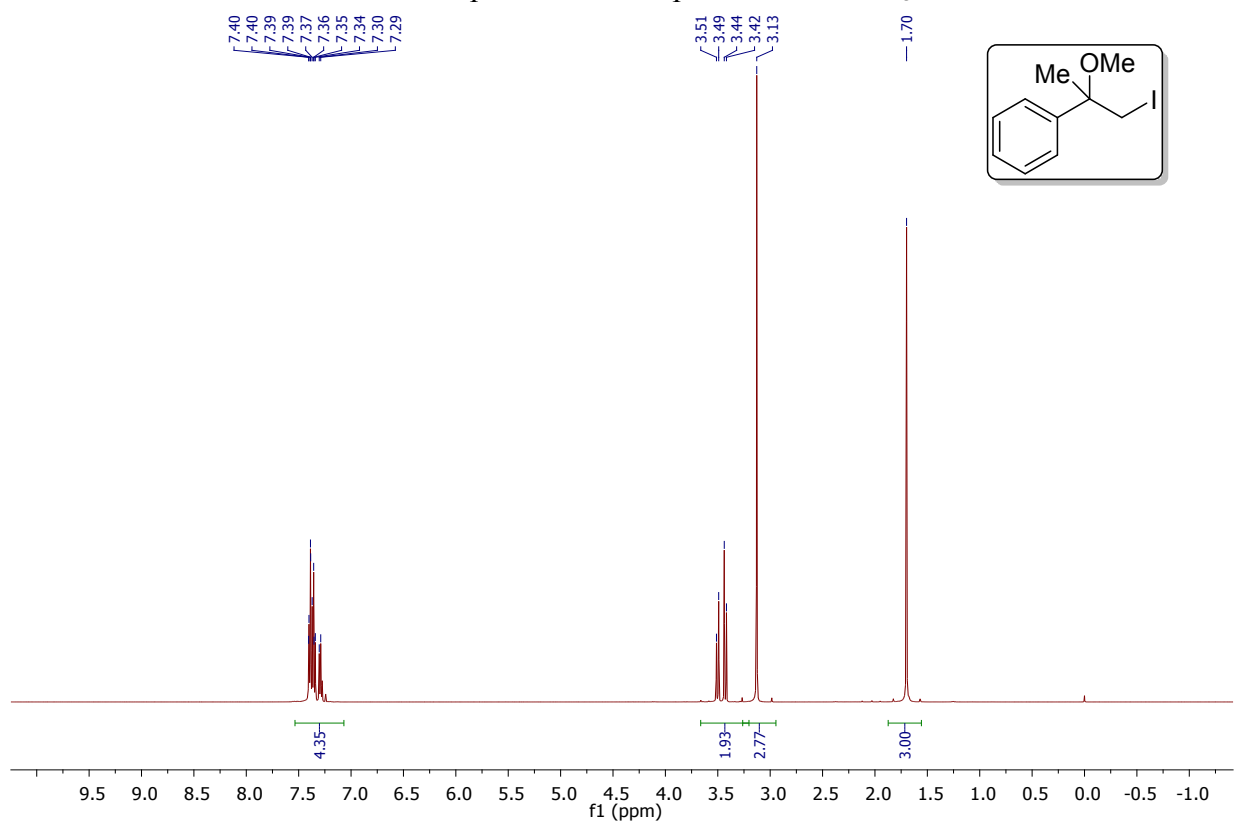

<sup>13</sup>C NMR Spectrum of compound **5f** in CDCl<sub>3</sub>

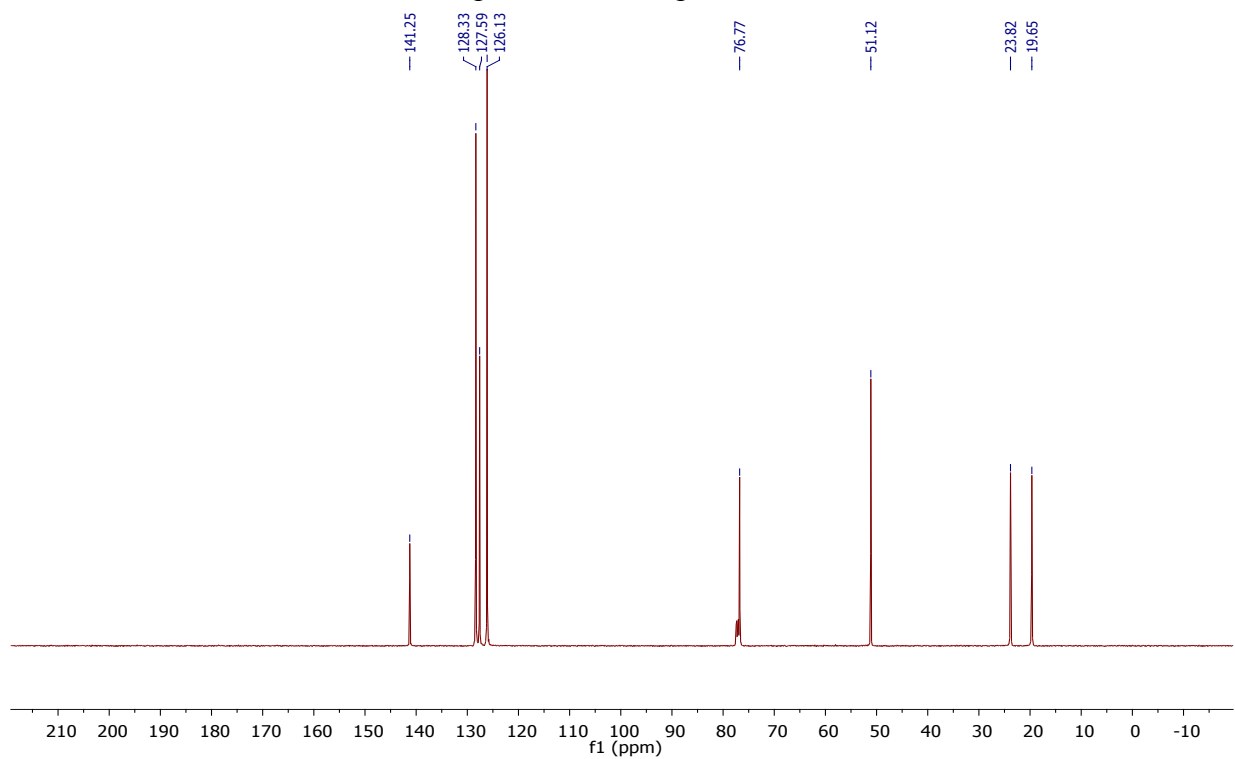

<sup>1</sup>H NMR Spectrum of compound **5g** in CDCl<sub>3</sub>

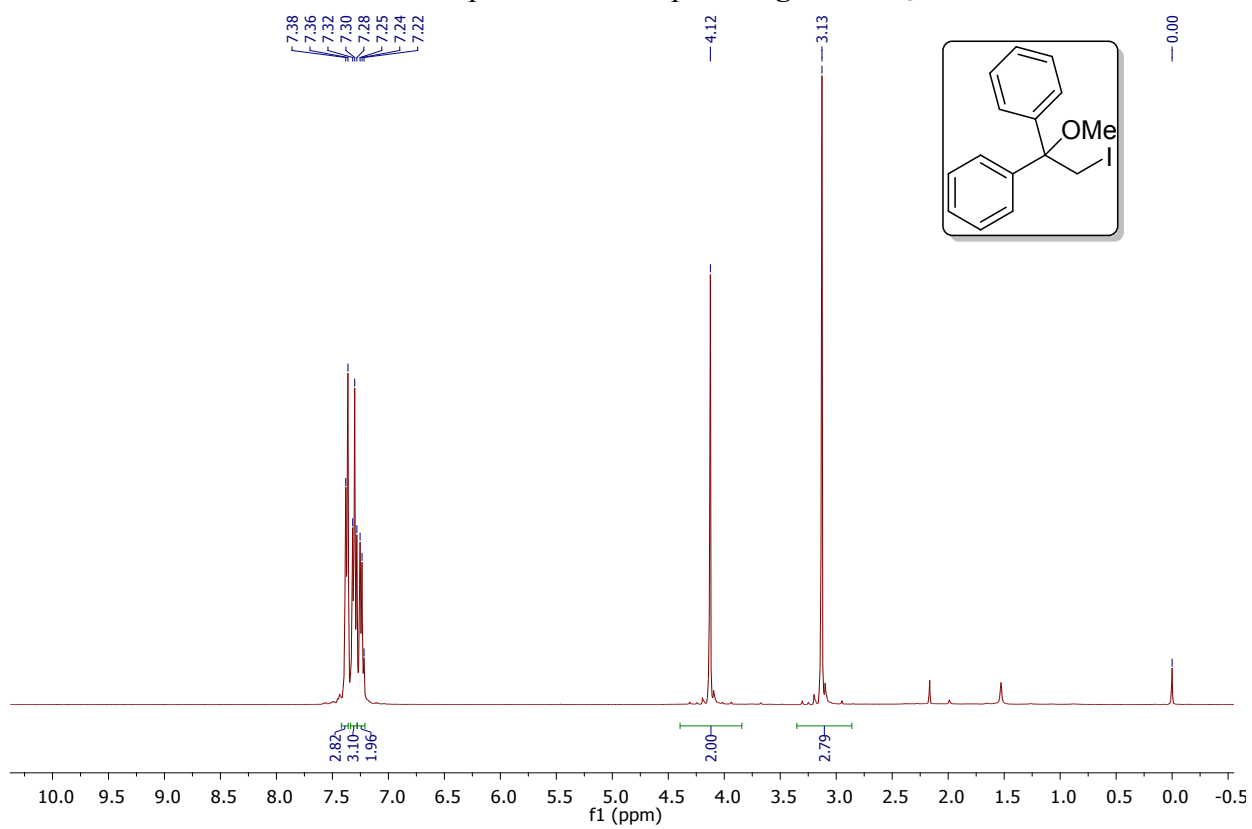

<sup>13</sup>C NMR Spectrum of compound **5g** in CDCl<sub>3</sub>

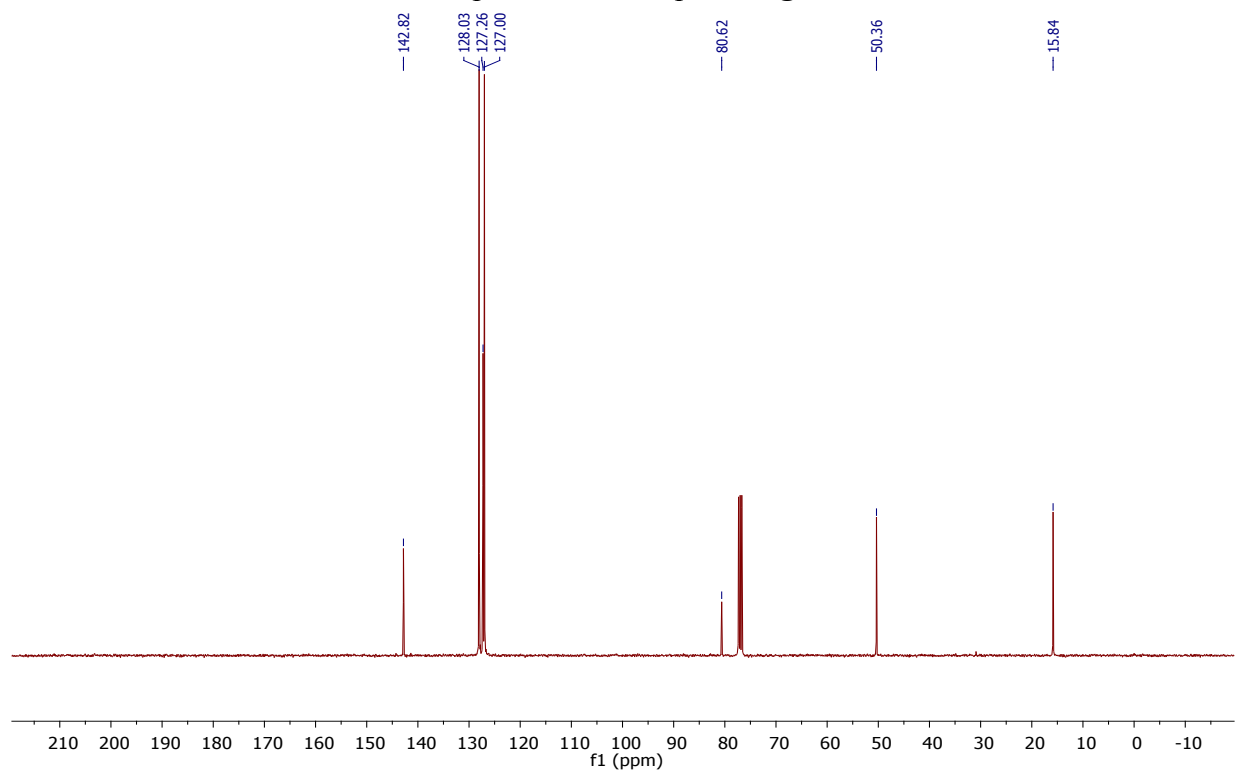

<sup>1</sup>H NMR Spectrum of compound **5h** in CDCl<sub>3</sub>

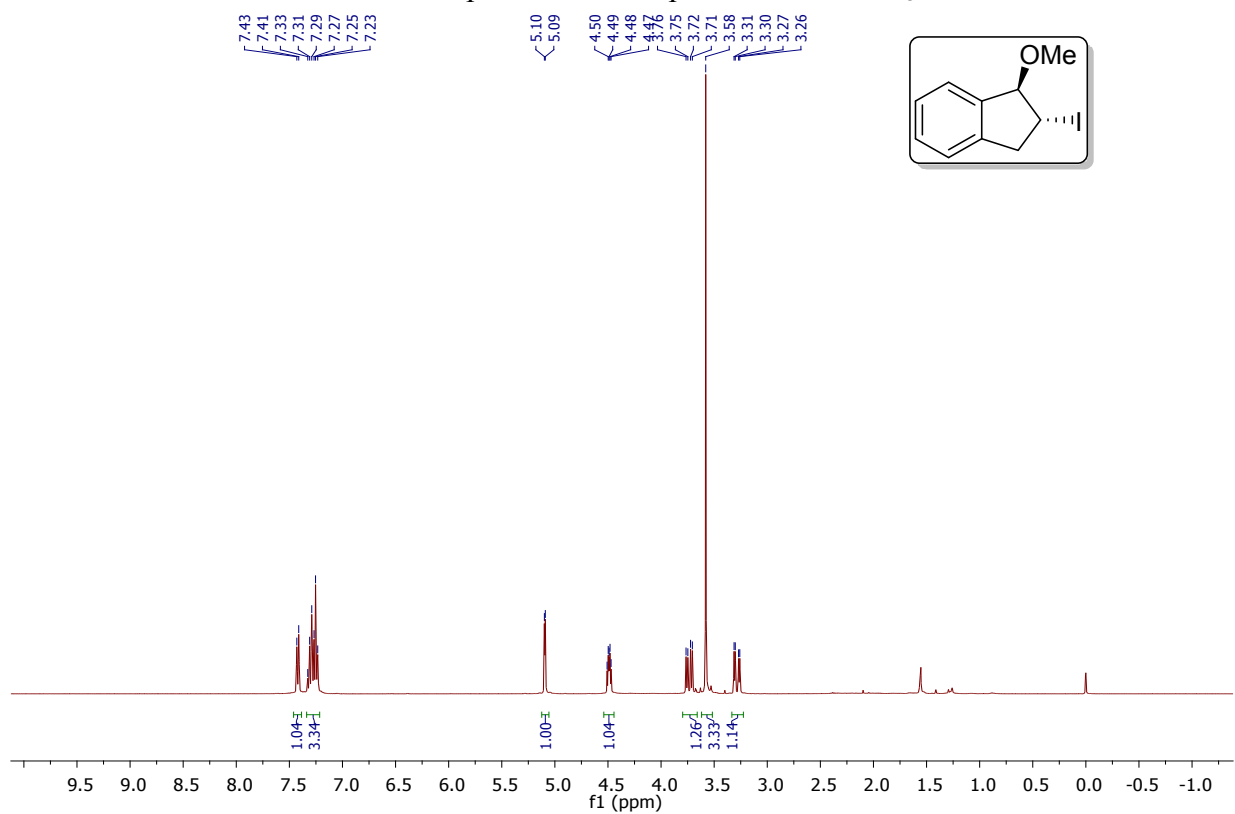

<sup>13</sup>C NMR Spectrum of compound **5h** in CDCl<sub>3</sub>

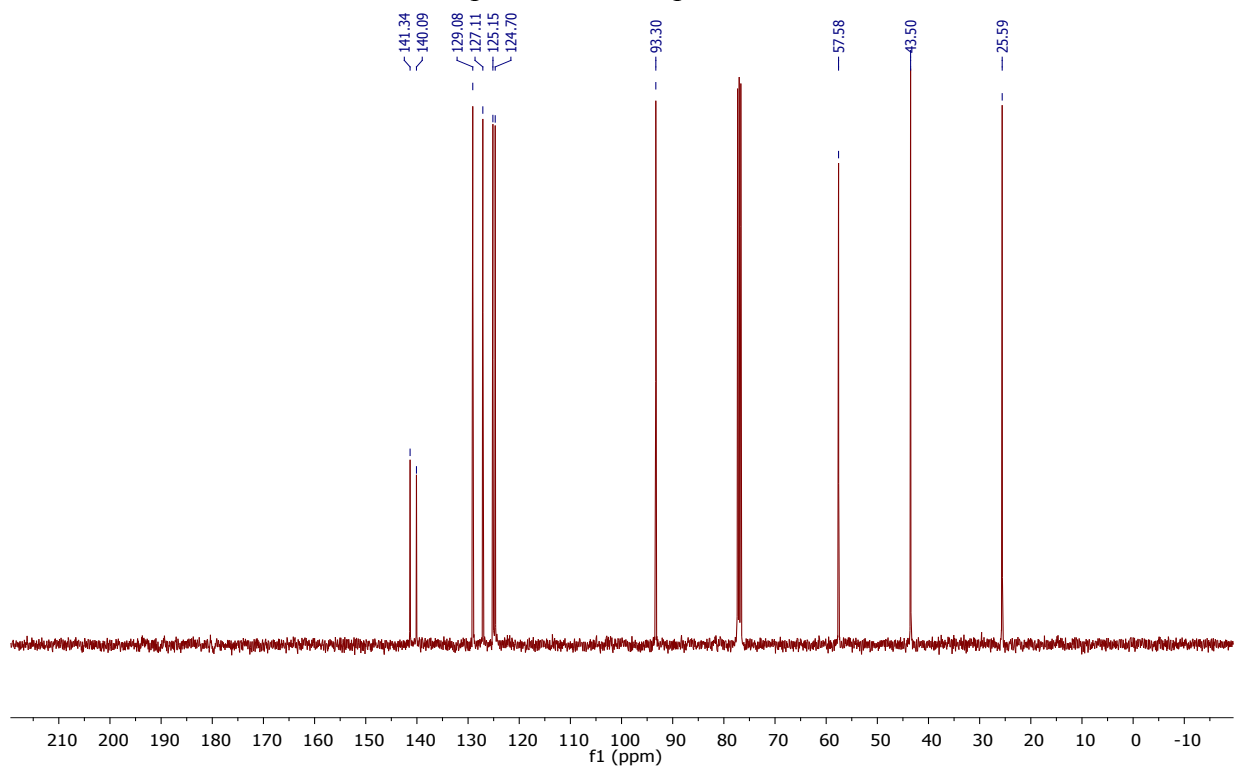

<sup>1</sup>H NMR Spectrum of compound **5i** in CDCl<sub>3</sub>

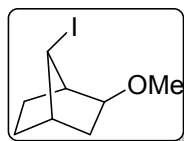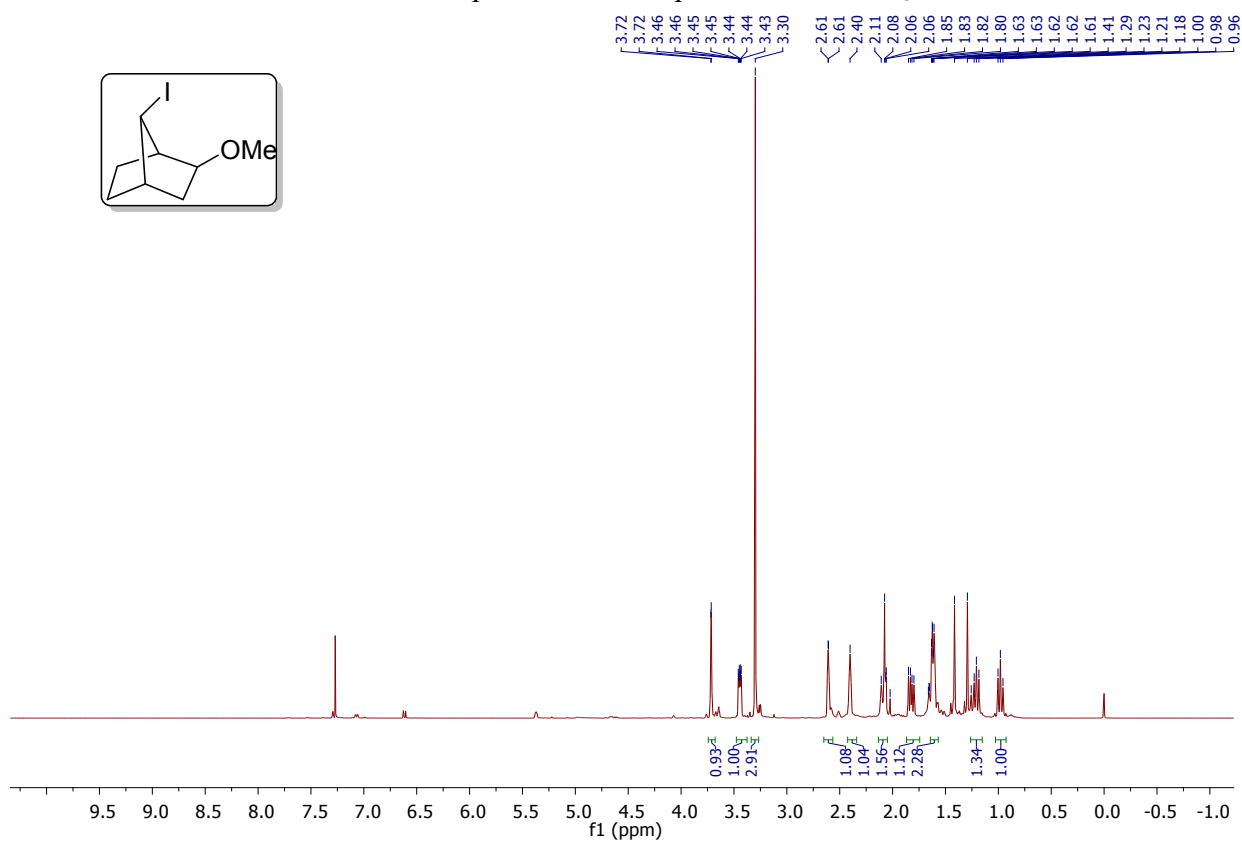

<sup>13</sup>C NMR Spectrum of compound **5i** in CDCl<sub>3</sub>

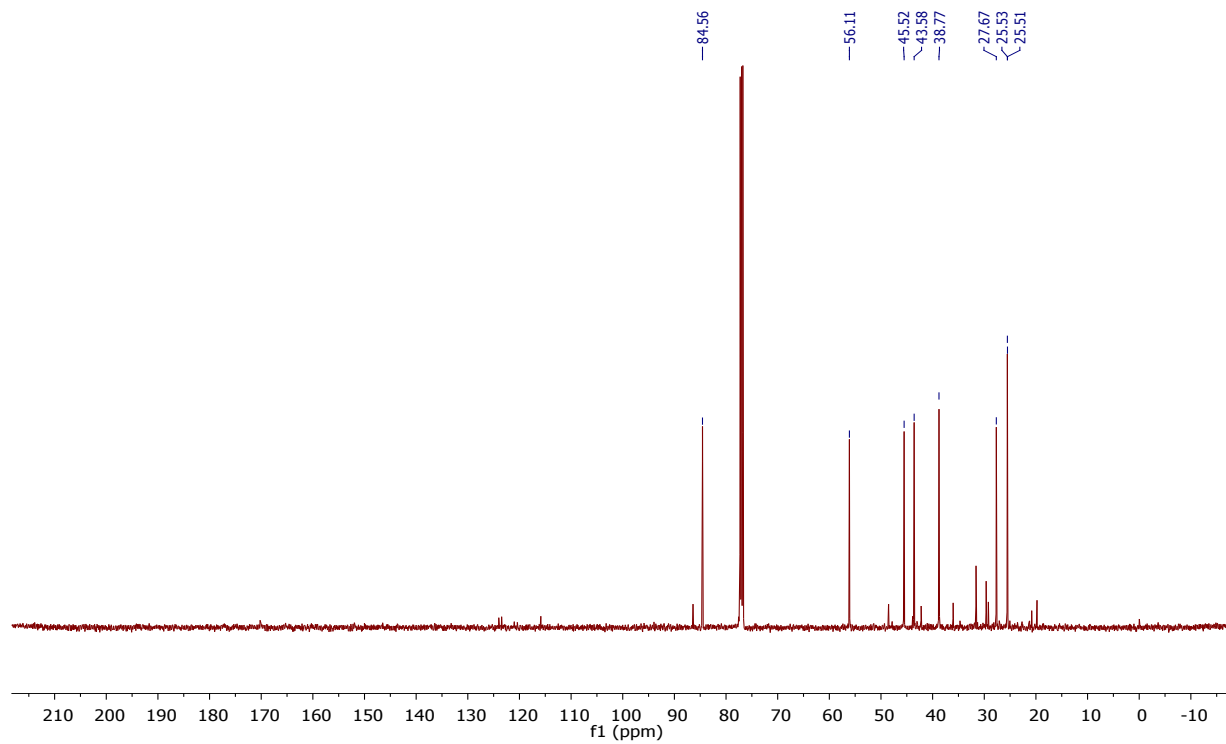

<sup>1</sup>H NMR Spectrum of compound **5j** in CDCl<sub>3</sub>

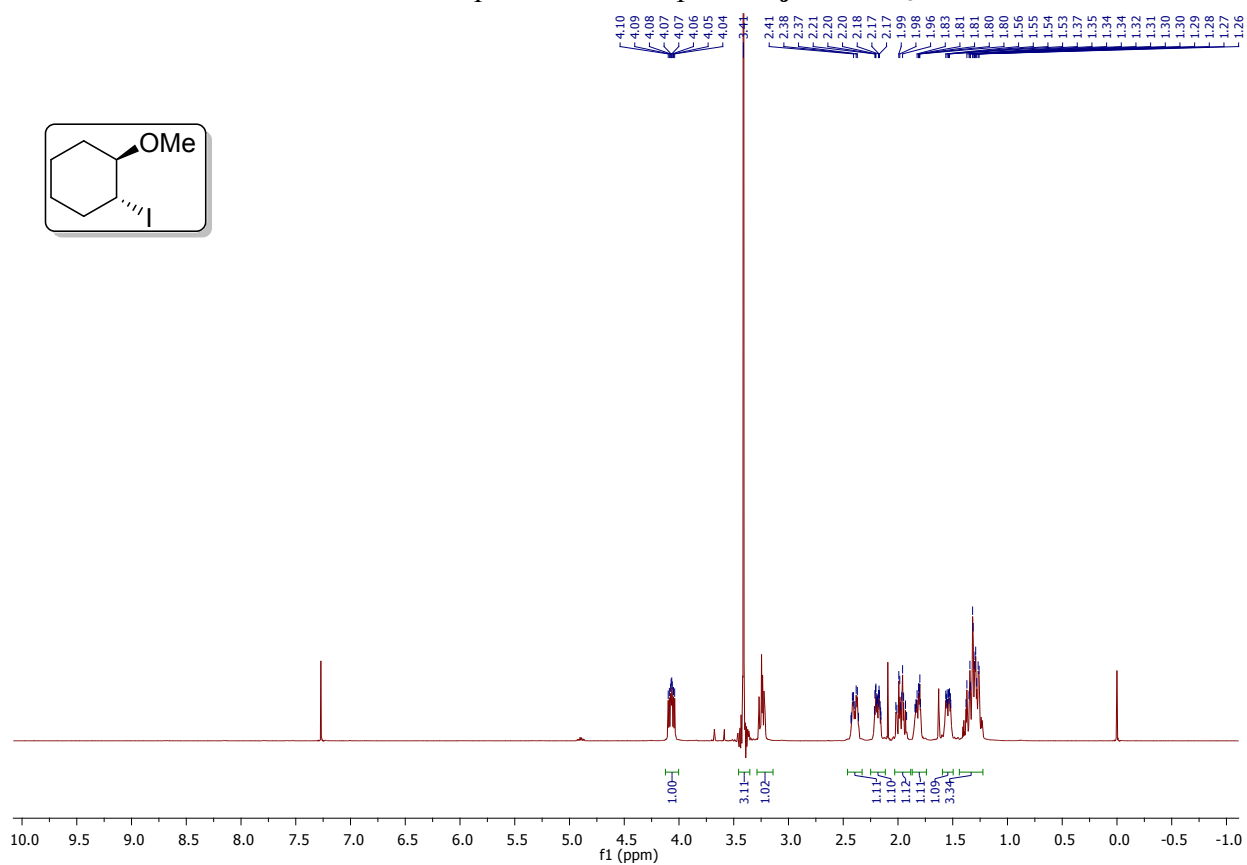

<sup>13</sup>C NMR Spectrum of compound **5j** in CDCl<sub>3</sub>

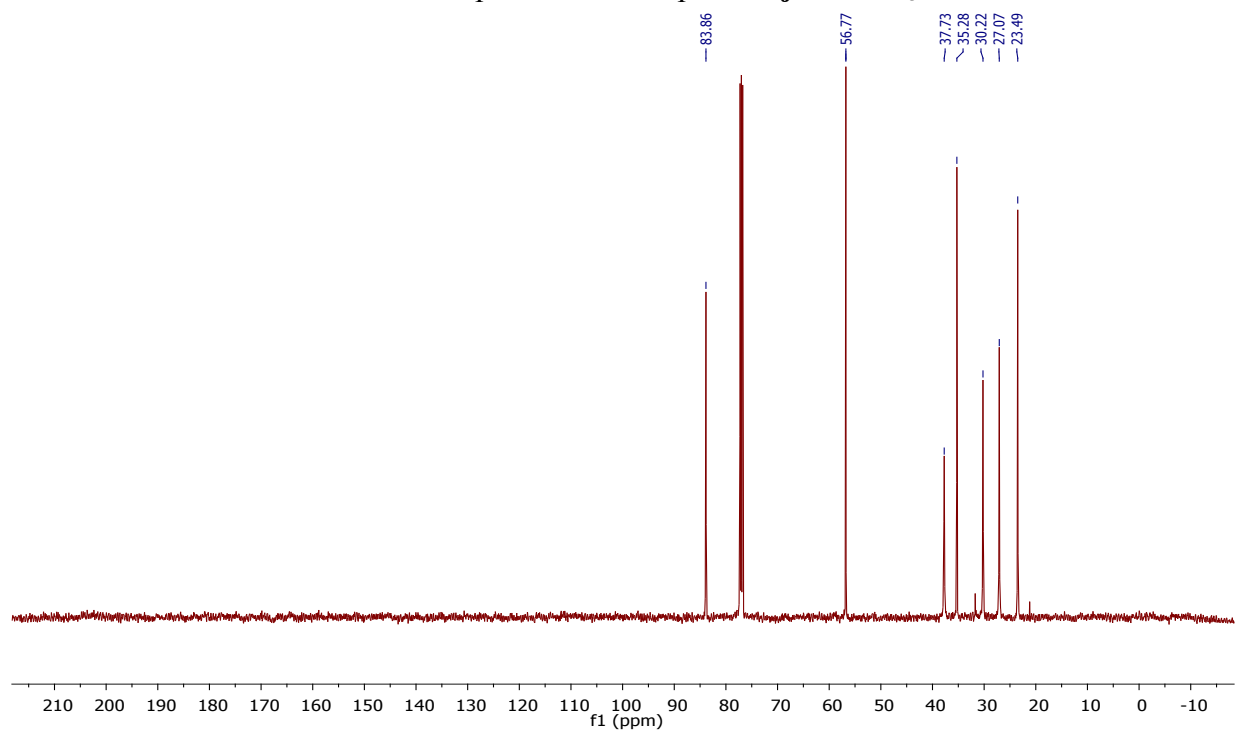

<sup>1</sup>H NMR Spectrum of compound **5k** in CDCl<sub>3</sub>

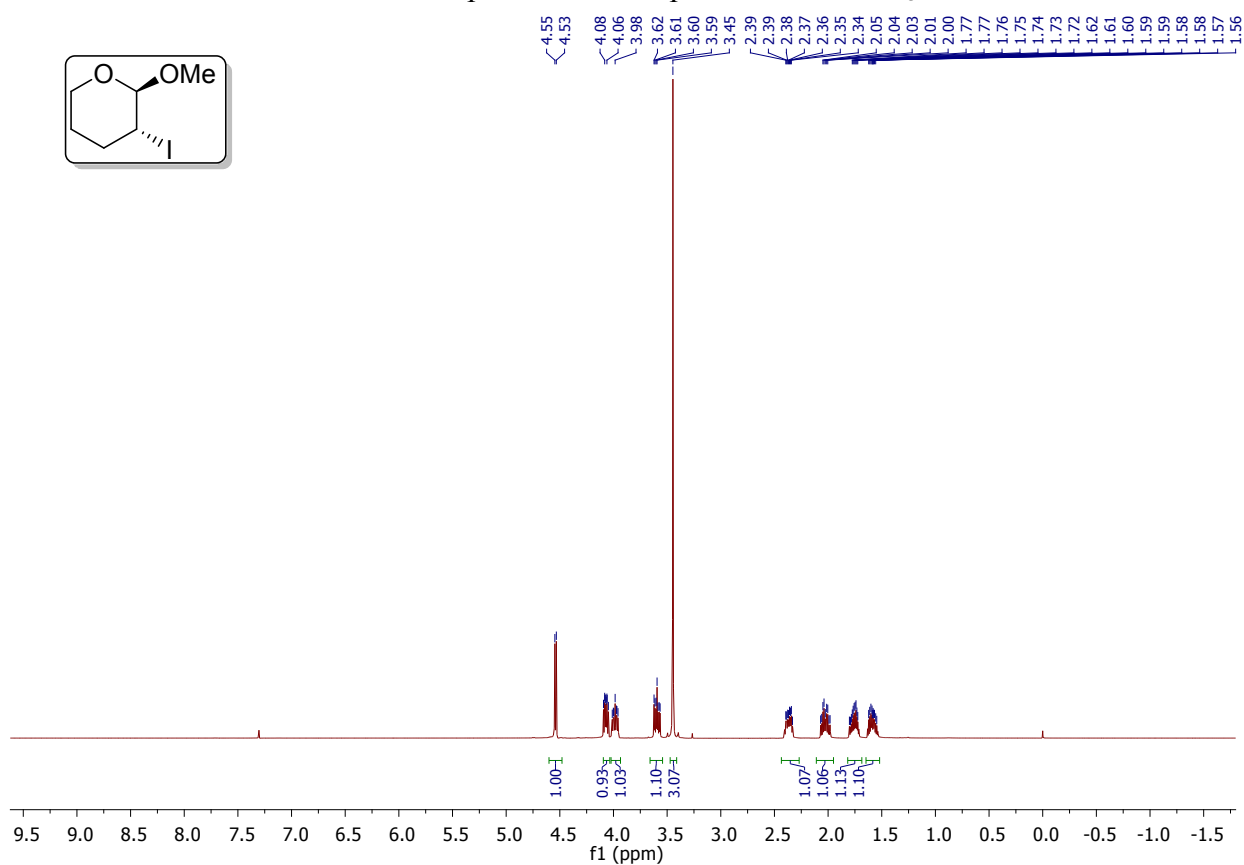

<sup>13</sup>C NMR Spectrum of compound **5k** in CDCl<sub>3</sub>

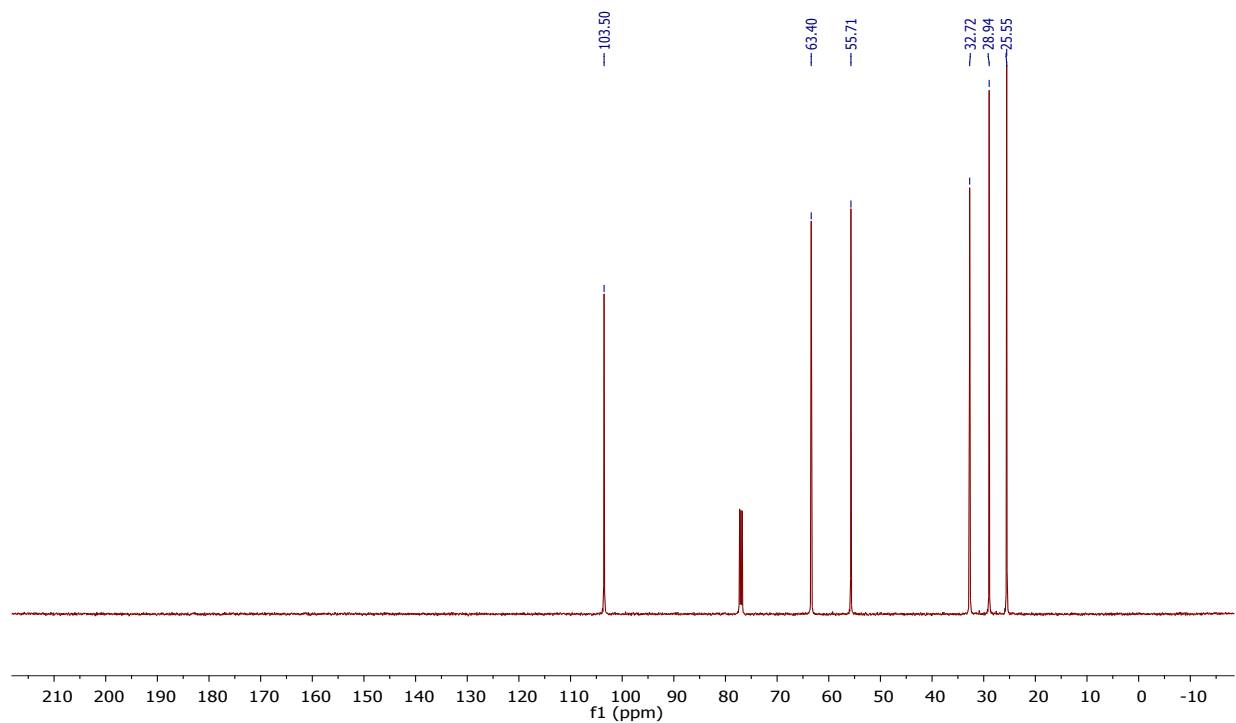



<sup>1</sup>H NMR Spectrum of compound **6a** in CDCl<sub>3</sub>

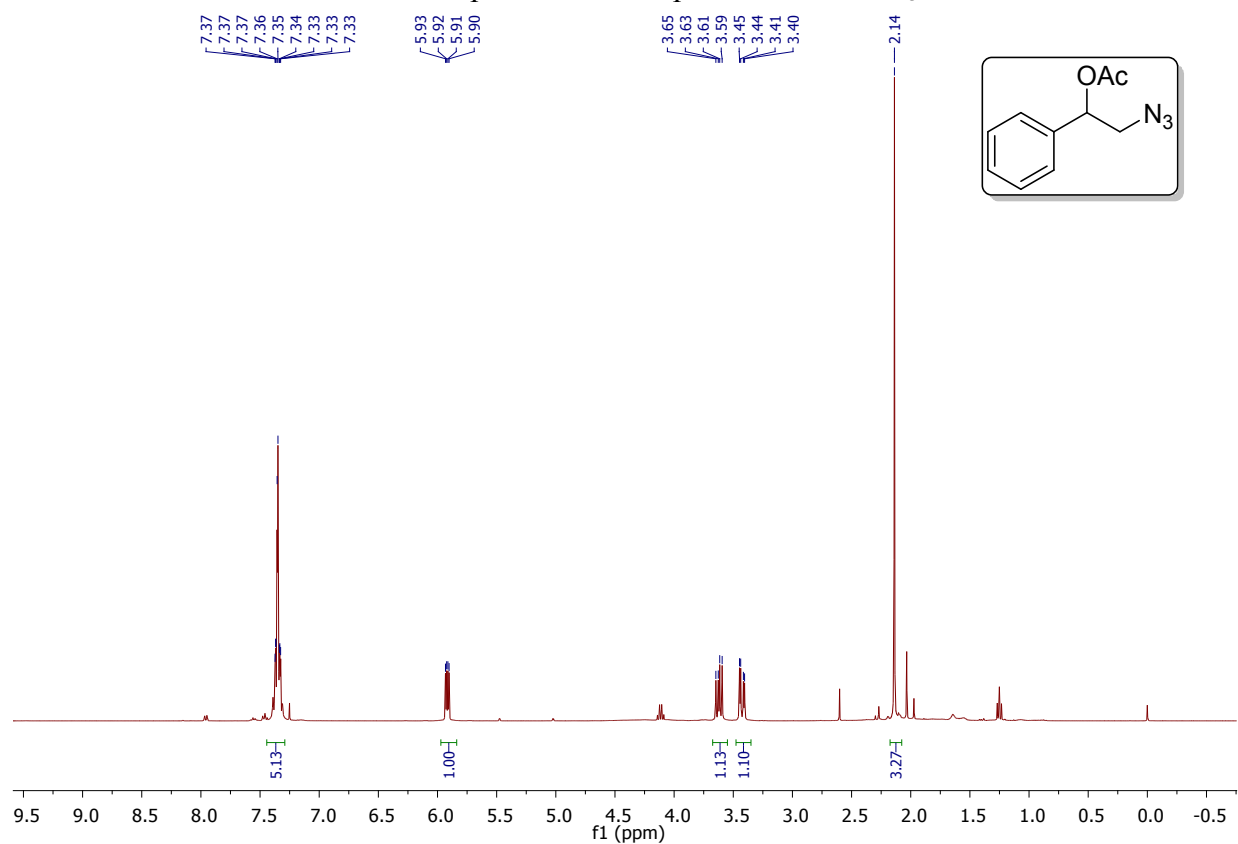

<sup>13</sup>C NMR Spectrum of compound **6a** in CDCl<sub>3</sub>

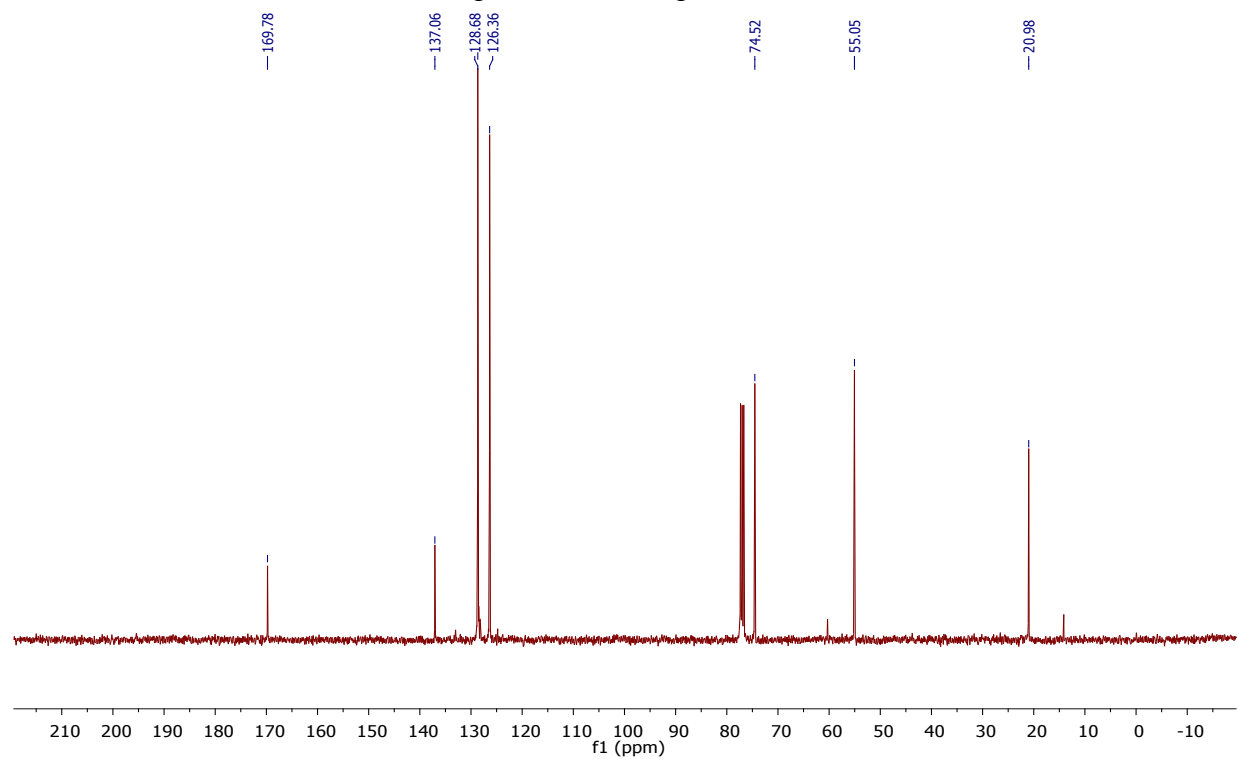

<sup>1</sup>H NMR Spectrum of compound **6b** in CDCl<sub>3</sub>

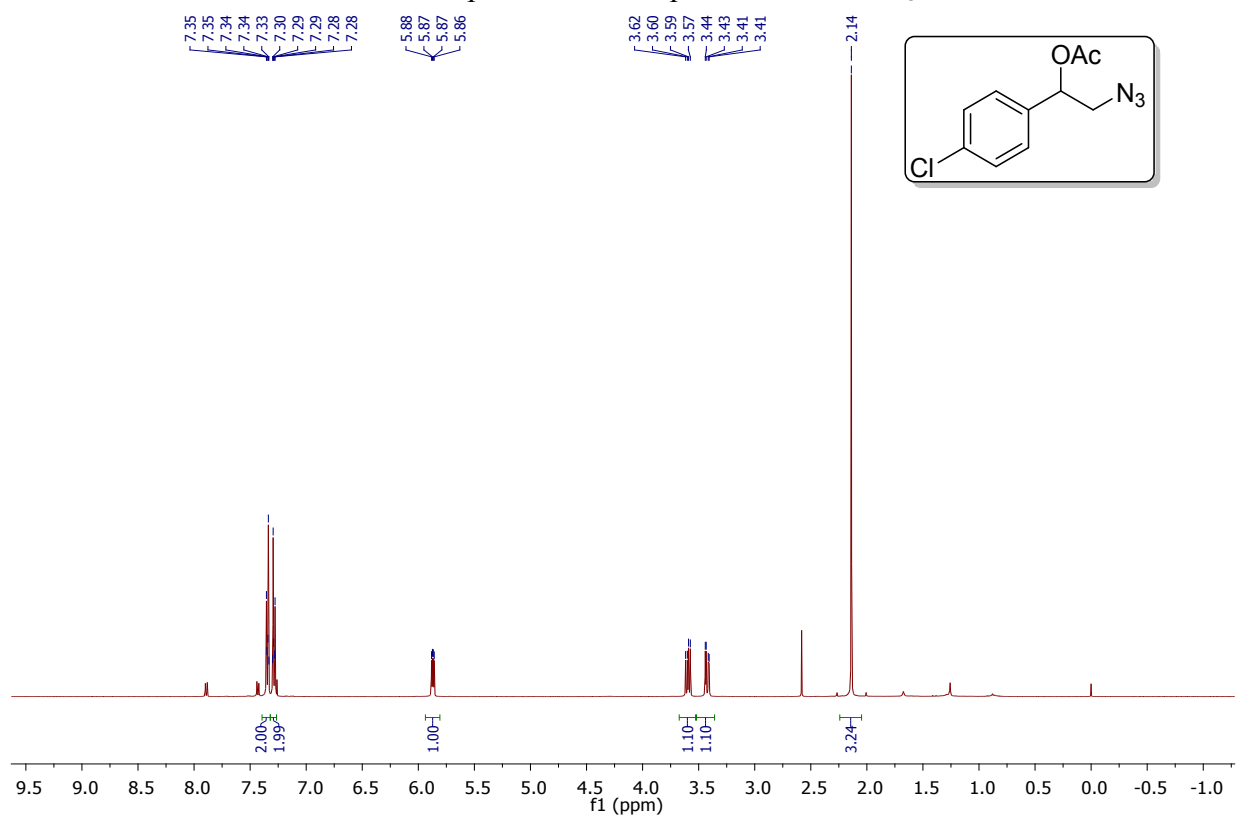

<sup>13</sup>C NMR Spectrum of compound **6b** in CDCl<sub>3</sub>

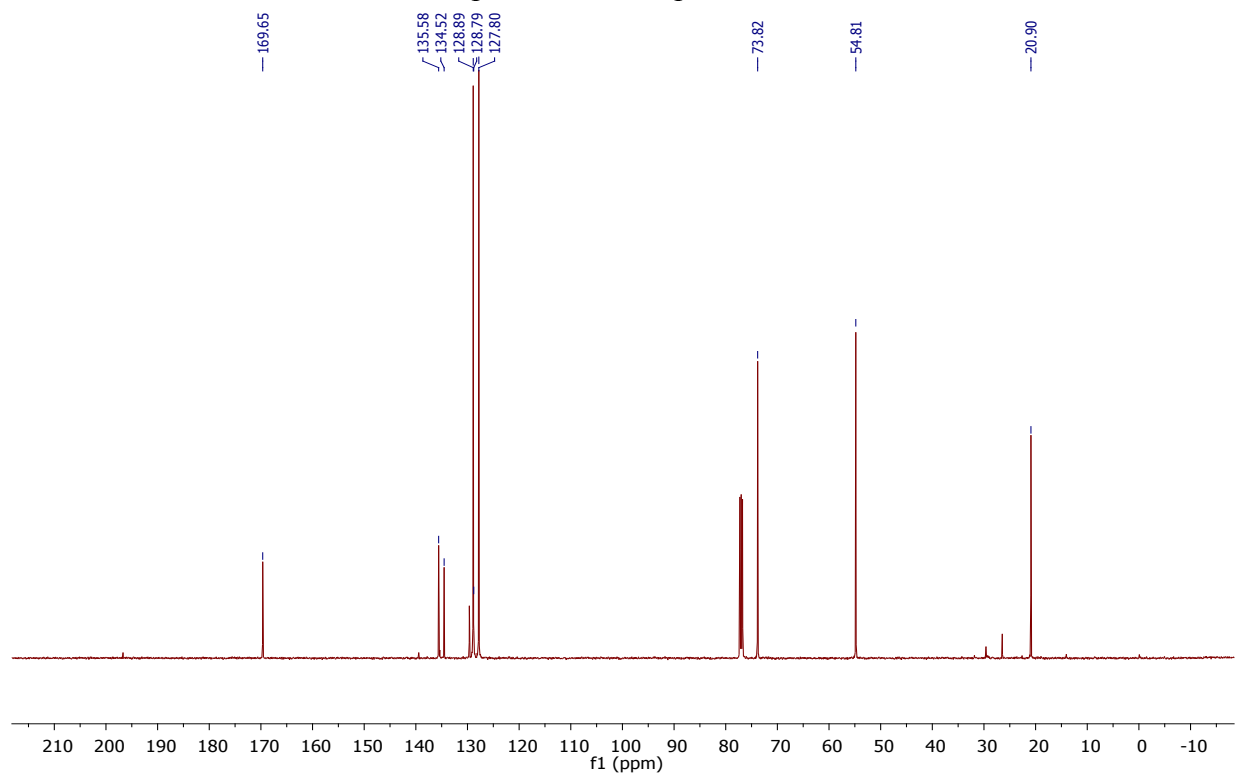

<sup>1</sup>H NMR Spectrum of compound **6c** in CDCl<sub>3</sub>

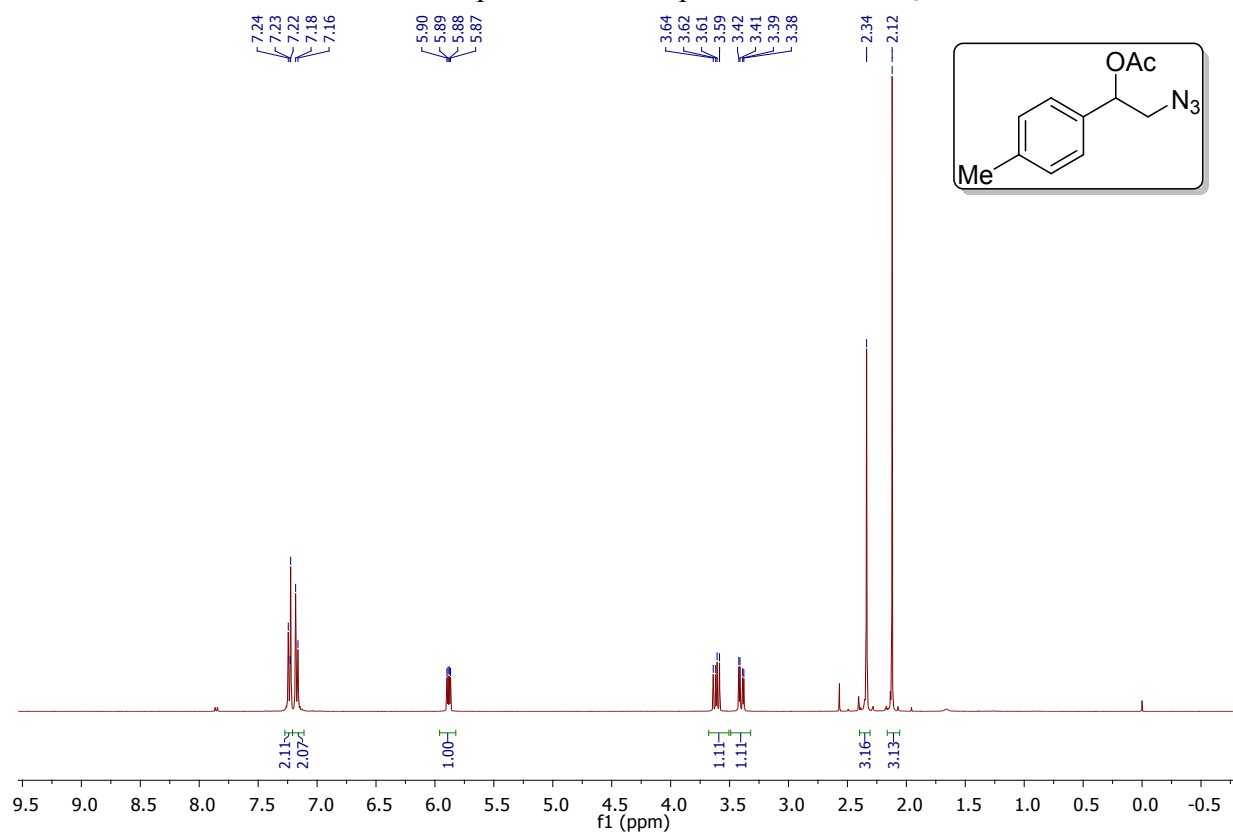

<sup>13</sup>C NMR Spectrum of compound **6c** in CDCl<sub>3</sub>

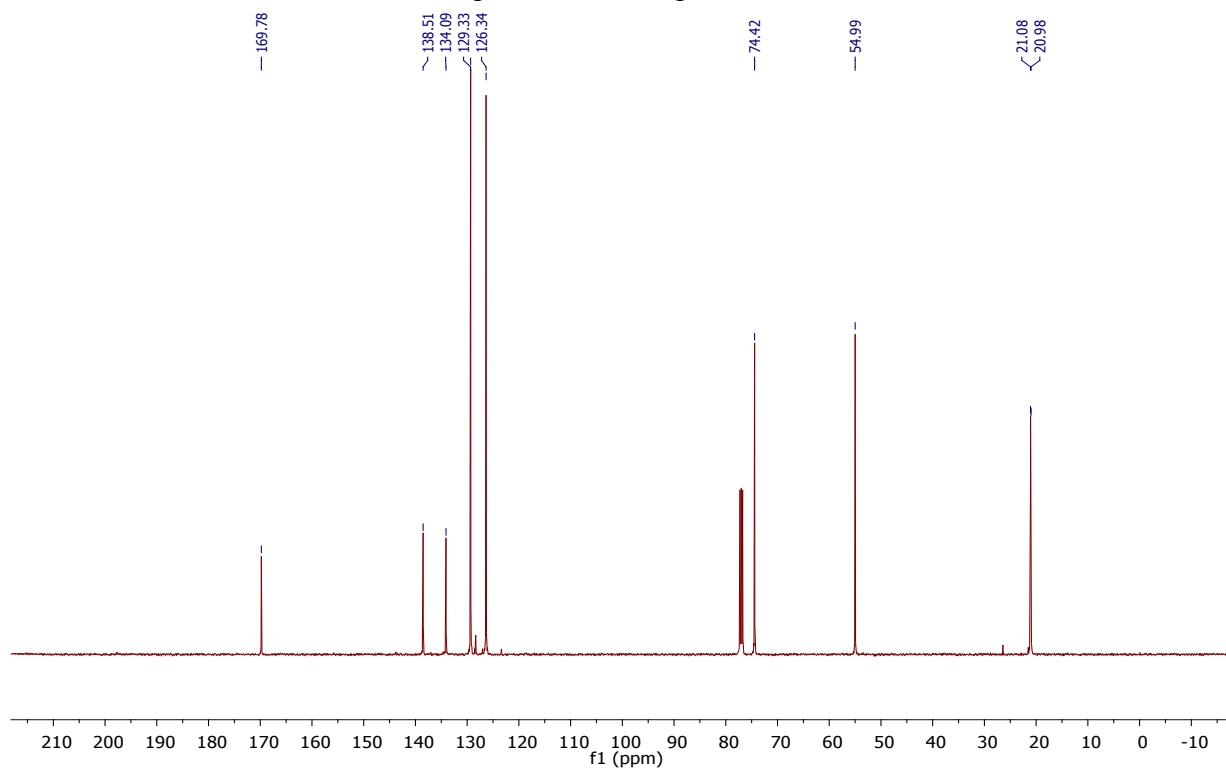

<sup>1</sup>H NMR Spectrum of compound **6d** in CDCl<sub>3</sub>

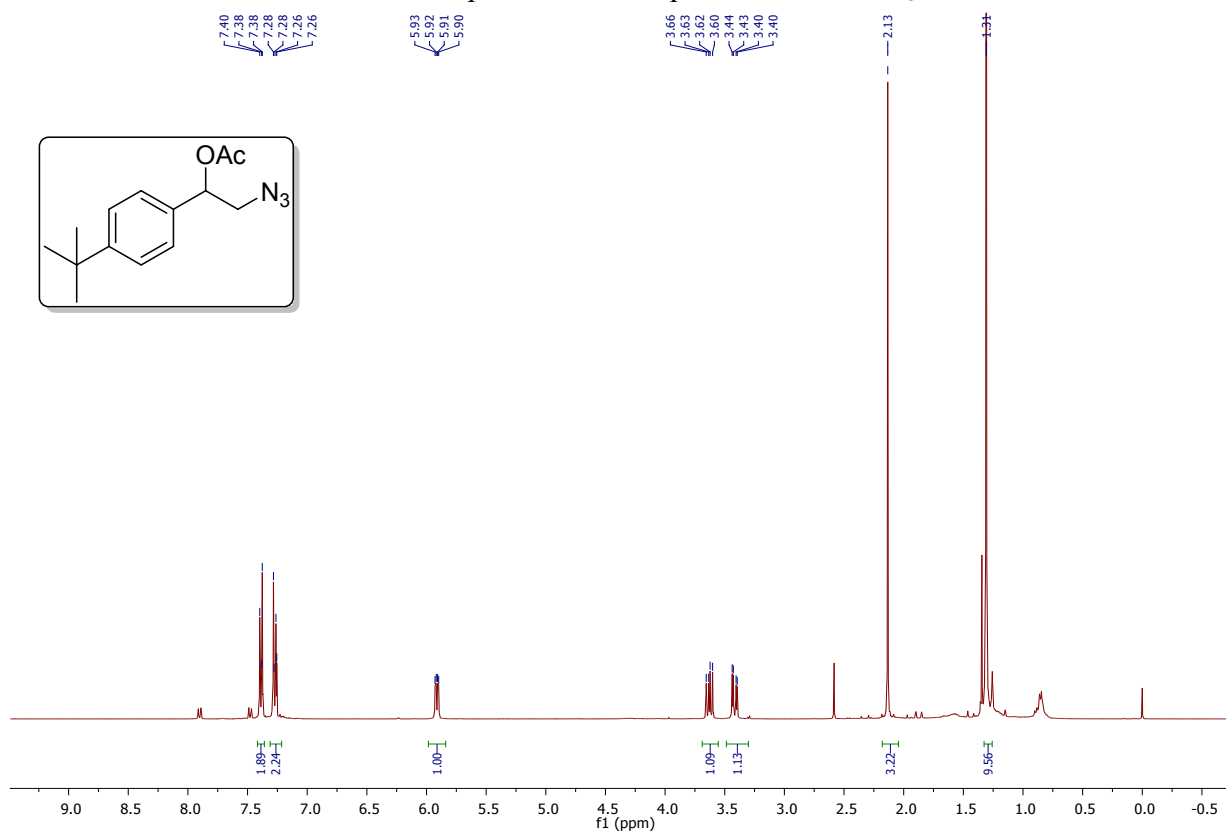

<sup>13</sup>C NMR Spectrum of compound **6d** in CDCl<sub>3</sub>

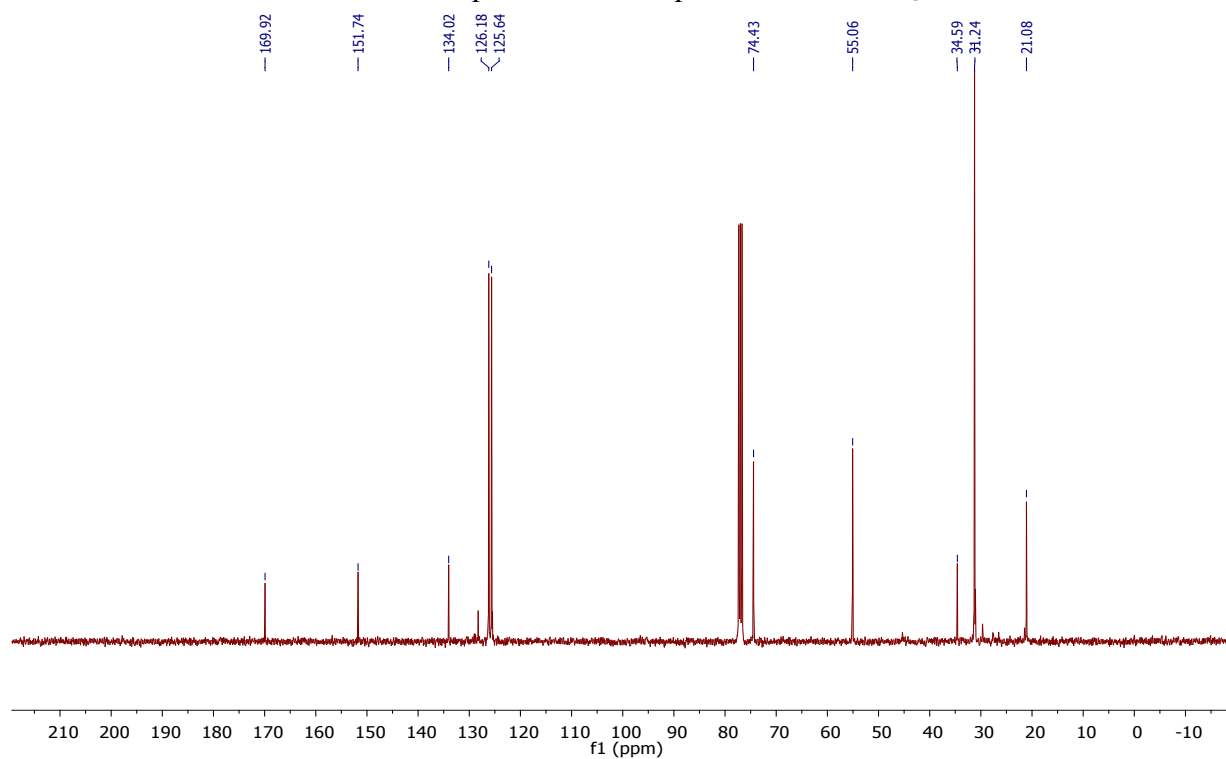

<sup>1</sup>H NMR Spectrum of compound **6e** in CDCl<sub>3</sub>

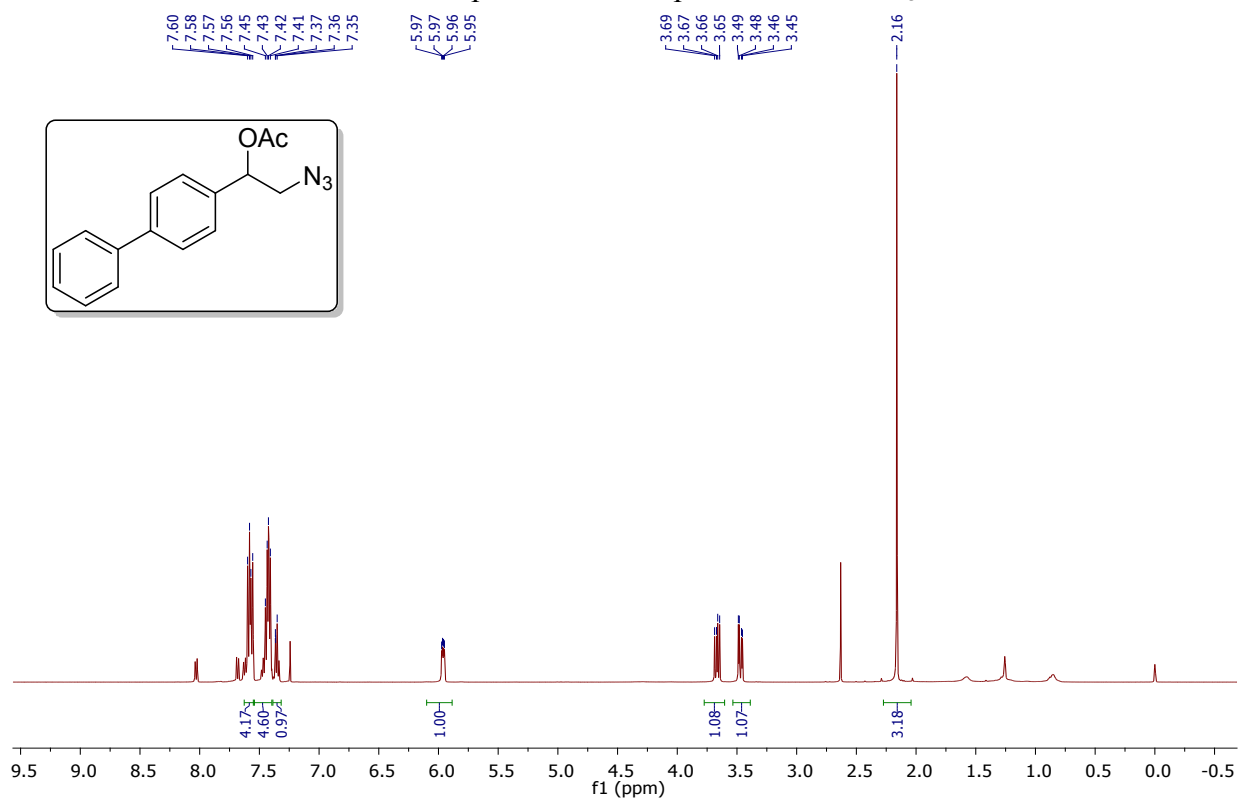

<sup>13</sup>C NMR Spectrum of compound **6e** in CDCl<sub>3</sub>

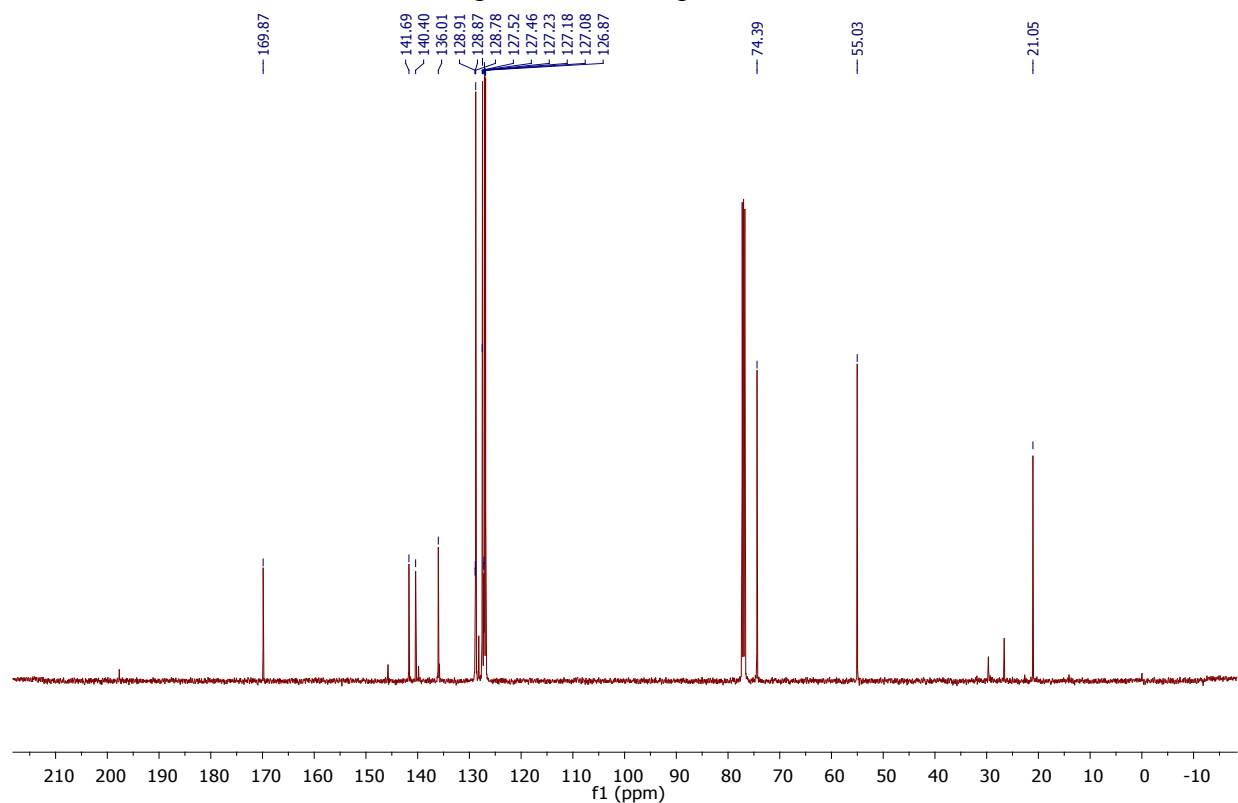

<sup>1</sup>H NMR Spectrum of compound **6f** in CDCl<sub>3</sub>

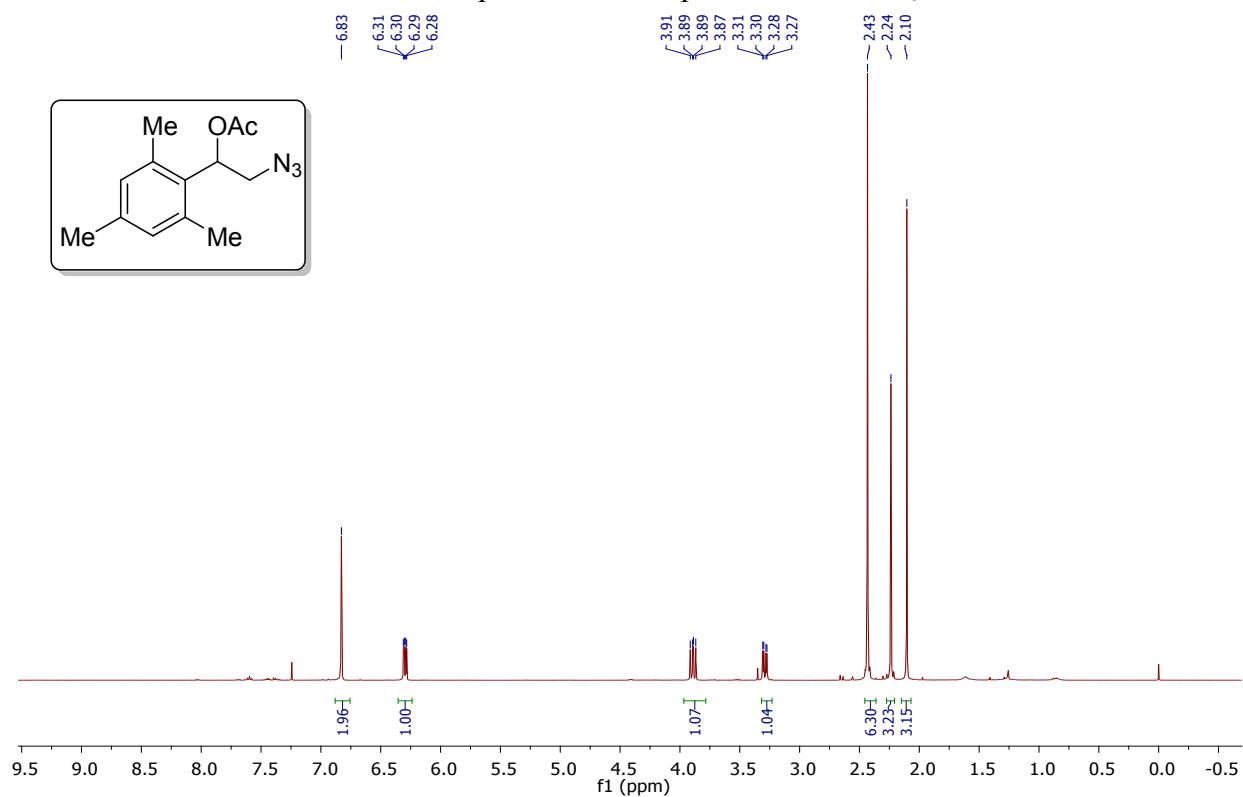

<sup>13</sup>C NMR Spectrum of compound **6f** in CDCl<sub>3</sub>

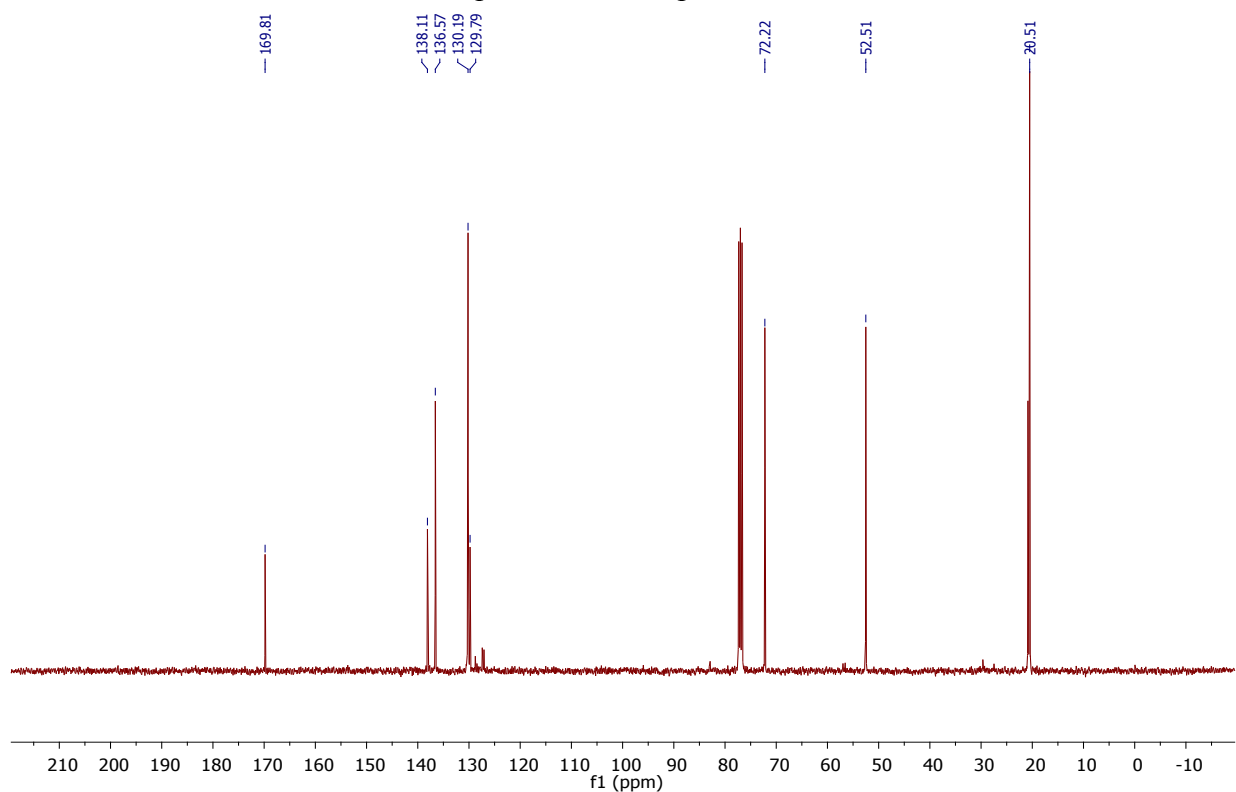

<sup>1</sup>H NMR Spectrum of compound **6g** in CDCl<sub>3</sub>

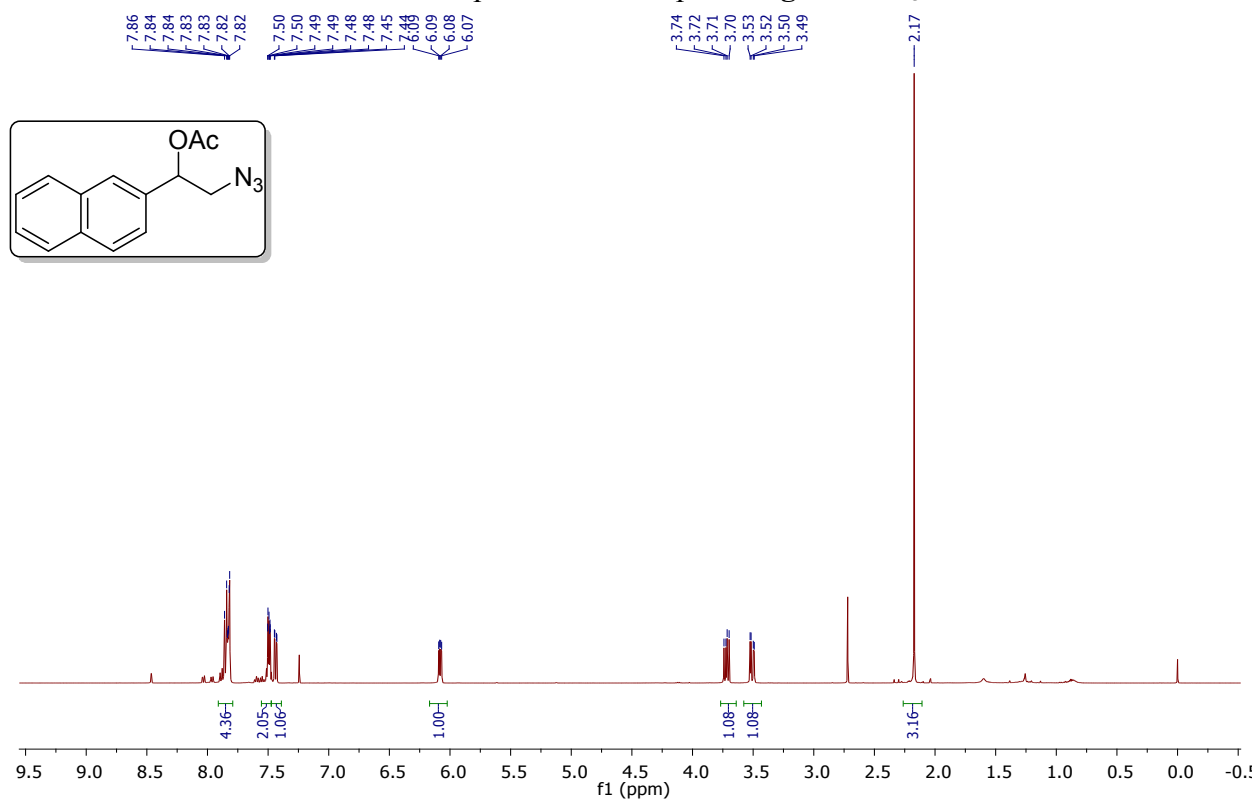

<sup>13</sup>C NMR Spectrum of compound **6g** in CDCl<sub>3</sub>

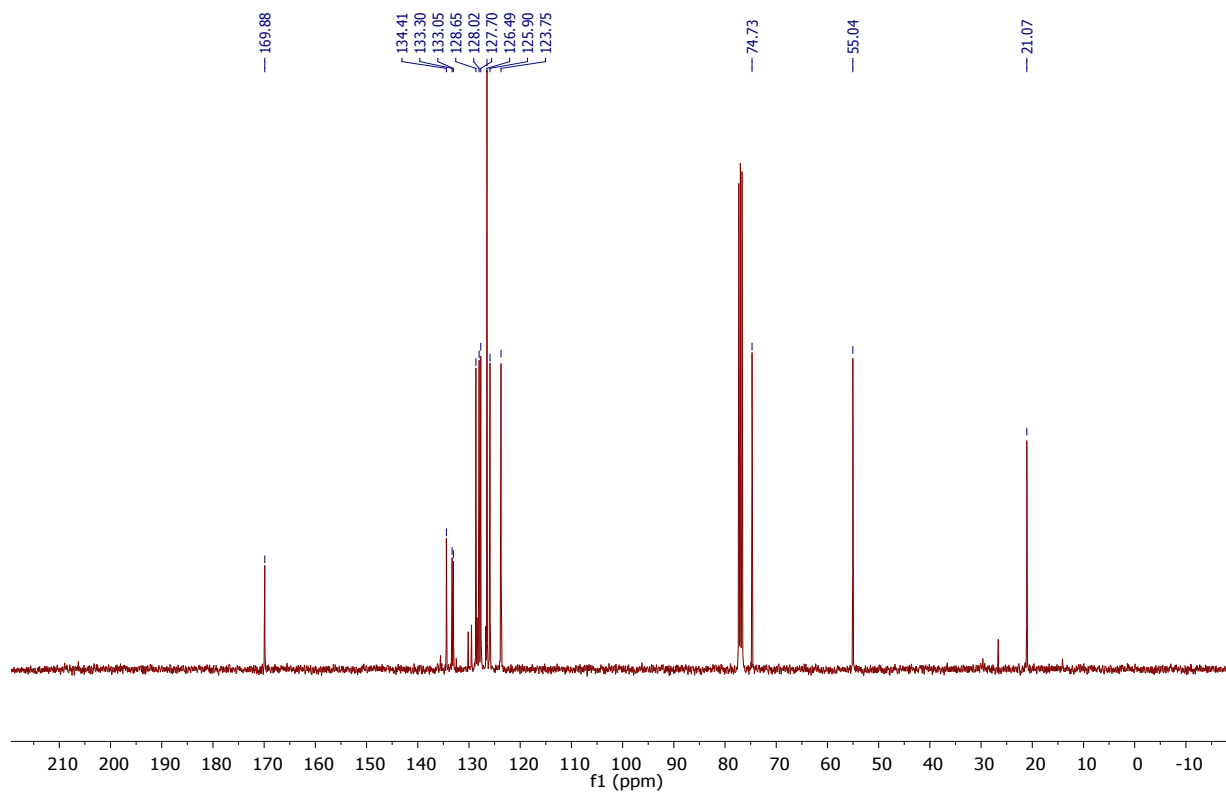

<sup>1</sup>H NMR Spectrum of compound **7a** in CDCl<sub>3</sub>

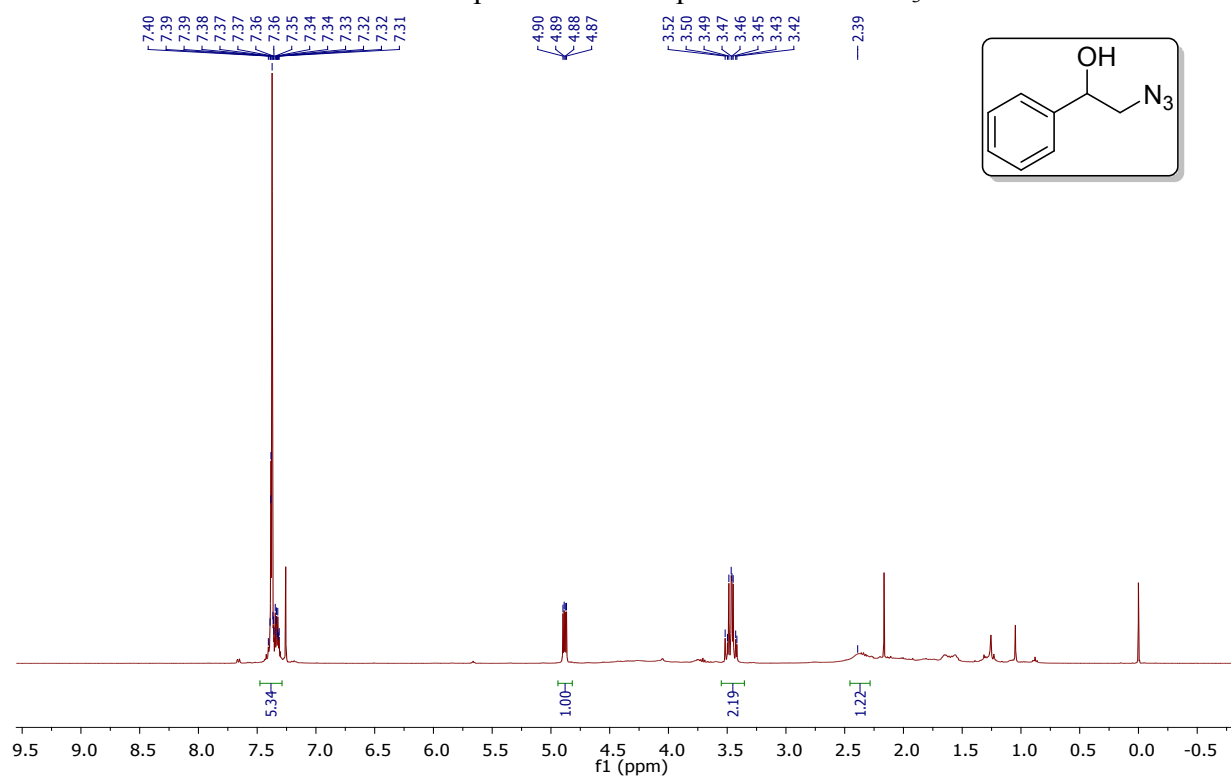

<sup>13</sup>C NMR Spectrum of compound **7a** in CDCl<sub>3</sub>

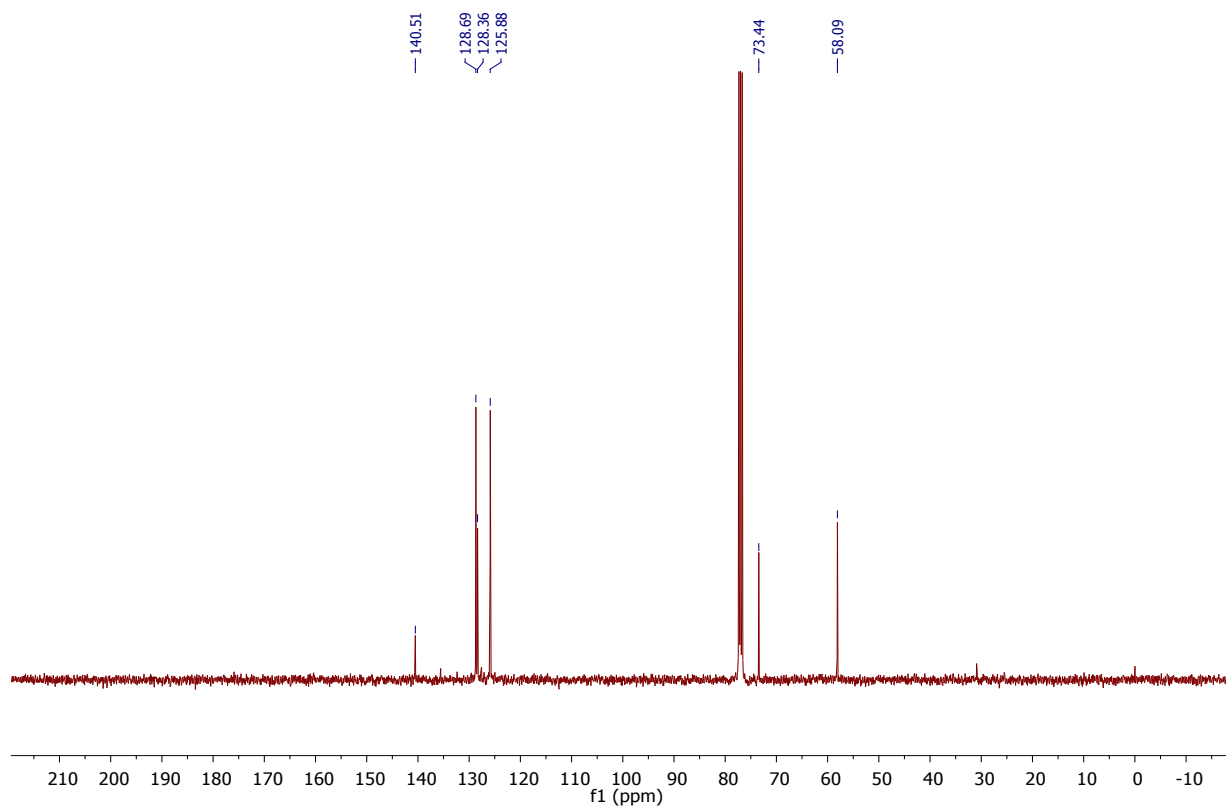



<sup>1</sup>H NMR Spectrum of compound **8a** in CDCl<sub>3</sub>

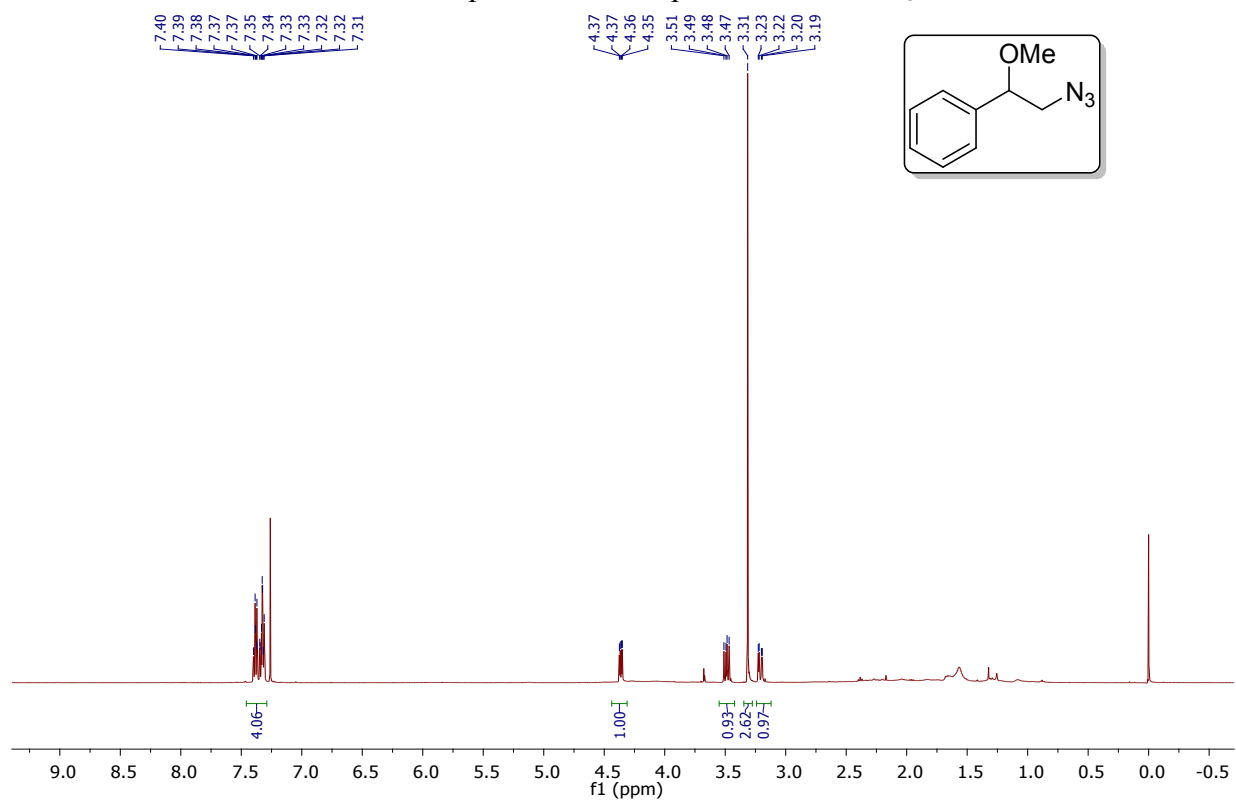

<sup>13</sup>C NMR Spectrum of compound **8a** in CDCl<sub>3</sub>

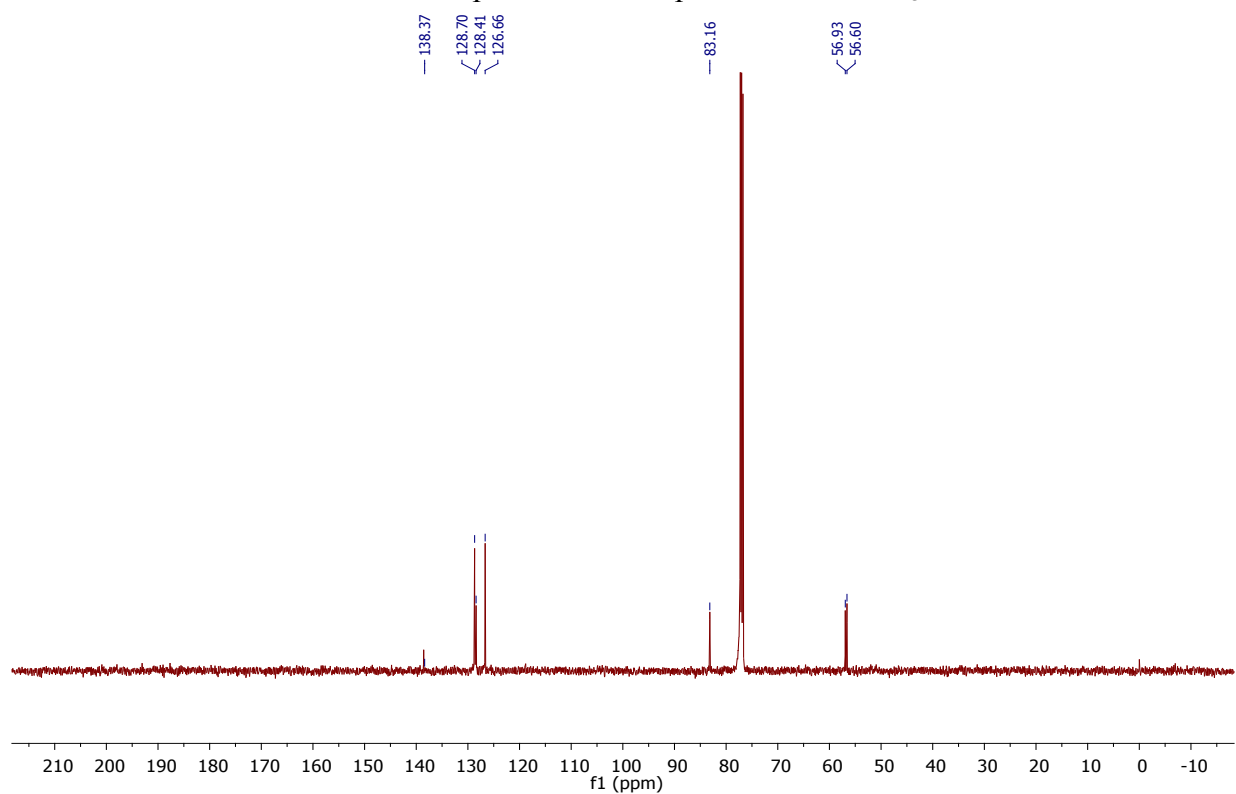

<sup>1</sup>H NMR Spectrum of compound **8b** in CDCl<sub>3</sub>

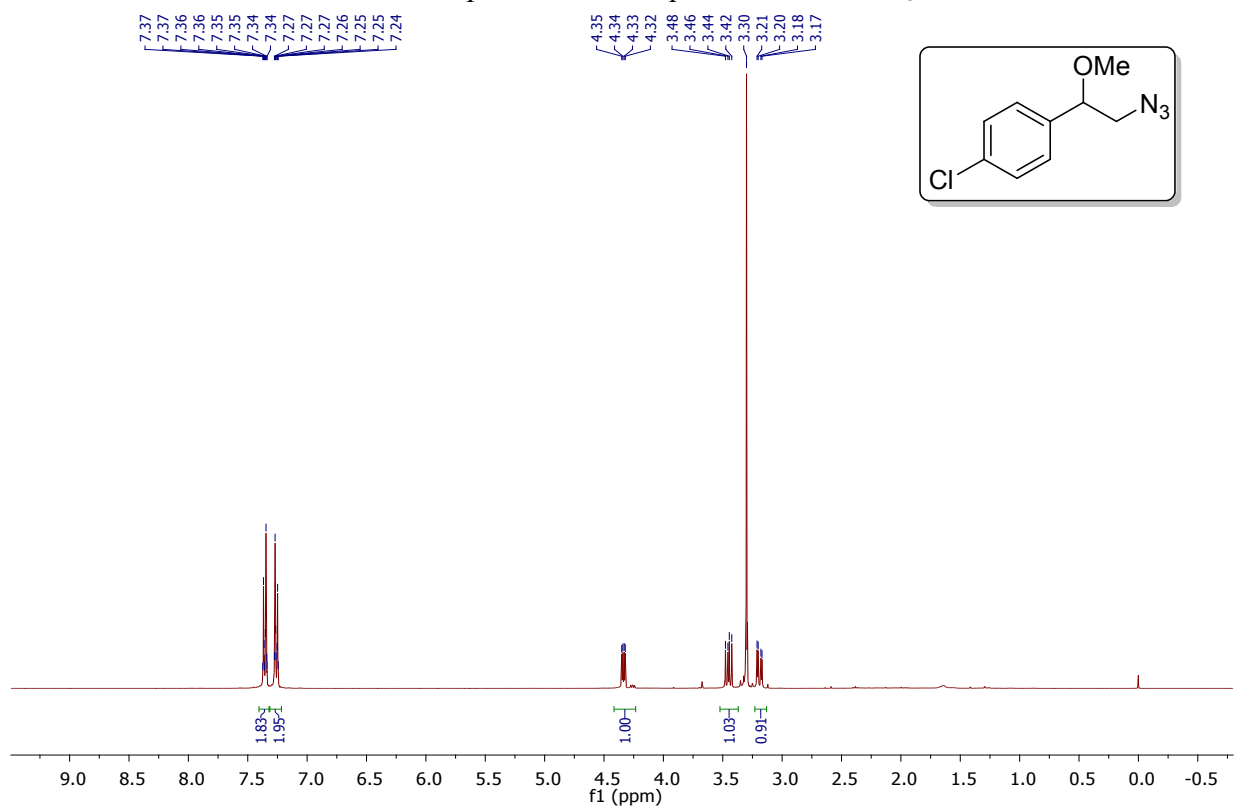

<sup>13</sup>C NMR Spectrum of compound **8b** in CDCl<sub>3</sub>

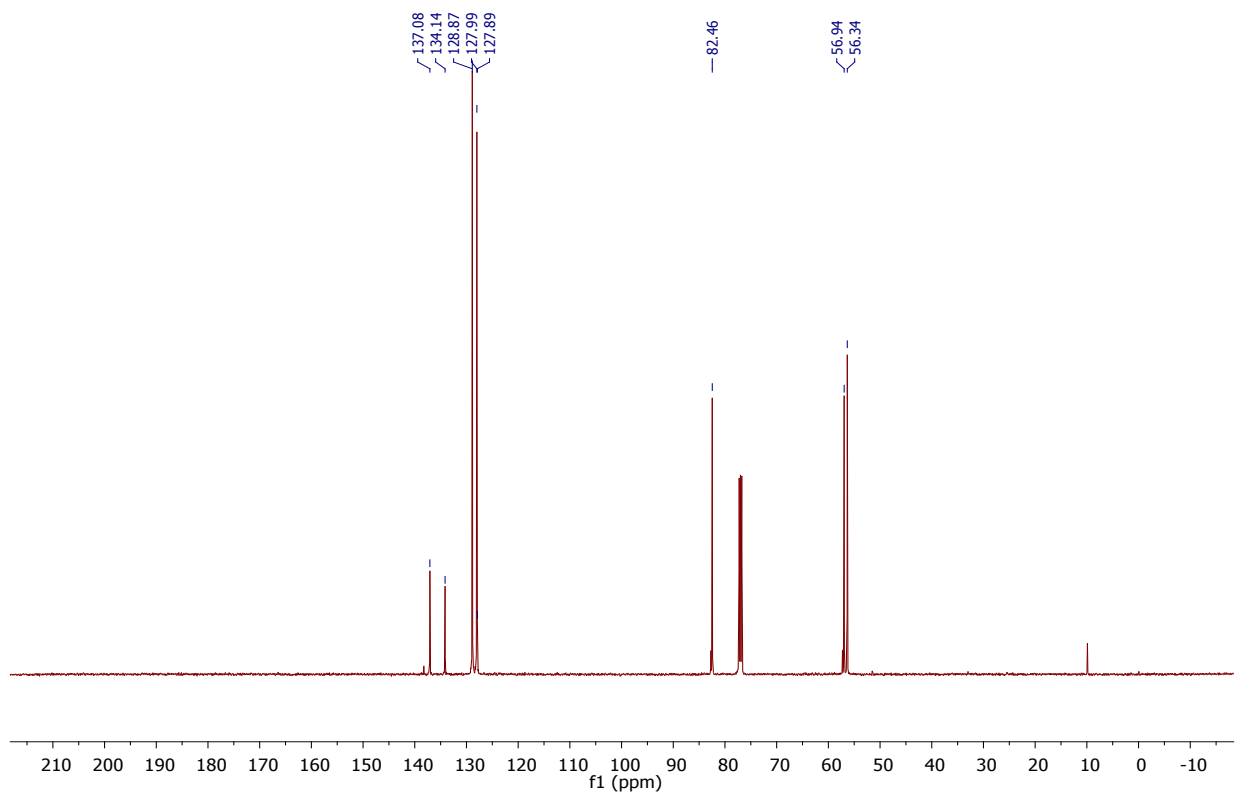

<sup>1</sup>H NMR Spectrum of compound **8c** in CDCl<sub>3</sub>

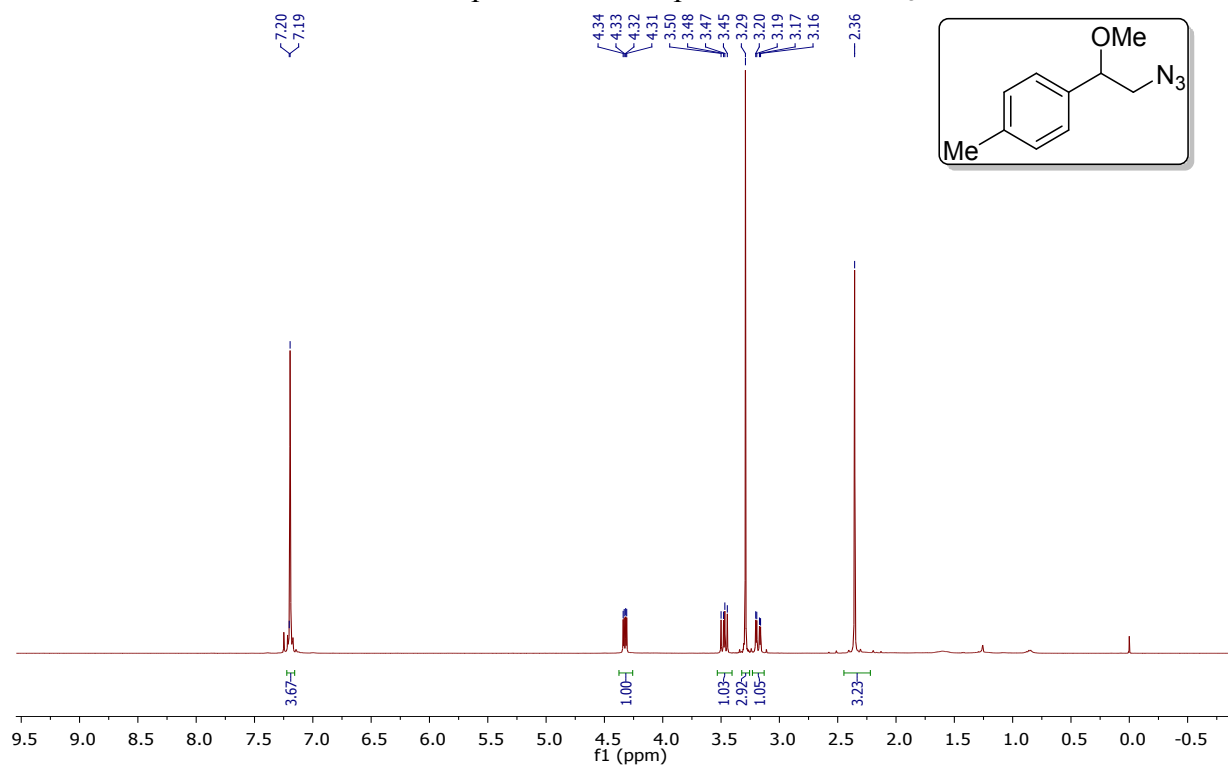

<sup>13</sup>C NMR Spectrum of compound **8c** in CDCl<sub>3</sub>

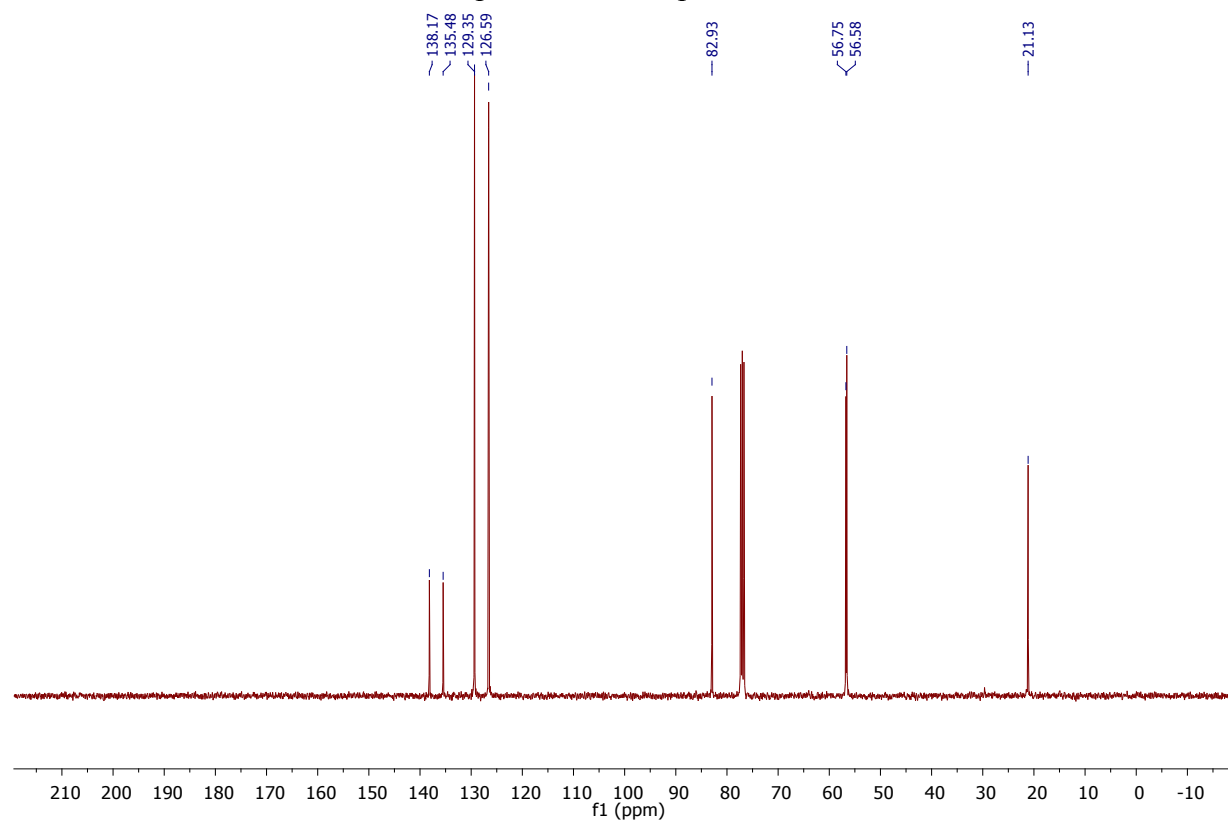

<sup>1</sup>H NMR Spectrum of compound **8d** in CDCl<sub>3</sub>

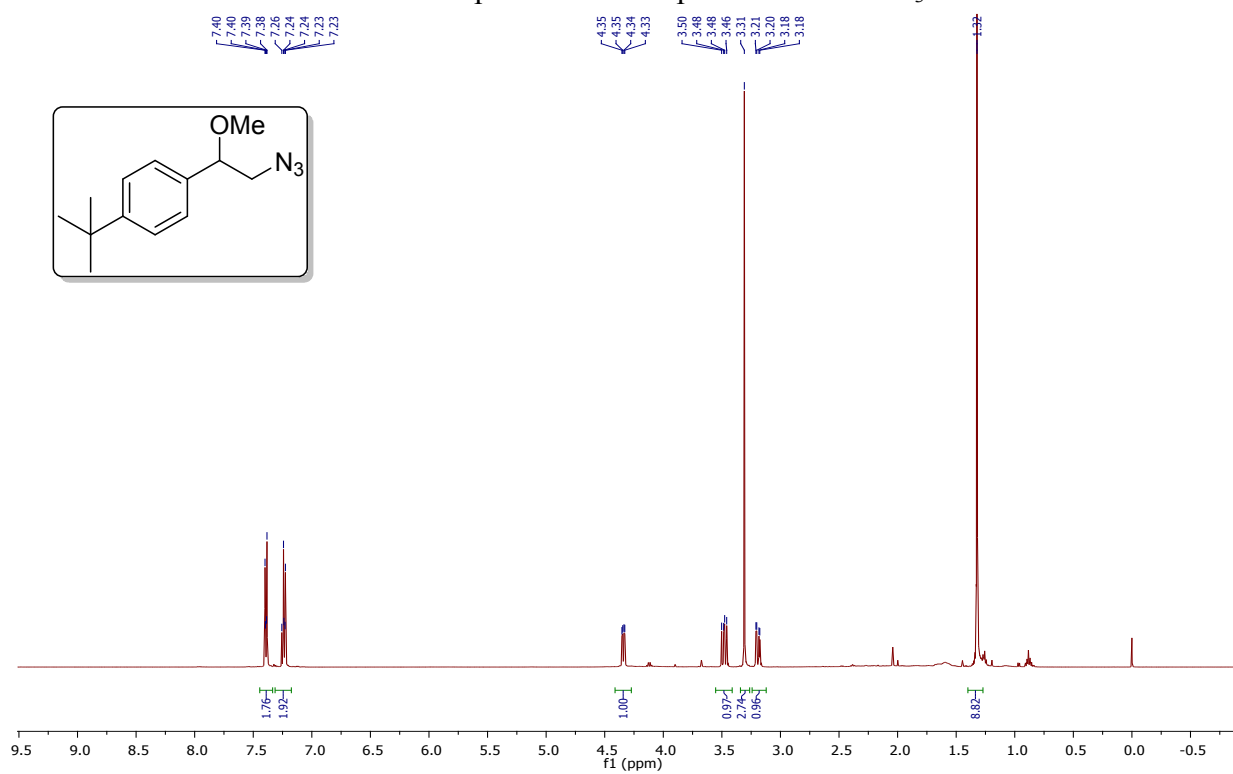

<sup>13</sup>C NMR Spectrum of compound **8d** in CDCl<sub>3</sub>

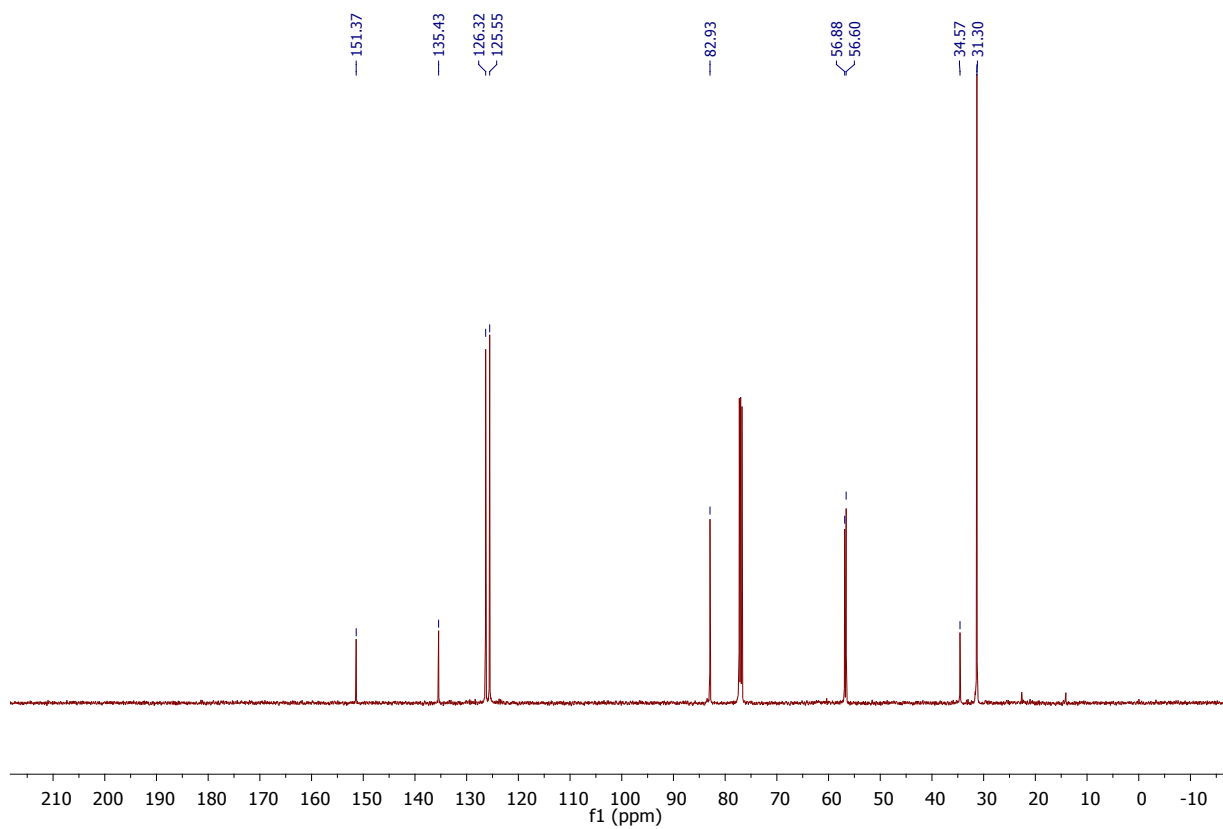

<sup>1</sup>H NMR Spectrum of compound **8e** in CDCl<sub>3</sub>

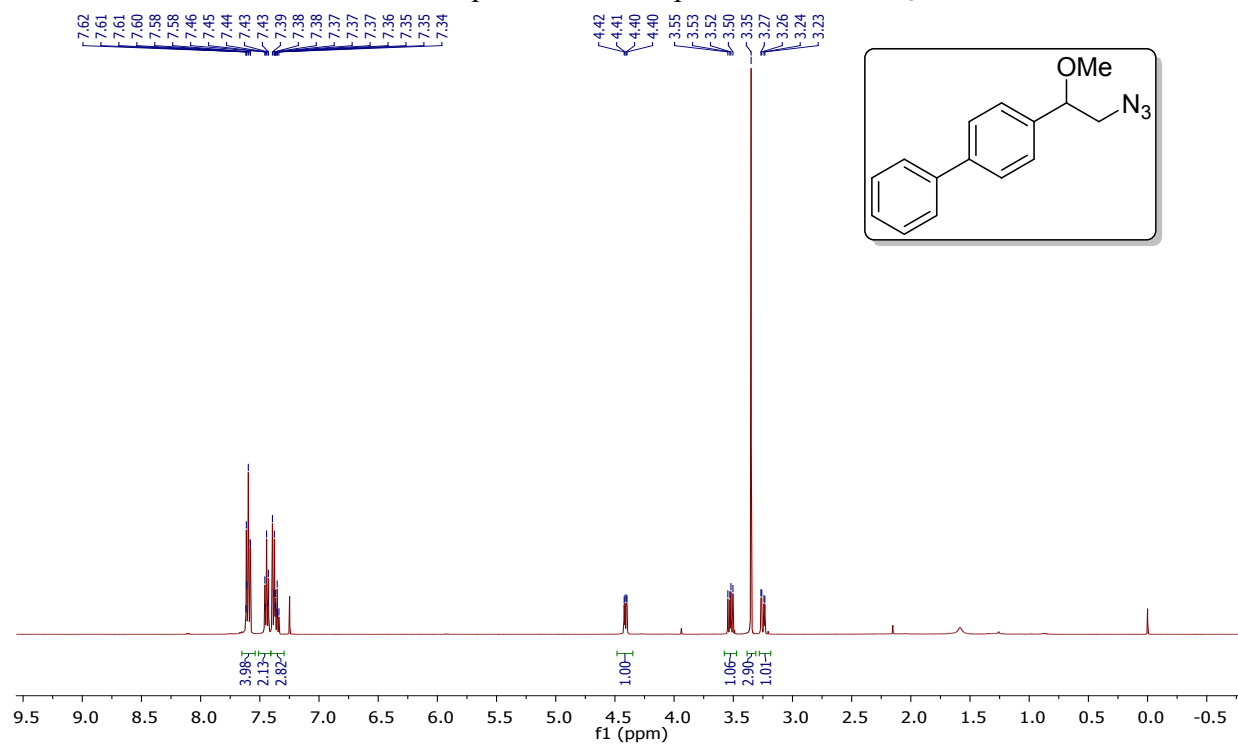

<sup>13</sup>C NMR Spectrum of compound **8e** in CDCl<sub>3</sub>

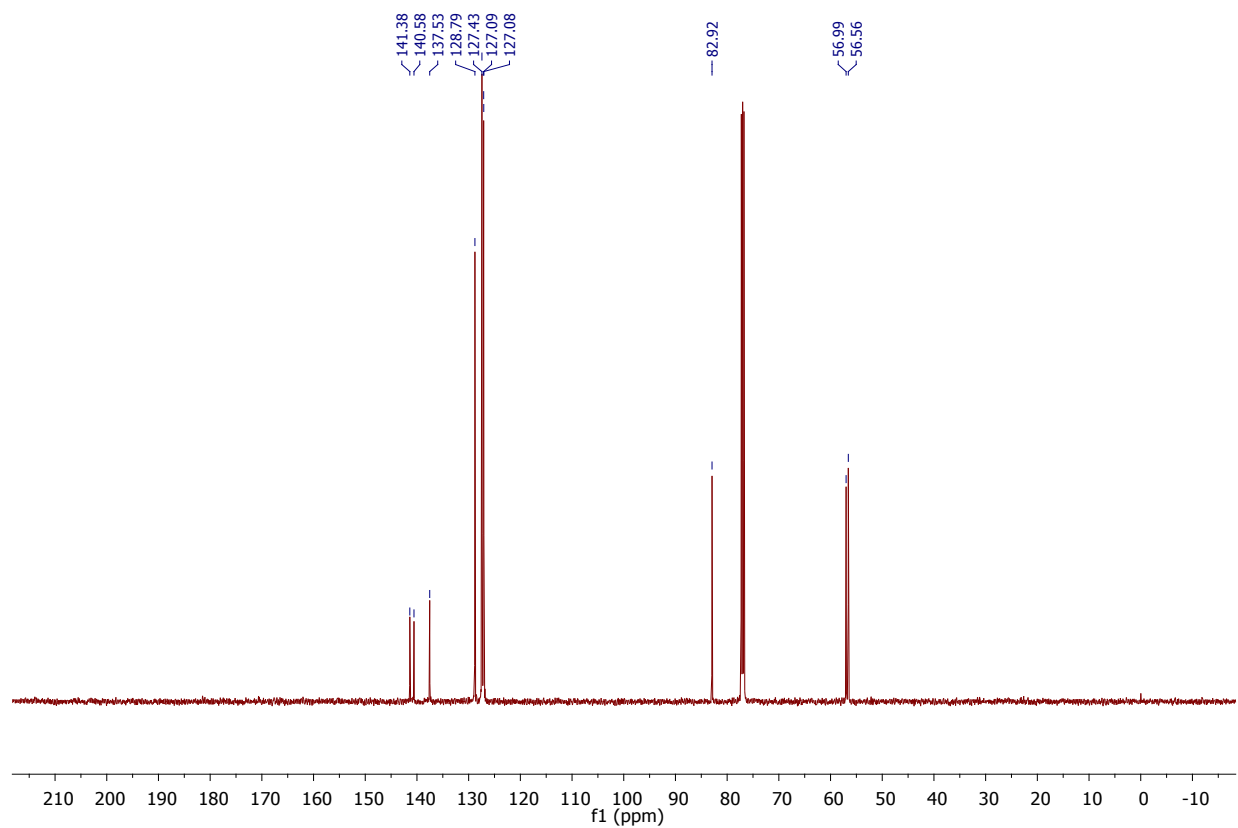

<sup>1</sup>H NMR Spectrum of compound **8f** in CDCl<sub>3</sub>

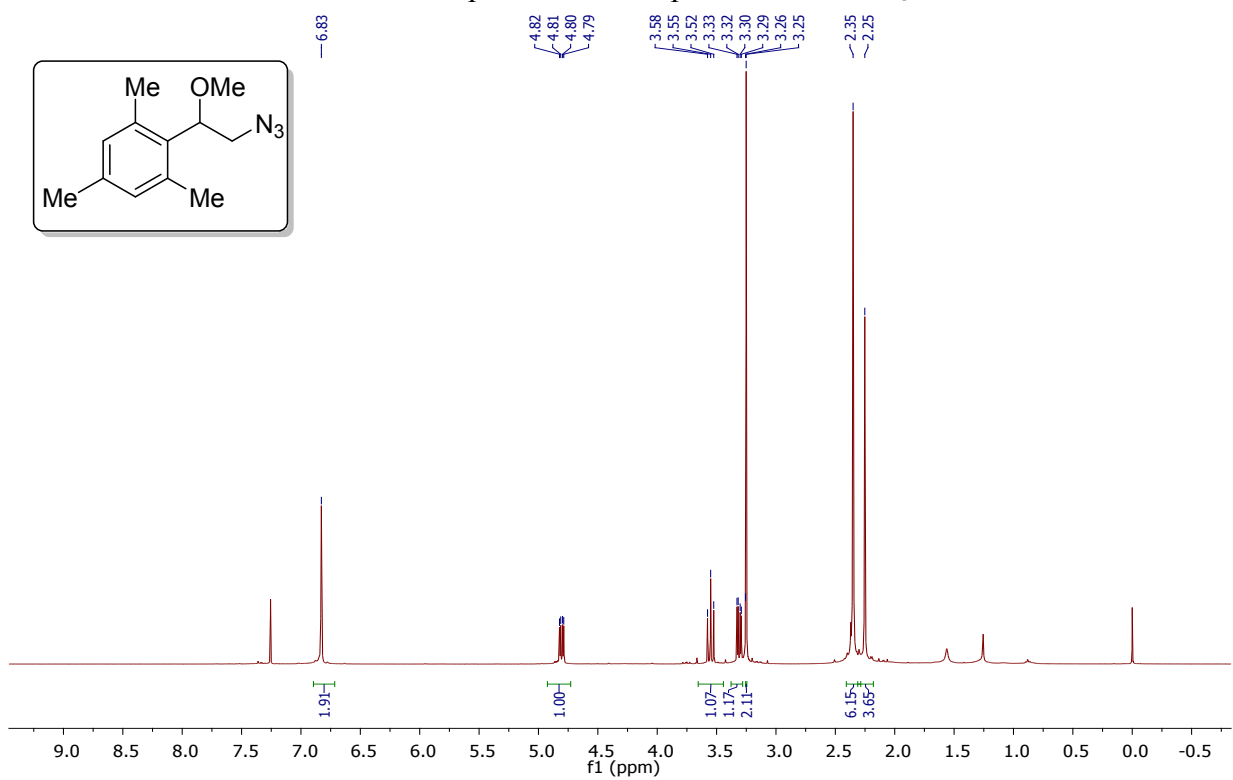

<sup>13</sup>C NMR Spectrum of compound **8f** in CDCl<sub>3</sub>

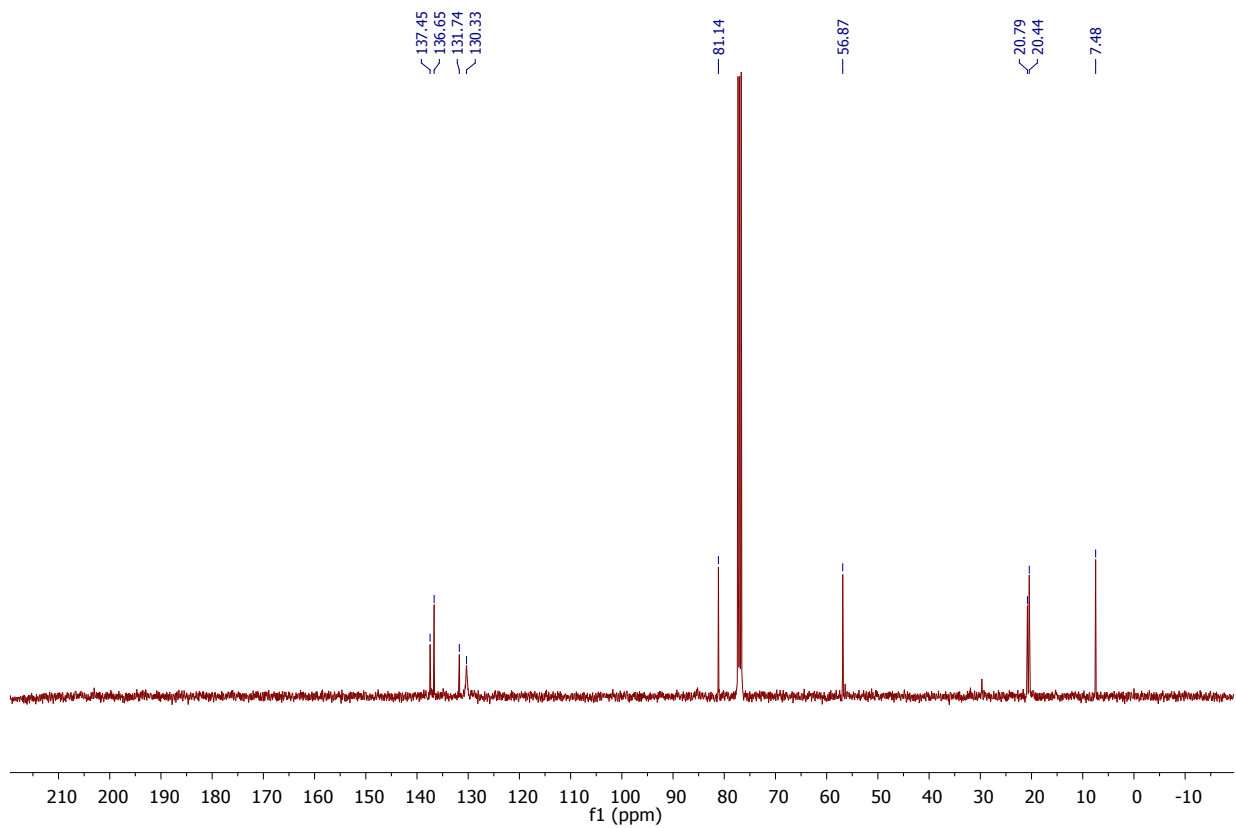

<sup>1</sup>H NMR Spectrum of compound **8g** in CDCl<sub>3</sub>

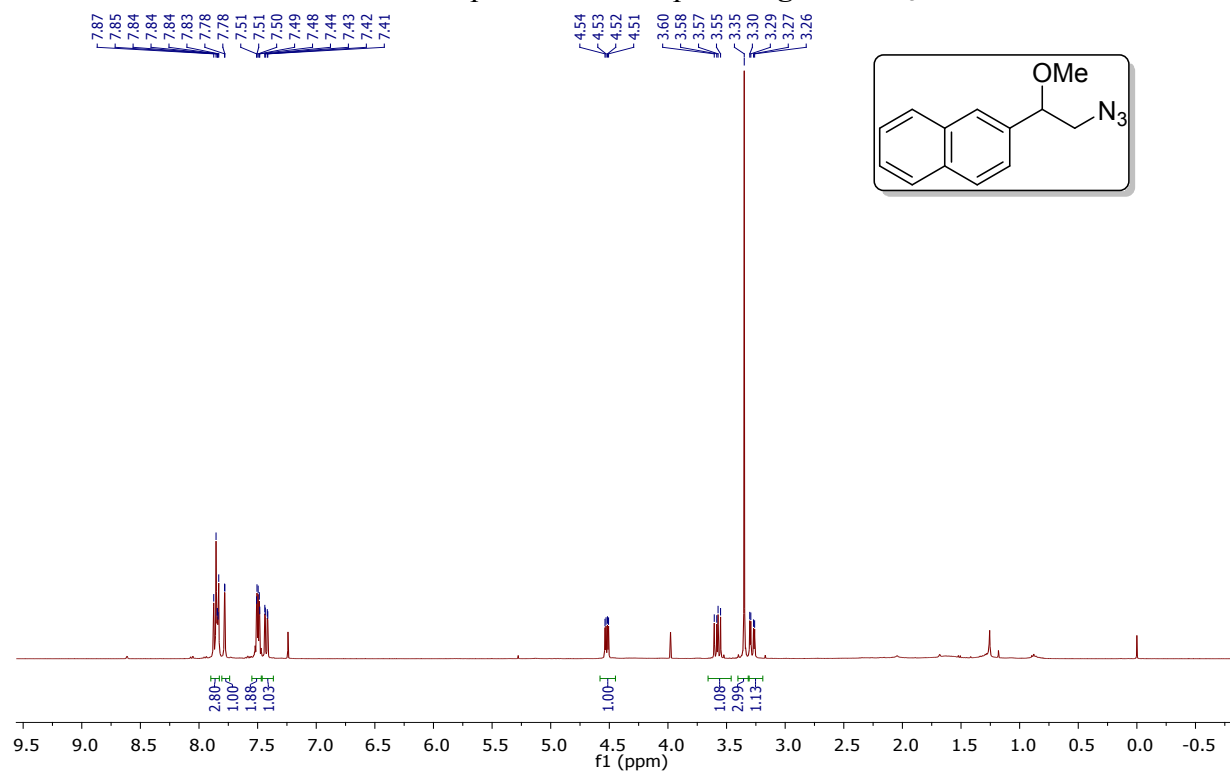

<sup>13</sup>C NMR Spectrum of compound **8g** in CDCl<sub>3</sub>

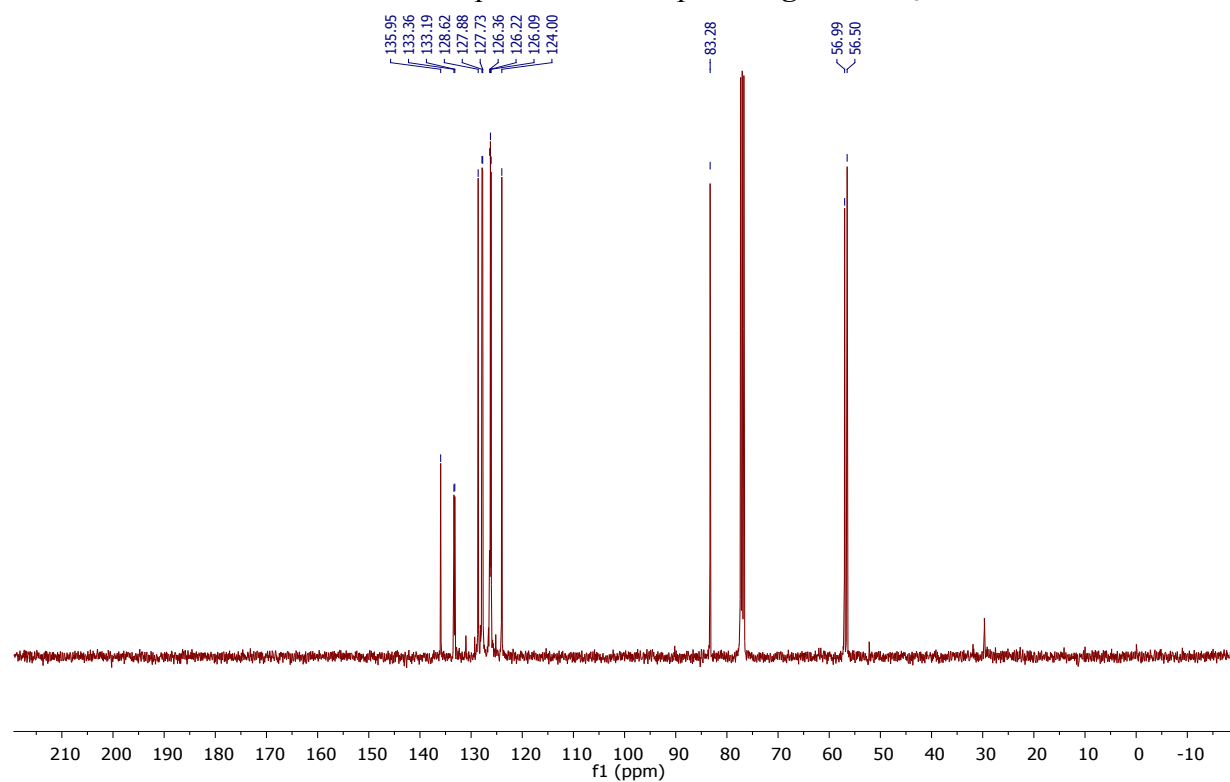

<sup>1</sup>H NMR Spectrum of compound **9** in CDCl<sub>3</sub>

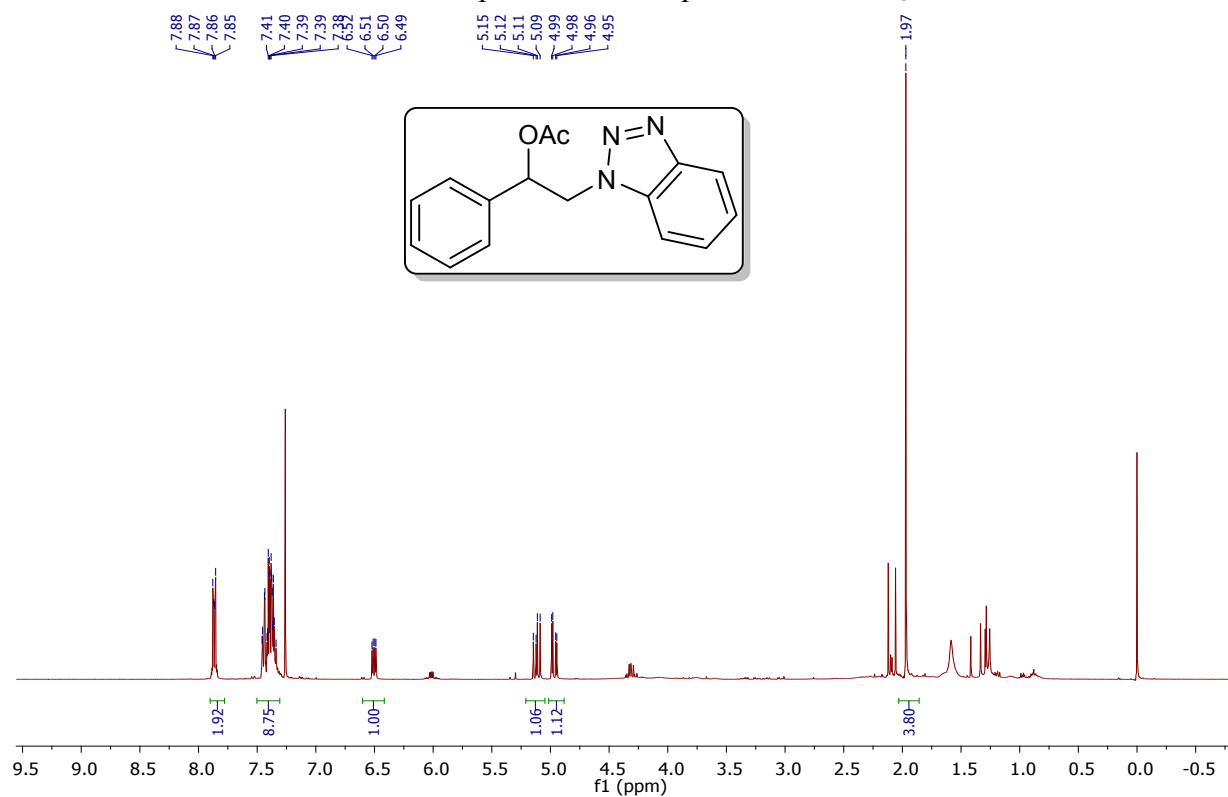

<sup>13</sup>C NMR Spectrum of compound **9** in CDCl<sub>3</sub>

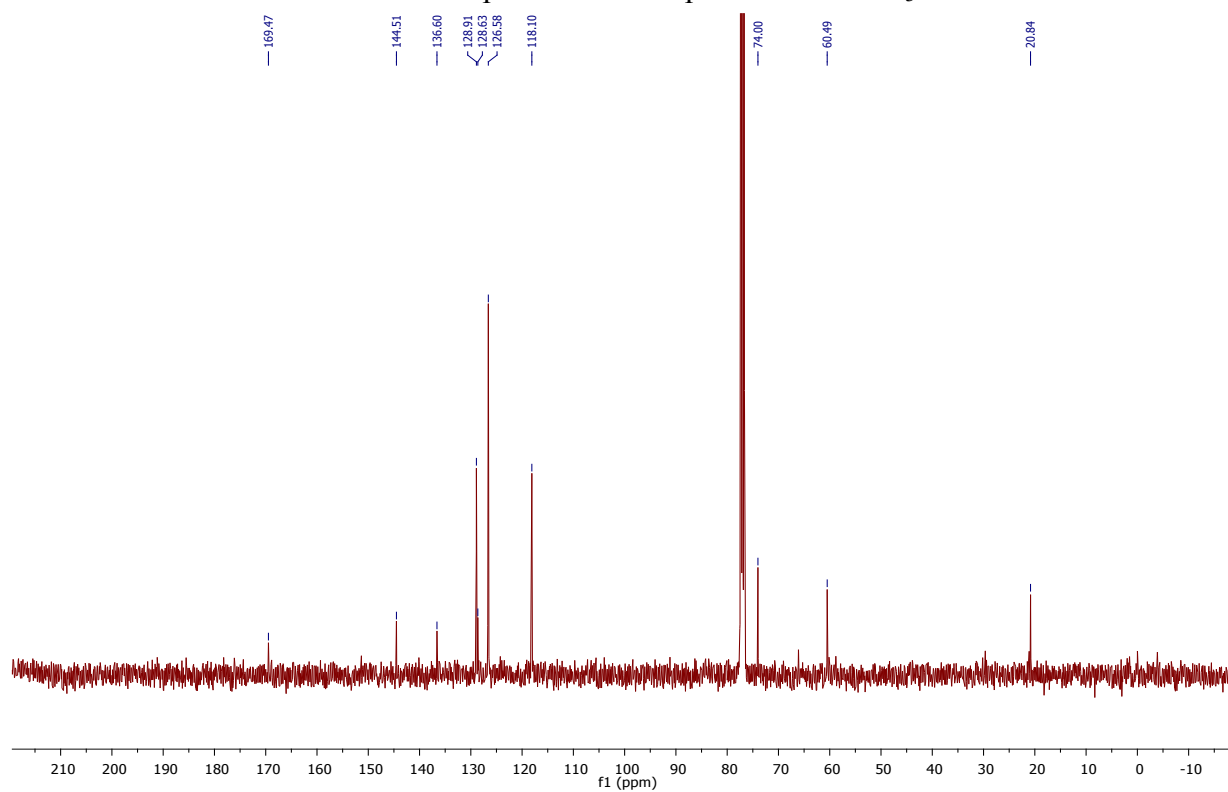



<sup>1</sup>H NMR Spectrum of compound **10** in CDCl<sub>3</sub>

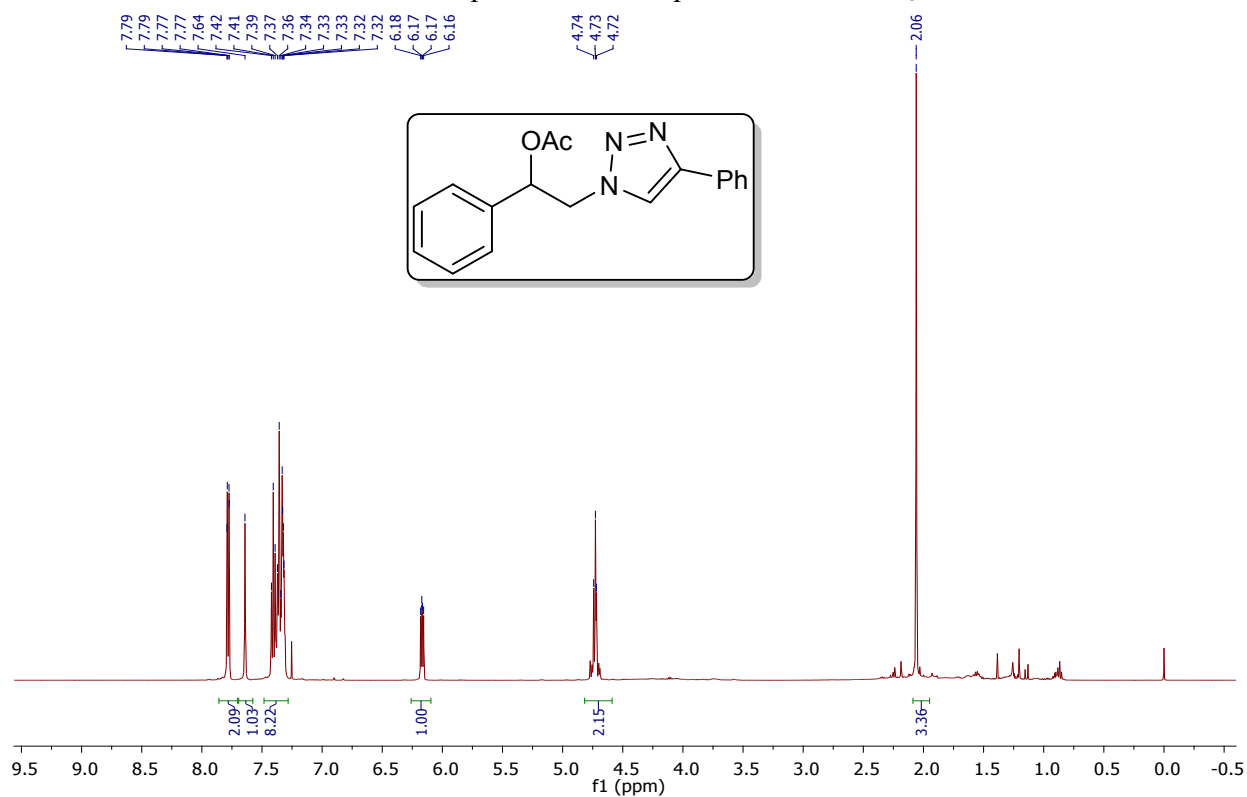

<sup>13</sup>C NMR Spectrum of compound **10** in CDCl<sub>3</sub>

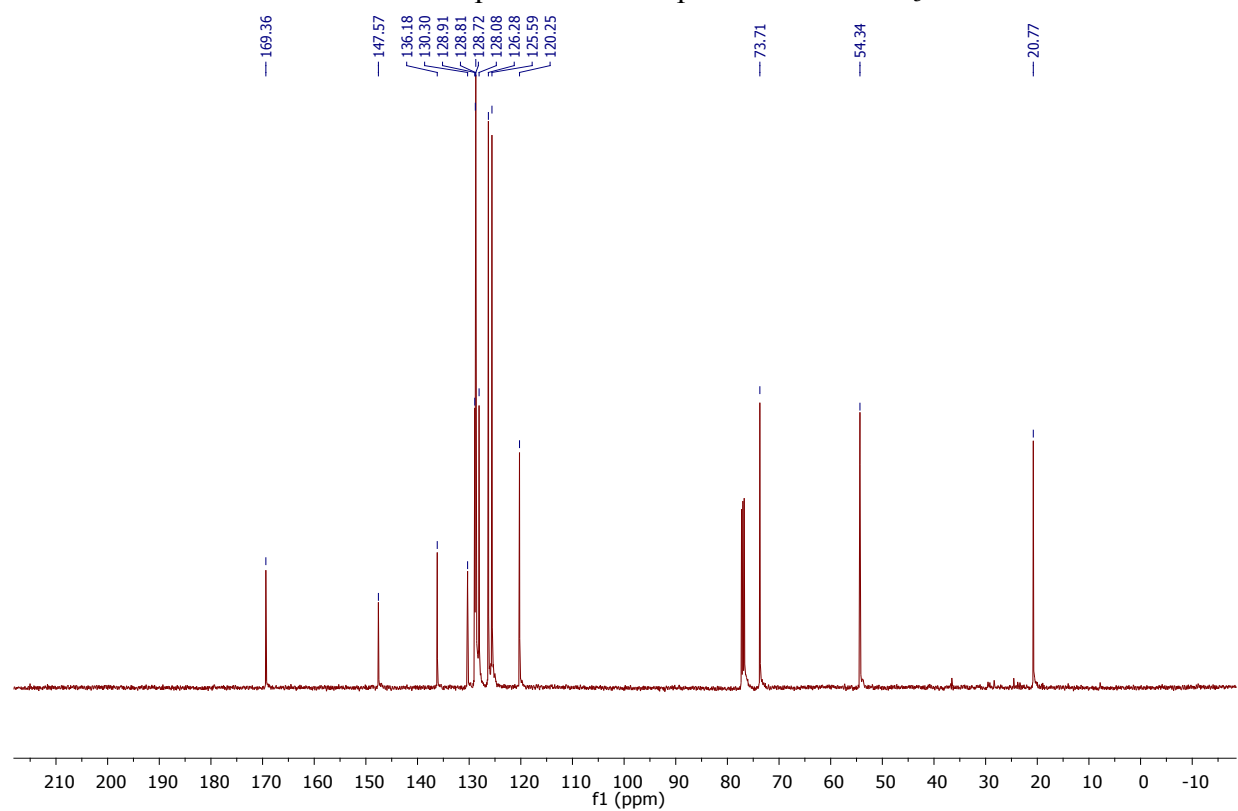

<sup>1</sup>H NMR Spectrum of compound **11** in CDCl<sub>3</sub>

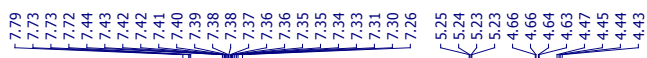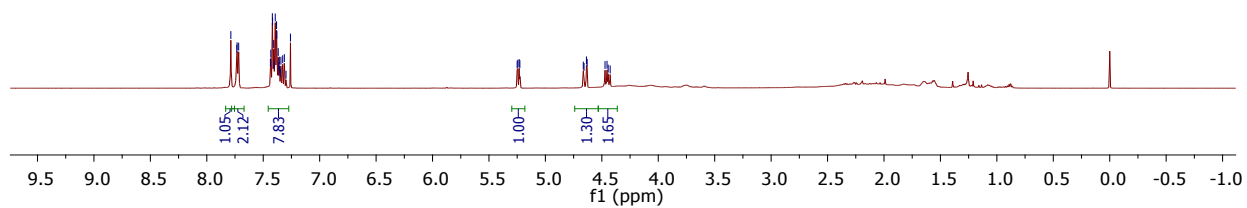

<sup>13</sup>C NMR Spectrum of compound **12** in CDCl<sub>3</sub>

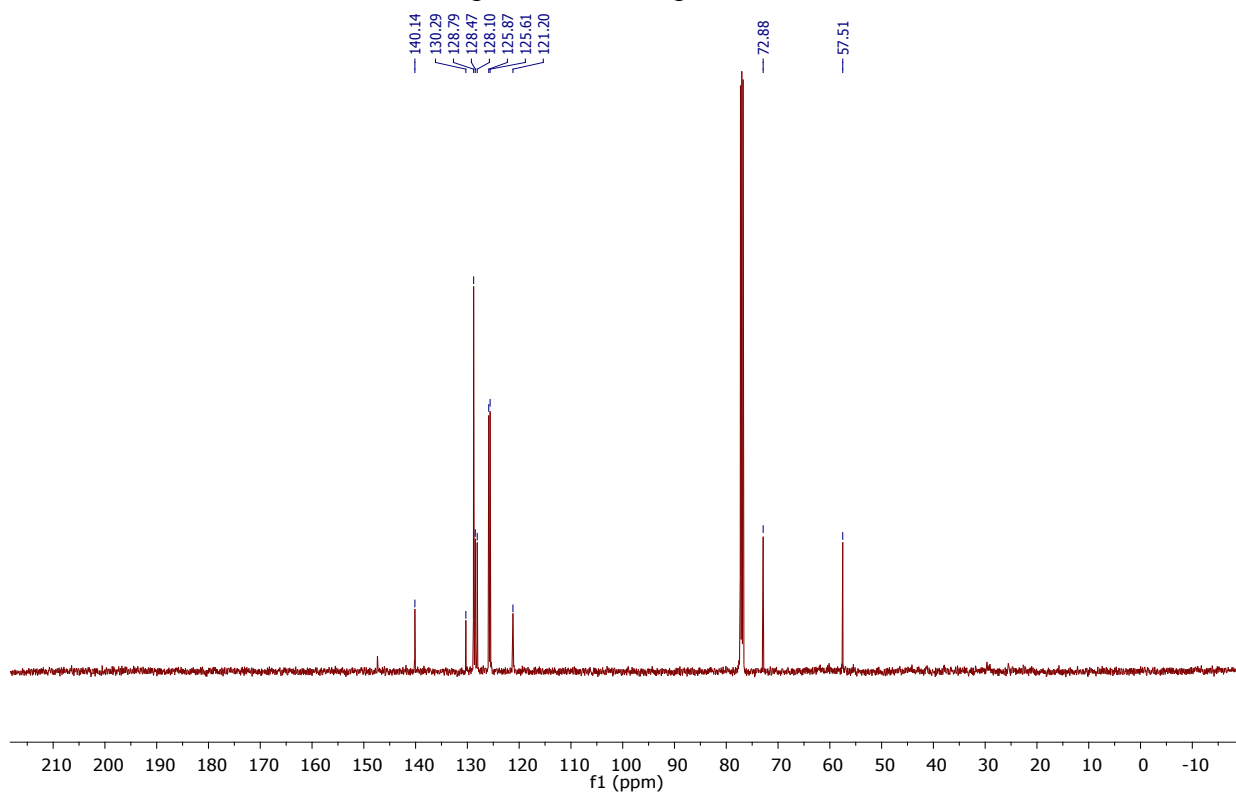

<sup>1</sup>H NMR Spectrum of compound **12** in CDCl<sub>3</sub>

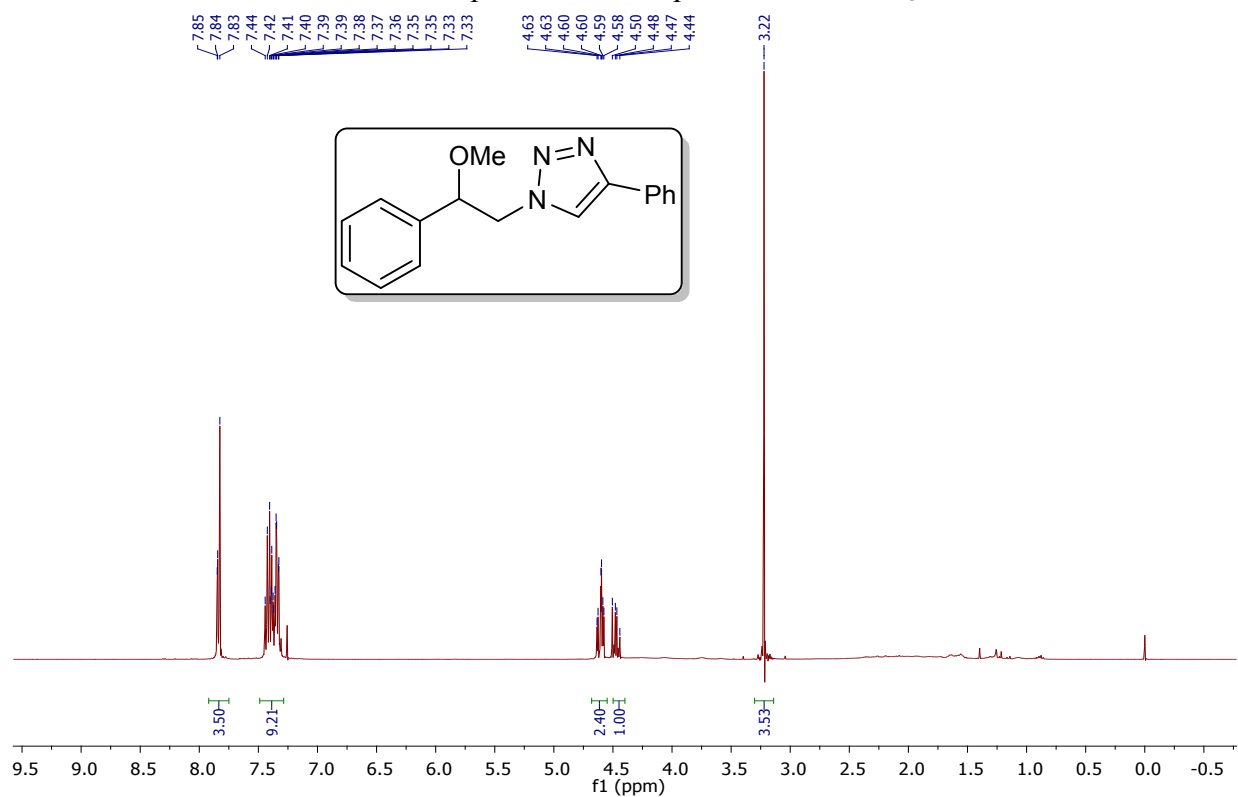

<sup>13</sup>C NMR Spectrum of compound **12** in CDCl<sub>3</sub>

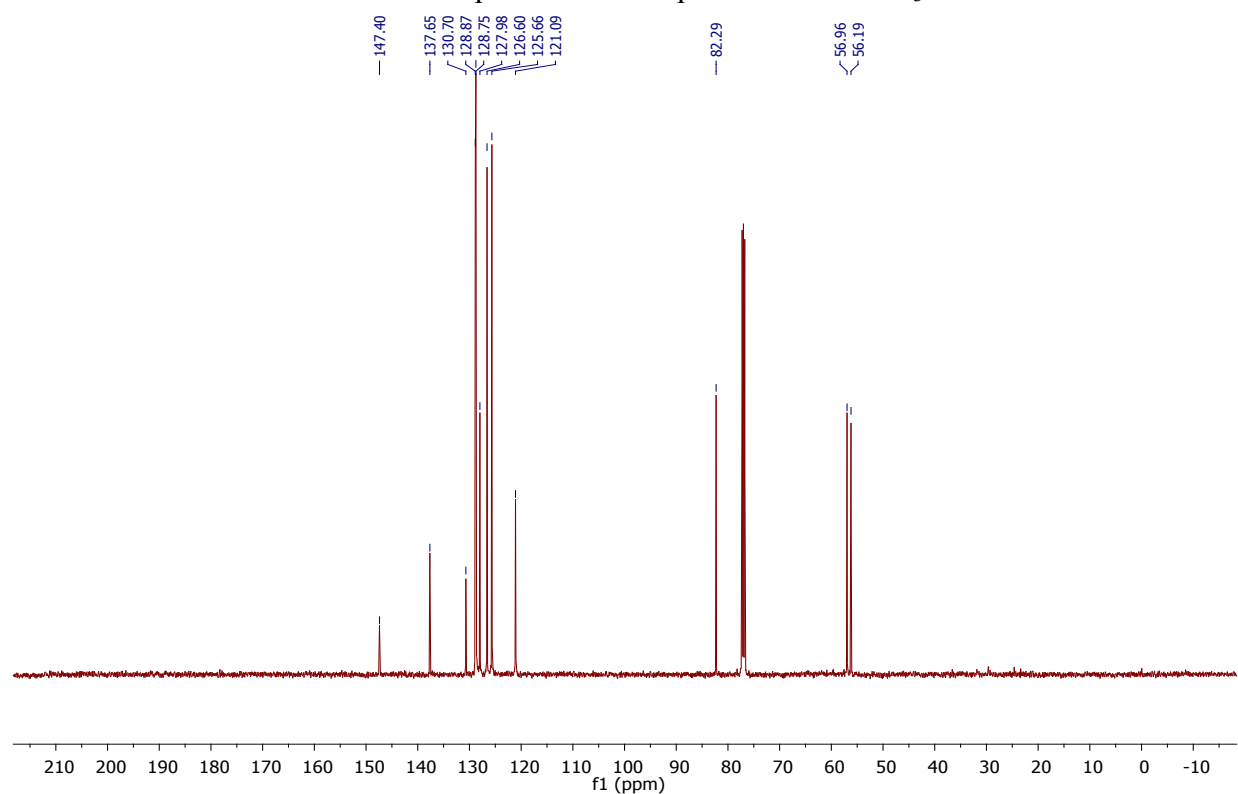

Supplement: c6ob01179a1.pdf [file c6ob01179a1.pdf]
